# Supplementary material for: Can diverse population characteristics be leveraged in a machine learning pipeline to predict resource intensive healthcare utilization among hospital service areas?
Source: Springer Nature journal article supplement (doi:10.1186/s12913-022-08154-4), 2022-06-30
Supplement: MOESM1 [file 23224174]

## Additional File 1. Model Specification for LASSO & Random Forest Models

- Additional File 1
  - File format: PDF
  - File title: Model Specification for LASSO and Random Forest Models
  - File description: Details on methods

| Random Forest Machine Learning Model & Feature Selection Information |                                        |
|----------------------------------------------------------------------|----------------------------------------|
| Number of drawn candidate variables in each split                    | 14.31 (ER), 16.94 (IP), 17.43 (HosExp) |
| Sample size of observations                                          | 3,153 (ER), 3,174 (IP & HosExp)        |
| Whether observations were drawn with replacement                     | TRUE                                   |
| Node size                                                            | 5                                      |
| Number of trees                                                      | 500                                    |
| Splitting rule                                                       | Minimize SSE                           |
| R packaged utilized                                                  | Random Forest & sl3                    |
| LASSO Feature Selection Information                                  |                                        |
| Alpha                                                                | 1                                      |
| Lambda                                                               | Lambda minimum                         |
| R package utilized                                                   | glmnet                                 |
| Regularized Machine Learning Model Information                       |                                        |
| Alpha                                                                | 1 (Tuned)                              |
| Lambda                                                               | Lambda minimum                         |
| R packaged utilized                                                  | Glmnet, Sl3                            |

ER= emergency room visits

IP= inpatient days

HosExp = hospital expenditures

Default hyperparameters were utilized
