# Supplementary material for: Can diverse population characteristics be leveraged in a machine learning pipeline to predict resource intensive healthcare utilization among hospital service areas?
Source: Springer Nature journal article supplement (doi:10.1186/s12913-022-08154-4), 2022-06-30
Supplement: MOESM2 [file 23224174]

## Additional File 2. Descriptive Statistics for Demographic Candidate Predictors (Main Effects)

- Additional File 2
  - File format: PDF
  - File title: Descriptive Statistics for Demographic Candidate Predictors (Main Effects)
  - File description: Long table with univariate results for main effects

|                                                                                    | ER Visits              | Inpatient Days & Hospital Expenditures |
|------------------------------------------------------------------------------------|------------------------|----------------------------------------|
| Total Hospital Service Areas (N)                                                   | 3153                   | 3174                                   |
| census demographics 2017 household income average                                  | 71383.24<br>(80267.55) | 71659.17<br>(80609.51)                 |
| census demographics 2017 population speaks english pop 5 persons                   | 87.0 (14.0)            | 87.0 (14.0)                            |
| census demographics 2017 population speaks spanish pop 5 persons                   | 8.0 (12.0)             | 8.0 (12.0)                             |
| census demographics 2017 population speaks other language pop 5 persons            | 1.0 (4.0)              | 1.0 (4.0)                              |
| census demographics 2017 population citizenship native persons                     | 93.0 (8.0)             | 93.0 (8.0)                             |
| census demographics 2017 population citizenship foreign born naturalized persons   | 3.0 (4.0)              | 3.0 (4.0)                              |
| census demographics 2017 population citizenship foreign born not a citizen persons | 4.02 (4.75)            | 4.04 (4.76)                            |
| census demographics 2017 veterans total persons                                    | 9.77 (3.07)            | 9.75 (3.08)                            |
| census demographics 2017 population total group quarters persons                   | 3.46 (4.19)            | 3.46 (4.18)                            |
| census demographics 2017 population institutional group quarters persons           | 5511.06<br>(16307.85)  | 5.56 (1.64)                            |
| census demographics 2017 population non institutional group quarters persons       | 0.00 (0.01)            | 0.00 (0.01)                            |
| census demographics 2017 householder aged under 25 years households                | 1.86 (1.36)            | 1.86 (1.36)                            |
| census demographics 2017 householder aged 25 to 34 years households                | 5.40 (1.24)            | 5.40 (1.25)                            |
| census demographics 2017 householder aged 35 to 44 years households                | 6.14 (0.85)            | 6.14 (0.85)                            |
| census demographics 2017 householder aged 45 to 54 years households                | 7.88 (0.97)            | 7.88 (0.97)                            |
| census demographics 2017 householder aged 55 to 64 years households                | 8.24 (1.42)            | 8.24 (1.42)                            |
| census demographics 2017 householder aged 65 to 74 years households                | 5.82 (1.57)            | 5.82 (1.57)                            |
| census demographics 2017 householder aged 75 to 84 years households                | 3.61 (1.23)            | 3.61 (1.23)                            |
| census demographics 2017 householder aged 85 years and over households             | 1.67 (0.76)            | 1.67 (0.76)                            |
| census demographics 2017 households with no vehicles households                    | 3.02 (1.75)            | 3.02 (1.75)                            |
| census demographics 2017 households with 1 vehicle households                      | 13.38 (2.84)           | 13.38 (2.84)                           |
| census demographics 2017 households with 2 vehicles households                     | 15.07 (2.26)           | 15.06 (2.26)                           |

|                                                                                                   |                        |                        |
|---------------------------------------------------------------------------------------------------|------------------------|------------------------|
| census demographics 2017 households with 3 vehicles households                                    | 6.25 (1.67)            | 6.24 (1.66)            |
| census demographics 2017 households with 4 vehicles households                                    | 2.91 (1.32)            | 2.90 (1.32)            |
| census demographics 2017 population density persons per sq mile                                   | 13782.65<br>(65567.45) | 14040.06<br>(65613.88) |
| census demographics 2017 education enrolled public or private school pop 3 persons                | 80.52 (7.46)           | 80.53 (7.45)           |
| census demographics 2017 education enrolled public preprimary pop 3 persons                       | 3.59 (1.83)            | 3.59 (1.82)            |
| census demographics 2017 education enrolled private preprimary pop 3 persons                      | 1.75 (1.28)            | 1.75 (1.28)            |
| census demographics 2017 education enrolled public kindergarten pop 3 persons                     | 3.94 (1.48)            | 3.94 (1.48)            |
| census demographics 2017 education enrolled private kindergarten pop 3 persons                    | 0.44 (0.44)            | 0.44 (0.44)            |
| census demographics 2017 education enrolled public grades 1 4 pop 3 persons                       | 15.03 (3.45)           | 15.02 (3.45)           |
| census demographics 2017 education enrolled private grades 1 4 pop 3 persons                      | 1.52 (1.26)            | 1.52 (1.26)            |
| census demographics 2017 education enrolled public grades 5 8 pop 3 persons                       | 15.45 (3.71)           | 15.45 (3.71)           |
| census demographics 2017 education enrolled private grades 5 8 pop 3 persons                      | 1.51 (1.25)            | 1.51 (1.24)            |
| census demographics 2017 education enrolled public grades 9 12 pop 3 persons                      | 15.88 (3.85)           | 15.88 (3.85)           |
| census demographics 2017 education enrolled private grades 9 12 pop 3 persons                     | 1.41 (1.17)            | 1.41 (1.17)            |
| census demographics 2017 education enrolled public undergraduate college pop 3 persons            | 13.46 (8.59)           | 13.46 (8.57)           |
| census demographics 2017 education enrolled private undergraduate college pop 3 persons           | 3.45 (4.21)            | 3.46 (4.23)            |
| census demographics 2017 education enrolled public graduate or professional school pop 3 persons  | 1.99 (1.70)            | 1.99 (1.70)            |
| census demographics 2017 education enrolled private graduate or professional school pop 3 persons | 1.10 (1.29)            | 1.10 (1.30)            |
| census demographics 2017 education not enrolled in school pop 3 persons                           | 235.72 (53.24)         | 2.3564<br>(0.05)       |
| census demographics 2017 education attainment high school pop 25 persons                          | 14.00 (6.72)           | 14.00 (6.72)           |
| census demographics 2017 education attainment high school pop 25 persons 2                        | 32.06 (7.62)           | 32.04 (7.63)           |
| census demographics 2017 education attainment some college pop 25 persons                         | 22.37 (4.37)           | 22.36 (4.37)           |
| census demographics 2017 population in poverty total persons                                      | 16.58 (6.76)           | 16.57 (6.76)           |
| census demographics 2017 education attainment associate s degree pop 25 persons                   | 8.45 (2.50)            | 8.45 (2.50)            |
| census demographics 2017 education attainment bachelor s degree pop 25 persons                    | 14.83 (6.25)           | 14.85 (6.27)           |
| census demographics 2017 education attainment master s degree pop 25 persons                      | 5.96 (3.47)            | 5.97 (3.48)            |

|                                                                                              |               |               |
|----------------------------------------------------------------------------------------------|---------------|---------------|
| census demographics 2017 education attainment professional degree pop 25 persons             | 1.39 (1.12)   | 1.40 (1.12)   |
| census demographics 2017 education attainment doctorate degree pop 25 persons                | 0.00 (0.00)   | 0.00 (0.00)   |
| census demographics 2017 households with income less than 15000 households                   | 4.78 (1.95)   | 4.78 (1.95)   |
| census demographics 2017 households with income 15000 to 24999 households                    | 3.78 (1.19)   | 3.78 (1.19)   |
| census demographics 2017 households with income 25000 to 34999 households                    | 3.91 (1.05)   | 3.90 (1.05)   |
| census demographics 2017 households with income 35000 to 49999 households                    | 5.21 (1.15)   | 5.20 (1.15)   |
| census demographics 2017 households with income 50000 to 74999 households                    | 6.91 (1.24)   | 6.91 (1.24)   |
| census demographics 2017 households with income 75000 to 99999 households                    | 5.37 (0.96)   | 5.36 (0.96)   |
| census demographics 2017 households with income 100000 to 124999 households                  | 3.79 (0.83)   | 3.79 (0.83)   |
| census demographics 2017 households with income 125000 to 149999 households                  | 2.46 (0.77)   | 2.46 (0.77)   |
| census demographics 2017 households with income 150000 to 199999 households                  | 2.12 (1.05)   | 2.12 (1.05)   |
| census demographics 2017 households with income 200000 and over households                   | 2.30 (2.00)   | 2.31 (2.01)   |
| census demographics 2017 households 1 person households                                      | 11.76 (3.00)  | 11.75 (3.00)  |
| census demographics 2017 households 2 person households                                      | 13.95 (2.77)  | 13.94 (2.77)  |
| census demographics 2017 households 3 person households                                      | 6.08 (0.85)   | 6.08 (0.85)   |
| census demographics 2017 households 4 person households                                      | 4.81 (0.74)   | 4.82 (0.74)   |
| census demographics 2017 households 5 person households                                      | 2.39 (0.49)   | 2.39 (0.49)   |
| census demographics 2017 households 6 person households                                      | 0.97 (0.34)   | 0.97 (0.34)   |
| census demographics 2017 households 7 or more person households                              | 0.65 (0.44)   | 0.65 (0.44)   |
| census demographics 2017 families married with children under 18 families                    | 29.07 (5.63)  | 29.08 (5.63)  |
| census demographics 2017 household average size persons                                      | 52.07 (56.59) | 5.228 (5.673) |
| census demographics 2017 head of household male households                                   | 24.63 (3.36)  | 24.61 (3.36)  |
| census demographics 2017 head of household female households                                 | 15.99 (2.52)  | 15.99 (2.52)  |
| census demographics 2017 family head of household male households                            | 67.46 (7.35)  | 67.44 (7.34)  |
| census demographics 2017 family head of household female households                          | 32.54 (7.35)  | 32.56 (7.34)  |
| census demographics 2017 families married families                                           | 73.16 (7.63)  | 73.13 (7.63)  |
| census demographics 2017 other families male householder no wife present other families      | 30.15 (5.64)  | 30.13 (5.63)  |
| census demographics 2017 other families female householder no husband present other families | 69.85 (5.64)  | 69.87 (5.63)  |
| census demographics 2017 families married with no children under 18 families                 | 44.09 (7.66)  | 44.05 (7.66)  |

|                                                                                                                        |               |               |
|------------------------------------------------------------------------------------------------------------------------|---------------|---------------|
| census demographics 2017 other families male householder no wife present with children under 18 other families         | 18.34 (4.74)  | 18.32 (4.74)  |
| census demographics 2017 other families male householder no wife present with no children under 18 other families      | 11.80 (2.65)  | 11.81 (2.65)  |
| census demographics 2017 other families female householder no husband present with children under 18 other families    | 45.55 (5.88)  | 45.54 (5.90)  |
| census demographics 2017 other families female householder no husband present with no children under 18 other families | 24.30 (5.14)  | 24.33 (5.16)  |
| census demographics 2017 non family head of household male households                                                  | 47.54 (4.43)  | 47.53 (4.42)  |
| census demographics 2017 non family head of household female households                                                | 52.46 (4.43)  | 52.47 (4.42)  |
| census demographics 2017 non family households male householder with people under 18 households                        | 0.89 (0.44)   | 0.89 (0.43)   |
| census demographics 2017 non family households male householder with no people under 18 households                     | 46.62 (4.53)  | 46.61 (4.53)  |
| census demographics 2017 non family households female householder with people under 18 households                      | 0.24 (0.16)   | 0.24 (0.16)   |
| census demographics 2017 non family households female householder with no people under 18 households                   | 52.24 (4.60)  | 52.26 (4.60)  |
| census demographics 2017 population urban persons                                                                      | 60.98 (31.71) | 61.11 (31.72) |
| census demographics 2017 population rural persons                                                                      | 39.02 (31.71) | 38.89 (31.72) |
| census demographics 2017 population male persons                                                                       | 49.57 (1.98)  | 49.57 (1.97)  |
| census demographics 2017 population female persons                                                                     | 50.43 (1.98)  | 50.43 (1.97)  |
| census demographics 2017 white population alone persons                                                                | 79.21 (18.00) | 79.12 (18.04) |
| census demographics 2017 black population alone persons                                                                | 8.95 (13.86)  | 9.00 (13.91)  |
| census demographics 2017 asian population alone persons                                                                | 2.63 (5.22)   | 2.65 (5.28)   |
| census demographics 2017 american indian and alaska native population alone persons                                    | 2.15 (8.35)   | 2.14 (8.32)   |
| census demographics 2017 other race population alone persons                                                           | 0.00 (0.01)   | 0.00 (0.01)   |
| census demographics 2017 two or more races population persons                                                          | 9.79 (2.55)   | 9.88 (2.54)   |
| census demographics 2017 hispanic population persons                                                                   | 11.12 (15.00) | 11.14 (15.00) |
| census demographics 2017 white non hispanic population persons                                                         | 73.17 (22.18) | 73.07 (22.21) |
| census demographics 2017 white households households                                                                   | 34.02 (8.65)  | 33.98 (8.66)  |
| census demographics 2017 black households households                                                                   | 3.24 (5.27)   | 3.26 (5.29)   |
| census demographics 2017 asian households households                                                                   | 0.82 (1.69)   | 0.83 (1.71)   |
| census demographics 2017 american indian and alaska native head of households households                               | 0.70 (2.48)   | 0.69 (2.47)   |
| census demographics 2017 other race head of households persons                                                         | 1.14 (1.59)   | 1.14 (1.58)   |
| census demographics 2017 families 1 person families                                                                    | 0.00 (0.00)   | 0.00 (0.00)   |
| census demographics 2017 two or more races head of households households                                               | 0.71 (0.56)   | 0.71 (0.56)   |
| census demographics 2017 families 2 person families                                                                    | 44.96 (7.71)  | 44.92 (7.71)  |

|                                                                         |              |              |
|-------------------------------------------------------------------------|--------------|--------------|
| census demographics 2017 families 3 person families                     | 21.97 (3.00) | 21.99 (3.00) |
| census demographics 2017 families 4 person families                     | 17.85 (2.87) | 17.86 (2.87) |
| census demographics 2017 families 5 person families                     | 9.01 (2.19)  | 9.01 (2.19)  |
| census demographics 2017 families 6 person families                     | 3.70 (1.50)  | 3.70 (1.50)  |
| census demographics 2017 families 7 or more person families             | 2.50 (2.00)  | 2.51 (2.00)  |
| census demographics 2017 non families 1 person households               | 82.46 (6.10) | 82.45 (6.09) |
| census demographics 2017 non families 2 person households               | 14.19 (3.96) | 14.19 (3.95) |
| census demographics 2017 non families 3 person households               | 2.03 (1.46)  | 2.03 (1.45)  |
| census demographics 2017 hispanic households persons                    | 3.00 (4.28)  | 3.00 (4.27)  |
| census demographics 2017 non families 4 person households               | 0.87 (1.04)  | 0.87 (1.04)  |
| census demographics 2017 non families 5 person households               | 0.27 (0.34)  | 0.28 (0.34)  |
| census demographics 2017 non families 6 person households               | 0.11 (0.56)  | 0.11 (0.56)  |
| census demographics 2017 non families 7 or more person households       | 0.07 (0.15)  | 0.07 (0.15)  |
| census demographics 2017 families aged under 25 years families          | 3.29 (1.53)  | 3.29 (1.54)  |
| census demographics 2017 families aged 25 to 34 years families          | 14.55 (3.36) | 14.54 (3.36) |
| census demographics 2017 families aged 35 to 44 years families          | 18.52 (3.03) | 18.52 (3.02) |
| census demographics 2017 families aged 45 to 54 years families          | 21.17 (2.93) | 21.18 (2.94) |
| census demographics 2017 families aged 55 to 64 years families          | 20.22 (2.58) | 20.22 (2.58) |
| census demographics 2017 white non hispanic households households       | 32.32 (9.88) | 32.27 (9.89) |
| census demographics 2017 families aged 65 to 74 years families          | 13.43 (3.13) | 13.42 (3.12) |
| census demographics 2017 families aged 75 years and over families       | 8.84 (2.63)  | 8.83 (2.62)  |
| census demographics 2017 non families aged under 25 years households    | 6.55 (5.82)  | 6.54 (5.81)  |
| census demographics 2017 non families aged 25 to 34 years households    | 11.12 (4.28) | 11.14 (4.29) |
| census demographics 2017 non families aged 35 to 44 years households    | 9.15 (2.31)  | 9.16 (2.31)  |
| census demographics 2017 non families aged 45 to 54 years households    | 16.36 (2.86) | 16.36 (2.85) |
| census demographics 2017 non families aged 55 to 64 years households    | 20.44 (3.25) | 20.44 (3.25) |
| census demographics 2017 non families aged 65 to 74 years households    | 15.94 (3.44) | 15.94 (3.44) |
| census demographics 2017 non families aged 75 years and over households | 20.43 (5.84) | 20.42 (5.83) |
| census demographics 2017 population median age years                    | 42.80 (4.86) | 42.78 (4.86) |
| census demographics 2017 householder median age years                   | 54.13 (3.26) | 54.12 (3.27) |
| census demographics 2017 families median age years                      | 52.16 (3.06) | 52.15 (3.07) |
| census demographics 2017 family median size number persons              | 3.18 (0.31)  | 3.18 (0.31)  |
| census demographics 2017 households median size number persons          | 2.87 (0.29)  | 2.88 (0.29)  |
| census demographics 2017 families median age years                      | 52.16 (3.06) | 52.14 (3.07) |

HH=Household

Fam=Family

Pop=Population

Non Fam=Non family

OT=Other

ER=Emergency room

RV=recreational vehicle

Equip=equipment

Misc.=miscellaneous

BCBS=Blue Cross Blue Shield

OOT=Out of town

RIHC=resource intensive healthcare
