# Supplementary material for: Can diverse population characteristics be leveraged in a machine learning pipeline to predict resource intensive healthcare utilization among hospital service areas?
Source: Springer Nature journal article supplement (doi:10.1186/s12913-022-08154-4), 2022-06-30
Supplement: MOESM3 [file 23224174]

## Additional File 3. Descriptive Statistics for Demographic Candidate Predictors (second order terms)

- Additional File 3
  - File format: PDF
  - File title: Descriptive Statistics for Demographic Candidate Predictors (second order terms)
  - File description: Long table with univariate results for second order terms

| ER Visits (mean (sd))                                                                                                                           |                         |
|-------------------------------------------------------------------------------------------------------------------------------------------------|-------------------------|
| census demographics 2017 household income average census demographics 2017 household average size persons                                       | 13961.83 (35283.96)     |
| census demographics 2017 population non institutional group quarters persons census demographics 2017 household average size persons            | 0.0003 (0.0013)         |
| census demographics 2017 householder aged under 25 years households census demographics 2017 household average size persons                     | 0.86 (1.08)             |
| census demographics 2017 population density persons per sq mile census demographics 2017 household average size persons                         | 13711.10(121312.51)     |
| census demographics 2017 education enrolled private undergraduate college pop 3 persons census demographics 2017 household average size persons | 1.54 (3.93)             |
| census demographics 2017 education attainment doctorate degree pop 25 persons census demographics 2017 household average size persons           | 0.0003 (0.0005)         |
| census demographics 2017 non family head of household female households census demographics 2017 household average size persons                 | 27.05 (29.24)           |
| census demographics 2017 population urban persons census demographics 2017 household average size persons                                       | 27.35 (37.51)           |
| census demographics 2017 population rural persons census demographics 2017 household average size persons                                       | 24.71 (40.67)           |
| census demographics 2017 black population alone persons census demographics 2017 household average size persons                                 | 4.52 (12.20)            |
| census demographics 2017 non families aged 25 to 34 years households census demographics 2017 household average size persons                    | 5.27 (6.00)             |
| census demographics 2017 non families aged 65 to 74 years households census demographics 2017 household average size persons                    | 8.62 (10.01)            |
| Inpatient Days (mean (sd))                                                                                                                      |                         |
| census demographics 2017 household income average census demographics 2017 household average size persons                                       | 1421719.54 (3507123.29) |
| census demographics 2017 population non institutional group quarters persons census demographics 2017 household average size persons            | 0.03 (0.13)             |

|                                                                                                                                                                        |                         |
|------------------------------------------------------------------------------------------------------------------------------------------------------------------------|-------------------------|
| census demographics 2017 population density persons per sq mile census demographics 2017 household average size persons                                                | 1088937.99 (9932172.78) |
| census demographics 2017 education attainment professional degree pop 25 persons census demographics 2017 household average size persons                               | 62.88 (128.54)          |
| census demographics 2017 education attainment doctorate degree pop 25 persons census demographics 2017 household average size persons                                  | 0.03 (0.05)             |
| census demographics 2017 head of household male households census demographics 2017 household average size persons                                                     | 1321.07 (1431.79)       |
| census demographics 2017 family head of household female households census demographics 2017 household average size persons                                            | 1684.66 (1923.53)       |
| census demographics 2017 other families male householder no wife present with children under 18 other families census demographics 2017 household average size persons | 1015.74 (1193.56)       |
| census demographics 2017 population urban persons census demographics 2017 household average size persons                                                              | 2735.55 (3710.78)       |
| census demographics 2017 black population alone persons census demographics 2017 household average size persons                                                        | 474.09 (1291.30)        |
| census demographics 2017 other race population alone persons census demographics 2017 household average size persons                                                   | 0.12 (0.32)             |
| census demographics 2017 families aged under 25 years families census demographics 2017 household average size persons                                                 | 179.34 (231.32)         |
| Hospital Expenditures (mean (sd))                                                                                                                                      |                         |
| census demographics 2017 household income average census demographics 2017 household average size persons                                                              | 1421719.54 (3507123.29) |
| census demographics 2017 population non institutional group quarters persons census demographics 2017 household average size persons                                   | 0.03 (0.13)             |
| census demographics 2017 population density persons per sq mile census demographics 2017 household average size persons                                                | 1088937.99 (9932172.78) |
| census demographics 2017 education attainment professional degree pop 25 persons census demographics 2017 household average size persons                               | 62.88 (128.54)          |
| census demographics 2017 education attainment doctorate degree pop 25 persons census demographics 2017 household average size persons                                  | 0.03 (0.05)             |
| census demographics 2017 head of household male households census demographics 2017 household average size persons                                                     | 1321.07 (1431.79)       |
| census demographics 2017 family head of household female households census demographics 2017 household average size persons                                            | 1684.66 (1923.53)       |
| census demographics 2017 other families male householder no wife present with children under 18 other families census demographics 2017 household average size persons | 1015.74 (1193.56)       |

|                                                                                                                           |                   |
|---------------------------------------------------------------------------------------------------------------------------|-------------------|
| census demographics 2017 population urban persons census<br>demographics 2017 household average size persons              | 2735.55 (3710.78) |
| census demographics 2017 black population alone persons census<br>demographics 2017 household average size persons        | 474.09 (1291.30)  |
| census demographics 2017 other race population alone persons census<br>demographics 2017 household average size persons   | 0.12 (0.32)       |
| census demographics 2017 families aged under 25 years families census<br>demographics 2017 household average size persons | 179.34 (231.32)   |

HH=Household  
Fam=Family  
Pop=Population  
Non Fam=Non family  
OT=Other  
ER=Emergency room  
RV=recreational vehicle  
Equip=equipment  
Misc.=miscellaneous  
BCBS=Blue Cross Blue Shield  
OOT=Out of town  
RIHC=resource intensive healthcare
