# Supplementary material for: Can diverse population characteristics be leveraged in a machine learning pipeline to predict resource intensive healthcare utilization among hospital service areas?
Source: Springer Nature journal article supplement (doi:10.1186/s12913-022-08154-4), 2022-06-30
Supplement: MOESM4 [file 23224174]

## Additional File 4. Descriptive Statistics for Adult & Child Health Characteristics (Main effects)

- Additional File 4
  - File format: PDF
  - File title: Descriptive Statistics for Adult & Child Health Characteristics (Main effects)
  - File description: Long table with univariate results for main effects

|                                                                                                                                                        | ER                     | Inpatient Days & Hospital Expenditures |
|--------------------------------------------------------------------------------------------------------------------------------------------------------|------------------------|----------------------------------------|
| Hospital Service Area (N)                                                                                                                              | 3153                   | 3174                                   |
| hsanum                                                                                                                                                 | 26296.63<br>(14813.77) | 26281.36<br>(14809.53)                 |
| health adults 2017 aerobic guidelines only inactive count of households persons                                                                        | 23.62<br>(1.59)        | 23.62<br>(1.59)                        |
| health adults 2017 aerobic guidelines only insufficiently active count of households persons                                                           | 15.36<br>(0.70)        | 15.36<br>(0.70)                        |
| health adults 2017 aerobic guidelines only sufficiently active met guidelines count of households persons                                              | 37.63<br>(1.87)        | 37.63<br>(1.87)                        |
| health adults 2017 full guidelines strengthening and aerobic combined met neither count of households persons                                          | 36.32<br>(2.00)        | 36.32<br>(1.99)                        |
| health adults 2017 full guidelines strengthening and aerobic combined met muscle strengthening only count of households persons                        | 2.68<br>(0.15)         | 2.68<br>(0.15)                         |
| health adults 2017 full guidelines strengthening and aerobic combined met aerobic only count of households persons                                     | 21.55<br>(1.14)        | 21.55<br>(1.14)                        |
| health adults 2017 full guidelines strengthening and aerobic combined met both muscle strengthening and aerobic guidelines count of households persons | 16.03<br>(0.91)        | 16.03<br>(0.92)                        |
| health adults 2017 serious psychological distress count of households persons                                                                          | 2.70<br>(0.29)         | 2.70<br>(0.29)                         |
| health adults 2017 type hospital emergency room count of households persons                                                                            | 0.69<br>(0.09)         | 0.69<br>(0.09)                         |
| health adults 2017 type hospital outpatient department count of households persons                                                                     | 0.78<br>(0.08)         | 0.78<br>(0.08)                         |
| health adults 2017 has unmet dental need due to cost count of households persons                                                                       | 8.47<br>(0.85)         | 8.47<br>(0.85)                         |
| health adults 2017 does not have unmet dental need due to cost count of households persons                                                             | 68.58<br>(3.14)        | 68.58<br>(3.14)                        |

|                                                                                                                      |                 |                 |
|----------------------------------------------------------------------------------------------------------------------|-----------------|-----------------|
| health adults 2017 all types heart disease count of households persons                                               | 9.66<br>(1.08)  | 9.66<br>(1.08)  |
| health adults 2017 last dental visit 6 months or less count of households persons                                    | 36.33<br>(2.37) | 36.34<br>(2.38) |
| health adults 2017 last dental visit more than six months but not more than 1 year ago count of households persons   | 12.43<br>(0.55) | 12.44<br>(0.55) |
| health adults 2017 last dental visit more than 1 year but not more than 2 years ago count of households persons      | 9.45<br>(0.48)  | 9.45<br>(0.48)  |
| health adults 2017 last dental visit more than 2 years ago but not more than 5 years ago count of households persons | 8.49<br>(0.60)  | 8.49<br>(0.60)  |
| health adults 2017 last dental visit more than 5 years ago excluding never count of households persons               | 9.31<br>(1.01)  | 9.31<br>(1.01)  |
| health adults 2017 last dental visit never count of households persons                                               | 0.71<br>(0.05)  | 0.71<br>(0.05)  |
| health adults 2017 hiv ever tested count of households persons                                                       | 27.80<br>(1.64) | 27.80<br>(1.64) |
| health adults 2017 hiv never tested count of households persons                                                      | 45.95<br>(2.80) | 45.95<br>(2.80) |
| health adults 2017 any cancer count of households persons                                                            | 7.38<br>(1.08)  | 7.38<br>(1.08)  |
| health adults 2017 breast cancer count of households persons                                                         | 1.34<br>(0.15)  | 1.34<br>(0.15)  |
| health adults 2017 cervical cancer count of households persons                                                       | 0.34<br>(0.02)  | 0.34<br>(0.02)  |
| health adults 2017 prostate cancer count of households persons                                                       | 0.91<br>(0.14)  | 0.91<br>(0.14)  |
| health adults 2017 diabetes count of households persons                                                              | 7.81<br>(0.88)  | 7.81<br>(0.88)  |
| health adults 2017 ulcers count of households persons                                                                | 4.87<br>(0.36)  | 4.87<br>(0.36)  |
| health adults 2017 kidney disease count of households persons                                                        | 1.63<br>(0.20)  | 1.63<br>(0.20)  |
| health adults 2017 liver disease count of households persons                                                         | 1.29<br>(0.09)  | 1.29<br>(0.09)  |
| health adults 2017 arthritis diagnosis count of households persons                                                   | 18.70<br>(1.97) | 18.69<br>(1.96) |
| health adults 2017 coronary count of households persons                                                              | 5.12<br>(0.71)  | 5.12<br>(0.70)  |
| health adults 2017 chronic joint symptoms count of households persons                                                | 24.00<br>(1.81) | 23.99<br>(1.81) |
| health adults 2017 migraines or severe headaches count of households persons                                         | 11.62<br>(0.48) | 11.62<br>(0.48) |
| health adults 2017 pain in neck count of households persons                                                          | 12.66<br>(0.65) | 12.66<br>(0.65) |
| health adults 2017 pain in lower back count of households persons                                                    | 23.51<br>(1.27) | 23.51<br>(1.27) |
| health adults 2017 pain in face or jaw count of households persons                                                   | 3.27<br>(0.16)  | 3.27<br>(0.16)  |
| health adults 2017 hearing trouble count of households persons                                                       | 12.58<br>(1.32) | 12.58<br>(1.31) |

|                                                                                                              |                 |                 |
|--------------------------------------------------------------------------------------------------------------|-----------------|-----------------|
| health adults 2017 vision trouble count of households persons                                                | 7.48<br>(0.50)  | 7.48<br>(0.50)  |
| health adults 2017 absence of all natural teeth count of households persons                                  | 5.95<br>(0.73)  | 5.95<br>(0.73)  |
| health adults 2017 sadness all or most of the time count of households persons                               | 2.23<br>(0.23)  | 2.23<br>(0.23)  |
| health adults 2017 sadness some of the time count of households persons                                      | 6.43<br>(0.44)  | 6.43<br>(0.44)  |
| health adults 2017 hypertension count of households persons                                                  | 22.03<br>(2.27) | 22.03<br>(2.27) |
| health adults 2017 hopelessness all or most of the time count of households persons                          | 1.59<br>(0.16)  | 1.59<br>(0.16)  |
| health adults 2017 hopelessness some of the time count of households persons                                 | 3.79<br>(0.30)  | 3.79<br>(0.30)  |
| health adults 2017 worthlessness all or most of the time count of households persons                         | 1.35<br>(0.16)  | 1.35<br>(0.16)  |
| health adults 2017 worthlessness some of the time count of households persons                                | 2.90<br>(0.24)  | 2.90<br>(0.24)  |
| health adults 2017 everything is an effort all or most of the time count of households persons               | 5.04<br>(0.41)  | 5.04<br>(0.41)  |
| health adults 2017 everything is an effort some of the time count of households persons                      | 7.70<br>(0.39)  | 7.70<br>(0.39)  |
| health adults 2017 nervousness all or most of the time count of households persons                           | 3.89<br>(0.25)  | 3.89<br>(0.25)  |
| health adults 2017 nervousness some of the time count of households persons                                  | 9.91<br>(0.43)  | 9.91<br>(0.43)  |
| health adults 2017 restlessness all of most of the time count of households persons                          | 4.98<br>(0.34)  | 4.98<br>(0.34)  |
| health adults 2017 restlessness some of the time count of households persons                                 | 9.82<br>(0.48)  | 9.82<br>(0.48)  |
| health adults 2017 stroke count of households persons                                                        | 2.20<br>(0.27)  | 2.20<br>(0.27)  |
| health adults 2017 difficult of cannot be done any physical activity count of households persons             | 13.17<br>(1.29) | 13.16<br>(1.29) |
| health adults 2017 difficult of cannot be done walk a quarter of a mile count of households persons          | 6.01<br>(0.66)  | 6.01<br>(0.66)  |
| health adults 2017 difficult of cannot be done climb up 10 steps without resting count of households persons | 4.38<br>(0.50)  | 4.38<br>(0.50)  |
| health adults 2017 difficult of cannot be done stand for 2 hours count of households persons                 | 8.21<br>(0.87)  | 8.21<br>(0.87)  |
| health adults 2017 difficult of cannot be done sit for 2 hours count of households persons                   | 2.73<br>(0.26)  | 2.73<br>(0.26)  |
| health adults 2017 difficult of cannot be done stoop bend or kneel count of households persons               | 7.68<br>(0.80)  | 7.67<br>(0.79)  |
| health adults 2017 difficult of cannot be done reach overhead count of households persons                    | 2.05<br>(0.22)  | 2.05<br>(0.22)  |
| health adults 2017 difficult of cannot be done grasp or handle small objects count of households persons     | 1.56<br>(0.17)  | 1.56<br>(0.17)  |
| health adults 2017 difficult of cannot be done lift or carry 10 pounds count of households persons           | 3.61<br>(0.38)  | 3.61<br>(0.38)  |

|                                                                                                       |                 |                 |
|-------------------------------------------------------------------------------------------------------|-----------------|-----------------|
| health adults 2017 difficult of cannot be done push or pull large objects count of households persons | 5.22<br>(0.53)  | 5.22<br>(0.53)  |
| health adults 2017 emphysema count of households persons                                              | 1.21<br>(0.16)  | 1.21<br>(0.16)  |
| health adults 2017 health status excellent or very good count of households persons                   | 46.63<br>(2.34) | 46.63<br>(2.34) |
| health adults 2017 health status good count of households persons                                     | 21.01<br>(1.19) | 21.01<br>(1.19) |
| health adults 2017 health status fair or poor count of households persons                             | 10.19<br>(0.95) | 10.19<br>(0.95) |
| health adults 2017 ever had asthma count of households persons                                        | 9.88<br>(0.48)  | 9.88<br>(0.48)  |
| health adults 2017 all current smokers count of households persons                                    | 11.89<br>(0.84) | 11.89<br>(0.84) |
| health adults 2017 every day smokers count of households persons                                      | 9.06<br>(0.71)  | 9.06<br>(0.71)  |
| health adults 2017 some day smokers count of households persons                                       | 2.82<br>(0.14)  | 2.82<br>(0.14)  |
| health adults 2017 former smokers count of households persons                                         | 17.57<br>(1.42) | 17.57<br>(1.42) |
| health adults 2017 non smokers count of households persons                                            | 48.48<br>(2.11) | 48.49<br>(2.11) |
| health adults 2017 alcohol lifetime abstainer count of households persons                             | 15.51<br>(0.88) | 15.52<br>(0.88) |
| health adults 2017 alcohol former infrequent count of households persons                              | 6.76<br>(0.53)  | 6.75<br>(0.53)  |
| health adults 2017 alcohol former regular count of households persons                                 | 4.45<br>(0.36)  | 4.45<br>(0.36)  |
| health adults 2017 still has asthma count of households persons                                       | 5.97<br>(0.30)  | 5.97<br>(0.30)  |
| health adults 2017 alcohol current infrequent count of households persons                             | 10.18<br>(0.46) | 10.18<br>(0.46) |
| health adults 2017 alcohol current regular count of households persons                                | 39.84<br>(2.05) | 39.84<br>(2.05) |
| health adults 2017 body mass index underweight count of households persons                            | 1.41<br>(0.06)  | 1.41<br>(0.06)  |
| health adults 2017 hay fever count of households persons                                              | 6.49<br>(0.35)  | 6.49<br>(0.35)  |
| health adults 2017 body mass index healthy weight count of households persons                         | 25.77<br>(1.27) | 25.77<br>(1.27) |
| health adults 2017 body mass index overweight count of households persons                             | 25.45<br>(1.20) | 25.45<br>(1.20) |
| health adults 2017 body mass index obese count of households persons                                  | 22.63<br>(1.44) | 22.63<br>(1.44) |
| health adults 2017 all persons without a usual place of health care count of households persons       | 10.43<br>(0.56) | 10.43<br>(0.56) |
| health adults 2017 all persons with a usual place of health care count of households persons          | 66.76<br>(3.15) | 66.76<br>(3.15) |
| health adults 2017 type doctor s office or hmo count of households persons                            | 48.81<br>(2.49) | 48.81<br>(2.49) |

|                                                                                                                                                      |                 |                 |
|------------------------------------------------------------------------------------------------------------------------------------------------------|-----------------|-----------------|
| health adults 2017 type clinic or health center count of households persons                                                                          | 15.26<br>(0.87) | 15.26<br>(0.87) |
| health adults 2017 type some other place count of households persons                                                                                 | 0.71<br>(0.04)  | 0.71<br>(0.04)  |
| health adults 2017 office visits in the past 12 months none count of households persons                                                              | 13.49<br>(0.63) | 13.49<br>(0.63) |
| health adults 2017 sinusitis count of households persons                                                                                             | 9.55<br>(0.53)  | 9.55<br>(0.53)  |
| health adults 2017 office visits in the past 12 months 1 count of households persons                                                                 | 13.23<br>(0.57) | 13.23<br>(0.57) |
| health adults 2017 office visits in the past 12 months 2 3 count of households persons                                                               | 20.45<br>(0.97) | 20.45<br>(0.97) |
| health adults 2017 office visits in the past 12 months 4 9 count of households persons                                                               | 18.51<br>(1.12) | 18.51<br>(1.12) |
| health adults 2017 office visits in the past 12 months 10 or more count of households persons                                                        | 10.87<br>(0.66) | 10.87<br>(0.66) |
| health adults 2017 last doctor visit 6 months or less count of households persons                                                                    | 53.62<br>(2.77) | 53.62<br>(2.76) |
| health adults 2017 last doctor visit more than six months but less than 1 year count of households persons                                           | 10.63<br>(0.46) | 10.63<br>(0.46) |
| health adults 2017 last doctor visit more than 1 year but not more than 2 years ago count of households persons                                      | 5.86<br>(0.30)  | 5.86<br>(0.30)  |
| health adults 2017 last doctor visit more than 2 years but less than 5 years ago count of households persons                                         | 3.49<br>(0.16)  | 3.49<br>(0.16)  |
| health adults 2017 last doctor visit more than 5 years excluding never count of households persons                                                   | 2.14<br>(0.11)  | 2.13<br>(0.11)  |
| health adults 2017 last doctor visit never count of households persons                                                                               | 0.79<br>(0.06)  | 0.79<br>(0.06)  |
| health children 2017 number school days missed in past 12 months due to illness or injury aged 5 17 none count of households persons                 | 26.59<br>(1.50) | 26.60<br>(1.51) |
| health children 2017 number school days missed in past 12 months due to illness or injury aged 5 17 1 2 days count of households persons             | 29.22<br>(0.30) | 29.22<br>(0.30) |
| health children 2017 number school days missed in past 12 months due to illness or injury aged 5 17 3 5 days count of households persons             | 24.24<br>(0.10) | 24.24<br>(0.10) |
| health children 2017 number school days missed in past 12 months due to illness or injury aged 5 17 6 10 days count of households persons            | 9.63<br>(0.12)  | 9.63<br>(0.12)  |
| health children 2017 number school days missed in past 12 months due to illness or injury aged 5 17 11 or more days count of households persons      | 4.09<br>(0.11)  | 4.09<br>(0.11)  |
| health children 2017 number school days missed in past 12 months due to illness or injury aged 5 17 did not go to school count of households persons | 0.38<br>(0.53)  | 0.38<br>(0.53)  |
| health children 2017 emergency room visits in past 12 months for children under 18 none count of households persons                                  | 82.62<br>(0.51) | 82.62<br>(0.51) |
| health children 2017 emergency room visits in past 12 months for children under 18 one count of households persons                                   | 11.50<br>(0.27) | 11.50<br>(0.27) |
| health children 2017 emergency room visits in past 12 months for children under 18 two or more count of households persons                           | 5.36<br>(0.31)  | 5.36<br>(0.31)  |
| health children 2017 children receiving special education or early intervention services count of households persons                                 | 7.85<br>(0.08)  | 7.85<br>(0.08)  |
| health children 2017 ever told had asthma count of households persons                                                                                | 12.95<br>(0.28) | 12.96<br>(0.28) |

|                                                                                                                                     |                  |                  |
|-------------------------------------------------------------------------------------------------------------------------------------|------------------|------------------|
| health children 2017 still have asthma count of households persons                                                                  | 8.34<br>(0.36)   | 8.34<br>(0.36)   |
| health children 2017 hay fever count of households persons                                                                          | 8.40<br>(0.15)   | 8.40<br>(0.15)   |
| health children 2017 respiratory allergies count of households persons                                                              | 10.11<br>(0.14)  | 10.11<br>(0.14)  |
| health children 2017 food allergies count of households persons                                                                     | 5.77<br>(0.10)   | 5.77<br>(0.10)   |
| health children 2017 skin allergies count of households persons                                                                     | 11.91<br>(0.39)  | 11.91<br>(0.39)  |
| health children 2017 children 3 to 17 learning disability count of households persons                                               | 7.26<br>(0.15)   | 7.26<br>(0.15)   |
| health children 2017 children 3 to 17 attention deficit hyperactivity disorder count of households persons                          | 9.50<br>(0.19)   | 9.50<br>(0.19)   |
| health children 2017 prescription medication taken regularly for at least 3 months count of households persons                      | 13.19<br>(0.22)  | 13.19<br>(0.22)  |
| health children 2017 excellent health status respondent assessed count of households persons                                        | 58.07<br>(1.25)  | 58.07<br>(1.25)  |
| health children 2017 very good health status respondent assessed count of households persons                                        | 25.23<br>(0.20)  | 25.23<br>(0.20)  |
| health children 2017 good health status respondent assessed count of households persons                                             | 13.36<br>(1.02)  | 13.35<br>(1.02)  |
| health children 2017 fair or poor health status respondent assessed count of households persons                                     | 1.73<br>(0.16)   | 1.73<br>(0.16)   |
| health children 2017 all persons without a usual place of health care count of households persons                                   | 3.95<br>(0.20)   | 3.95<br>(0.20)   |
| health children 2017 all persons with a usual place of health care count of households persons                                      | 95.94<br>(0.20)  | 95.94<br>(0.20)  |
| health children 2017 all persons with a usual place of health care clinic count of households persons                               | 23.95<br>(1.96)  | 23.94<br>(1.96)  |
| health children 2017 all persons with a usual place of health care doctor s office count of households persons                      | 70.27<br>(2.42)  | 70.28<br>(2.43)  |
| health children 2017 all persons with a usual place of health care emergency room count of households persons                       | 0.43<br>(0.07)   | 0.43<br>(0.07)   |
| health children 2017 all persons with a usual place of health care hospital outpatient count of households persons                  | 0.72<br>(0.09)   | 0.72<br>(0.09)   |
| health children 2017 all persons with a usual place of health care some other place count of households persons                     | 0.29<br>(0.08)   | 0.29<br>(0.08)   |
| health children 2017 last health care professional visit 6 months or less count of households persons                               | 76.36<br>(0.20)  | 76.36<br>(0.20)  |
| health children 2017 last health care professional visit more than six months but less than 1 year count of households persons      | 15.76<br>(0.12)  | 15.76<br>(0.12)  |
| health children 2017 last health care professional visit more than 1 year but not more than 2 years ago count of households persons | 4.34<br>(0.10)   | 4.34<br>(0.10)   |
| health children 2017 last health care professional visit more than 2 years but less than 5 years ago count of households persons    | 0.94<br>(0.04)   | 0.94<br>(0.04)   |
| health children 2017 last health care professional visit more than 5 years count of households persons                              | 1.69<br>(0.11)   | 1.69<br>(0.11)   |
| health children 2017 uninsured for health care count of households persons                                                          | 29.46<br>(49.34) | 29.71<br>(49.40) |

|                                                                                                                                              |                 |                 |
|----------------------------------------------------------------------------------------------------------------------------------------------|-----------------|-----------------|
| health children 2017 unmet medical need count of households persons                                                                          | 1.39<br>(0.10)  | 1.39<br>(0.10)  |
| health children 2017 delayed care due to cost count of households persons                                                                    | 2.36<br>(0.12)  | 2.36<br>(0.12)  |
| health children 2017 children 2 17 years yes unmet dental need count of households persons                                                   | 4.12<br>(0.21)  | 4.12<br>(0.21)  |
| health children 2017 children 2 17 years no unmet dental need count of households persons                                                    | 94.95<br>(0.15) | 94.95<br>(0.15) |
| health children 2017 children 2 17 years less than 6 months since last dental visit count of households persons                              | 66.87<br>(0.45) | 66.87<br>(0.45) |
| health children 2017 children 2 17 years more than 6 months but less than 1 year since last dental visit count of households persons         | 16.59<br>(0.32) | 16.59<br>(0.32) |
| health children 2017 children 2 17 years more than 1 year but not more than 2 years since last dental visit count of households persons      | 5.34<br>(0.19)  | 5.34<br>(0.19)  |
| health children 2017 children 2 17 years more than 2 years but not more than 5 years ago since last dental visit count of households persons | 1.95<br>(0.08)  | 1.95<br>(0.08)  |
| health children 2017 children 2 17 years more than 5 years since last dental visit count of households persons                               | 7.67<br>(0.40)  | 7.67<br>(0.41)  |

HH=Household

Fam=Family

Pop=Population

Non Fam=Non family

OT=Other

ER=Emergency room

RV=recreational vehicle

Equip=equipment

Misc.=miscellaneous

BCBS=Blue Cross Blue Shield

OOT=Out of town

RIHC=resource intensive healthcare
