# Supplementary material for: Can diverse population characteristics be leveraged in a machine learning pipeline to predict resource intensive healthcare utilization among hospital service areas?
Source: Springer Nature journal article supplement (doi:10.1186/s12913-022-08154-4), 2022-06-30
Supplement: MOESM5 [file 23224174]

## Additional File 5. Descriptive Statistics for Adult & Child Disease/Health Candidate Predictors (second order terms)

- Additional File 5
  - File format: PDF
  - File title: Descriptive Statistics for Adult & Child Disease/Health Candidate Predictors (second order terms)
  - File description: Long table with univariate results for second order terms

| ER Visits (mean(SD))                                                                                                                                                                                                            |                     |
|---------------------------------------------------------------------------------------------------------------------------------------------------------------------------------------------------------------------------------|---------------------|
| health adults 2017 prostate cancer count of households persons health children 2017 uninsured for health care count of households persons                                                                                       | 24.99<br>(38.10)    |
| health adults 2017 kidney disease count of households persons health children 2017 uninsured for health care count of households persons                                                                                        | 45.38<br>(70.05)    |
| health adults 2017 coronary count of households persons health children 2017 uninsured for health care count of households persons                                                                                              | 141.69<br>(217.86)  |
| health adults 2017 emphysema count of households persons health children 2017 uninsured for health care count of households persons                                                                                             | 33.59<br>(51.59)    |
| health adults 2017 last doctor visit more than six months but less than 1 year count of households persons health children 2017 uninsured for health care count of households persons                                           | 311.00<br>(514.07)  |
| health adults 2017 last doctor visit more than 1 year but not more than 2 years ago count of households persons health children 2017 uninsured for health care count of households persons                                      | 172.52<br>(288.08)  |
| health children 2017 number school days missed in past 12 months due to illness or injury aged 5 17 none count of households persons health children 2017 uninsured for health care count of households persons                 | 787.07<br>(1320.29) |
| health children 2017 number school days missed in past 12 months due to illness or injury aged 5 17 6 10 days count of households persons health children 2017 uninsured for health care count of households persons            | 283.41<br>(473.53)  |
| health children 2017 number school days missed in past 12 months due to illness or injury aged 5 17 11 or more days count of households persons health children 2017 uninsured for health care count of households persons      | 119.82<br>(198.80)  |
| health children 2017 number school days missed in past 12 months due to illness or injury aged 5 17 did not go to school count of households persons health children 2017 uninsured for health care count of households persons | 3.13<br>(0.36)      |
| health children 2017 still have asthma count of households persons health children 2017 uninsured for health care count of households persons                                                                                   | 246.11<br>(410.35)  |
| health children 2017 skin allergies count of households persons health children 2017 uninsured for health care count of households persons                                                                                      | 351.76<br>(588.98)  |
| health children 2017 last health care professional visit more than 2 years but less than 5 years ago count of households persons health children 2017 uninsured for health care count of households persons                     | 27.63<br>(45.76)    |
| health children 2017 delayed care due to cost count of households persons health children 2017 uninsured for health care count of households persons                                                                            | 68.70<br>(112.69)   |
| Inpatient Days (mean(SD))                                                                                                                                                                                                       |                     |
| health adults 2017 prostate cancer count of households persons health children 2017 uninsured for health care count of households persons                                                                                       | 25.21<br>(38.20)    |

|                                                                                                                                                                                                                                 |                     |
|---------------------------------------------------------------------------------------------------------------------------------------------------------------------------------------------------------------------------------|---------------------|
| health adults 2017 kidney disease count of households persons health children 2017 uninsured for health care count of households persons                                                                                        | 45.76<br>(70.19)    |
| health adults 2017 coronary count of households persons health children 2017 uninsured for health care count of households persons                                                                                              | 142.91<br>(218.34)  |
| health adults 2017 emphysema count of households persons health children 2017 uninsured for health care count of households persons                                                                                             | 33.87<br>(51.69)    |
| health adults 2017 last doctor visit more than six months but less than 1 year count of households persons health children 2017 uninsured for health care count of households persons                                           | 313.77<br>(514.91)  |
| health adults 2017 last doctor visit more than 1 year but not more than 2 years ago count of households persons health children 2017 uninsured for health care count of households persons                                      | 174.06<br>(288.52)  |
| health children 2017 number school days missed in past 12 months due to illness or injury aged 5 17 none count of households persons health children 2017 uninsured for health care count of households persons                 | 794.12<br>(1322.01) |
| health children 2017 number school days missed in past 12 months due to illness or injury aged 5 17 1 2 days count of households persons health children 2017 uninsured for health care count of households persons             | 870.44<br>(1453.82) |
| health children 2017 number school days missed in past 12 months due to illness or injury aged 5 17 6 10 days count of households persons health children 2017 uninsured for health care count of households persons            | 285.82<br>(474.06)  |
| health children 2017 number school days missed in past 12 months due to illness or injury aged 5 17 11 or more days count of households persons health children 2017 uninsured for health care count of households persons      | 120.83<br>(199.02)  |
| health children 2017 number school days missed in past 12 months due to illness or injury aged 5 17 did not go to school count of households persons health children 2017 uninsured for health care count of households persons | 3.13<br>(0.36)      |
| health children 2017 still have asthma count of households persons health children 2017 uninsured for health care count of households persons                                                                                   | 248.29<br>(410.88)  |
| health children 2017 skin allergies count of households persons health children 2017 uninsured for health care count of households persons                                                                                      | 354.85<br>(589.71)  |
| health children 2017 last health care professional visit more than 2 years but less than 5 years ago count of households persons health children 2017 uninsured for health care count of households persons                     | 27.86<br>(45.81)    |
| health children 2017 delayed care due to cost count of households persons health children 2017 uninsured for health care count of households persons                                                                            | 69.26<br>(112.81)   |
| Hospital Expenditures (mean(SD))                                                                                                                                                                                                |                     |
| health adults 2017 prostate cancer count of households persons health children 2017 uninsured for health care count of households persons                                                                                       | 25.21<br>(38.20)    |
| health adults 2017 kidney disease count of households persons health children 2017 uninsured for health care count of households persons                                                                                        | 45.76<br>(70.19)    |
| health adults 2017 coronary count of households persons health children 2017 uninsured for health care count of households persons                                                                                              | 142.91<br>(218.34)  |
| health adults 2017 emphysema count of households persons health children 2017 uninsured for health care count of households persons                                                                                             | 33.87<br>(51.69)    |
| health adults 2017 last doctor visit more than six months but less than 1 year count of households persons health children 2017 uninsured for health care count of households persons                                           | 313.77<br>(514.91)  |
| health adults 2017 last doctor visit more than 1 year but not more than 2 years ago count of households persons health children 2017 uninsured for health care count of households persons                                      | 174.06<br>(288.52)  |
| health children 2017 number school days missed in past 12 months due to illness or injury aged 5 17 none count of households persons health children 2017 uninsured for health care count of households persons                 | 794.12<br>(1322.01) |

|                                                                                                                                                                                                                                       |                     |
|---------------------------------------------------------------------------------------------------------------------------------------------------------------------------------------------------------------------------------------|---------------------|
| health children 2017 number school days missed in past 12 months due to illness or injury aged 5 17 1<br>2 days count of households persons health children 2017 uninsured for health care count of households<br>persons             | 870.44<br>(1453.82) |
| health children 2017 number school days missed in past 12 months due to illness or injury aged 5 17 6<br>10 days count of households persons health children 2017 uninsured for health care count of<br>households persons            | 285.82<br>(474.06)  |
| health children 2017 number school days missed in past 12 months due to illness or injury aged 5 17<br>11 or more days count of households persons health children 2017 uninsured for health care count of<br>households persons      | 120.83<br>(199.02)  |
| health children 2017 number school days missed in past 12 months due to illness or injury aged 5 17<br>did not go to school count of households persons health children 2017 uninsured for health care count<br>of households persons | 3.13<br>(0.36)      |
| health children 2017 still have asthma count of households persons health children 2017 uninsured for<br>health care count of households persons                                                                                      | 248.29<br>(410.88)  |
| health children 2017 skin allergies count of households persons health children 2017 uninsured for<br>health care count of households persons                                                                                         | 354.85<br>(589.71)  |
| health children 2017 last health care professional visit more than 2 years but less than 5 years ago<br>count of households persons health children 2017 uninsured for health care count of households<br>persons                     | 27.86<br>(45.81)    |
| health children 2017 delayed care due to cost count of households persons health children 2017<br>uninsured for health care count of households persons                                                                               | 69.26<br>(112.81)   |

HH=Household

Fam=Family

Pop=Population

Non Fam=Non family

OT=Other

ER=Emergency room

RV=recreational vehicle

Equip=equipment

Misc.=miscellaneous

BCBS=Blue Cross Blue Shield

OOT=Out of town

RIHC=resource intensive healthcare
