# Supplementary material for: Can diverse population characteristics be leveraged in a machine learning pipeline to predict resource intensive healthcare utilization among hospital service areas?
Source: Springer Nature journal article supplement (doi:10.1186/s12913-022-08154-4), 2022-06-30
Supplement: MOESM6 [file 23224174]

## Additional File 6. Descriptive Statistics for Community Characteristics (Main Effects)

- Additional File 6
  - File format: PDF
  - File title: Descriptive Statistics for Community Characteristics (Main Effects)
  - File description: Long table with univariate results for main effects

|                                                                                    | ER<br>Visist                   | Inpatien<br>t Days<br>&<br>Hospita<br>l<br>Expend<br>itures |
|------------------------------------------------------------------------------------|--------------------------------|-------------------------------------------------------------|
| n                                                                                  | 3153                           | 3174                                                        |
| hsanum                                                                             | 26296.6<br>3<br>(14813.<br>77) | 26281.3<br>6<br>(14809.<br>53)                              |
| census employment 2017 employment car truck van to work empl 16 persons            | 46.10<br>(7.08)                | 46.13<br>(7.08)                                             |
| census employment 2017 employment car truck van to work alone empl 16 persons      | 40.56<br>(6.74)                | 40.59<br>(6.74)                                             |
| census employment 2017 employment car truck van to work carpool empl 16 persons    | 5.54<br>(1.74)                 | 5.54<br>(1.74)                                              |
| census employment 2017 employment public transportation to work empl 16 persons    | 0.94<br>(2.40)                 | 0.94<br>(2.39)                                              |
| census employment 2017 employment bus or trolley bus to work empl 16 persons       | 0.60<br>(1.22)                 | 0.60<br>(1.22)                                              |
| census employment 2017 employment streetcar or trolley car to work empl 16 persons | 0.01<br>(0.06)                 | 0.01<br>(0.06)                                              |
| census employment 2017 employment subway or elevated to work empl 16 persons       | 0.16<br>(1.24)                 | 0.16<br>(1.24)                                              |
| census employment 2017 employment railroad to work empl 16 persons                 | 0.16<br>(0.72)                 | 0.16<br>(0.73)                                              |
| census employment 2017 employment ferry to work empl 16 persons                    | 0.01<br>(0.09)                 | 0.01<br>(0.09)                                              |
| census employment 2017 employment taxi to work empl 16 persons                     | 0.05<br>(0.16)                 | 0.05<br>(0.16)                                              |
| census employment 2017 employment motorcycle to work empl 16 persons               | 0.12<br>(0.16)                 | 0.12<br>(0.16)                                              |
| census employment 2017 employment bicycle to work empl 16 persons                  | 0.27<br>(0.50)                 | 0.27<br>(0.50)                                              |
| census employment 2017 employment walked to work empl 16 persons                   | 1.81<br>(1.69)                 | 1.80<br>(1.69)                                              |

|                                                                                              |                 |                 |
|----------------------------------------------------------------------------------------------|-----------------|-----------------|
| census employment 2017 employment other transportation to work empl 16 persons               | 0.50<br>(0.60)  | 0.50<br>(0.60)  |
| census employment 2017 employment work at home empl 16 persons                               | 2.41<br>(1.46)  | 2.41<br>(1.45)  |
| census employment 2017 employment travel time less than 15 min empl 16 persons               | 20.31<br>(8.57) | 20.28<br>(8.55) |
| census employment 2017 employment travel time 15 29 min empl 16 persons                      | 14.71<br>(5.07) | 14.73<br>(5.08) |
| census employment 2017 employment travel time 30 59 min empl 16 persons                      | 11.00<br>(5.29) | 11.02<br>(5.29) |
| census employment 2017 employment travel time 60 89 min empl 16 persons                      | 2.48<br>(1.83)  | 2.48<br>(1.83)  |
| census employment 2017 employment travel time 90 min empl 16 persons                         | 1.30<br>(0.92)  | 1.30<br>(0.92)  |
| census employment 2017 employment potential pop 16 persons                                   | 98.38<br>(0.33) | 98.38<br>(0.33) |
| census employment 2017 employment civilian males pop 16 persons                              | 27.46<br>(4.50) | 27.47<br>(4.50) |
| census employment 2017 employment civilian females pop 16 persons                            | 24.74<br>(3.70) | 24.75<br>(3.70) |
| census employment 2017 employment armed forces male pop 16 persons                           | 0.27<br>(1.20)  | 0.27<br>(1.20)  |
| census employment 2017 employment armed forces female pop 16 persons                         | 0.04<br>(0.17)  | 0.04<br>(0.17)  |
| census employment 2017 employment unemployed males pop 16 persons                            | 1.38<br>(0.38)  | 1.38<br>(0.38)  |
| census employment 2017 employment unemployed female pop 16 persons                           | 1.24<br>(0.34)  | 1.24<br>(0.34)  |
| census employment 2017 employment not in the labor force male pop 16 persons                 | 19.24<br>(5.10) | 19.23<br>(5.09) |
| census employment 2017 employment not in the labor force female pop 16 persons               | 24.00<br>(3.81) | 24.00<br>(3.81) |
| census employment 2017 employment civilian total pop 16 persons                              | 52.20<br>(7.59) | 52.22<br>(7.58) |
| census employment 2017 employment agriculture forestry fishing and hunting pop 16 persons    | 1.82<br>(2.54)  | 1.81<br>(2.54)  |
| census employment 2017 employment mining quarrying and oil and gas extraction pop 16 persons | 0.70<br>(1.76)  | 0.69<br>(1.76)  |
| census employment 2017 employment construction pop 16 persons                                | 3.45<br>(1.29)  | 3.45<br>(1.29)  |
| census employment 2017 employment manufacturing pop 16 persons                               | 6.16<br>(3.70)  | 6.16<br>(3.70)  |
| census employment 2017 employment wholesale trade pop 16 persons                             | 1.31<br>(0.68)  | 1.31<br>(0.68)  |
| census employment 2017 employment retail trade pop 16 persons                                | 6.12<br>(1.48)  | 6.12<br>(1.48)  |
| census employment 2017 employment transportation and warehousing pop 16 persons              | 2.06<br>(0.99)  | 2.07<br>(0.99)  |
| census employment 2017 employment utilities pop 16 persons                                   | 0.62<br>(0.57)  | 0.62<br>(0.56)  |

|                                                                                                      |                 |                 |
|------------------------------------------------------------------------------------------------------|-----------------|-----------------|
| census employment 2017 employment information pop 16 persons                                         | 0.89<br>(0.56)  | 0.89<br>(0.57)  |
| census employment 2017 employment finance and insurance pop 16 persons                               | 1.96<br>(1.13)  | 1.96<br>(1.13)  |
| census employment 2017 employment real estate and rental and leasing pop 16 persons                  | 0.76<br>(0.49)  | 0.76<br>(0.49)  |
| census employment 2017 employment professional scientific and technical services pop 16 persons      | 2.27<br>(1.90)  | 2.28<br>(1.91)  |
| census employment 2017 employment management of companies and enterprises pop 16 persons             | 0.03<br>(0.06)  | 0.03<br>(0.06)  |
| census employment 2017 employment administrative and support and waste mgt services pop 16 persons   | 1.76<br>(0.84)  | 1.77<br>(0.84)  |
| census employment 2017 employment educational services pop 16 persons                                | 4.97<br>(2.13)  | 4.97<br>(2.13)  |
| census employment 2017 employment health care and social assistance pop 16 persons                   | 7.45<br>(1.95)  | 7.45<br>(1.95)  |
| census employment 2017 employment arts entertainment and recreation pop 16 persons                   | 1.00<br>(0.85)  | 0.99<br>(0.85)  |
| census employment 2017 employment accommodation and food services pop 16 persons                     | 3.58<br>(1.56)  | 3.58<br>(1.55)  |
| census employment 2017 employment other services pop 16 persons                                      | 2.54<br>(0.77)  | 2.54<br>(0.77)  |
| census employment 2017 employment public administration pop 16 persons                               | 2.75<br>(1.52)  | 2.75<br>(1.52)  |
| census employment 2017 occupation management business and financial operations pop 16 persons        | 6.77<br>(2.81)  | 6.78<br>(2.82)  |
| census employment 2017 occupation professional and related pop 16 persons                            | 10.18<br>(3.39) | 10.20<br>(3.40) |
| census employment 2017 occupation sales and office pop 16 persons                                    | 11.80<br>(2.49) | 11.81<br>(2.48) |
| census employment 2017 occupation service pop 16 persons                                             | 9.88<br>(2.15)  | 9.88<br>(2.15)  |
| census employment 2017 occupation farming fishing and forestry pop 16 persons                        | 0.82<br>(1.27)  | 0.82<br>(1.27)  |
| census employment 2017 occupation construction extraction and maintenance pop 16 persons             | 5.07<br>(1.88)  | 5.07<br>(1.88)  |
| census employment 2017 occupation production transportation and material moving pop 16 persons       | 7.68<br>(3.14)  | 7.68<br>(3.14)  |
| census employment 2017 employment white collar pop 16 persons                                        | 28.75<br>(7.20) | 28.78<br>(7.22) |
| census employment 2017 employment blue collar pop 16 persons                                         | 12.75<br>(3.94) | 12.74<br>(3.93) |
| census employment 2017 employment private for profit wage and salary workers employee pop 16 persons | 33.27<br>(6.89) | 33.30<br>(6.89) |
| census employment 2017 employment private for profit wage and salary workers self pop 16 persons     | 1.85<br>(0.99)  | 1.86<br>(0.99)  |
| census employment 2017 employment private not for profit wage and salary workers pop 16 persons      | 4.33<br>(1.95)  | 4.33<br>(1.95)  |
| census employment 2017 employment local government workers pop 16 persons                            | 4.41<br>(1.77)  | 4.41<br>(1.76)  |

|                                                                                                         |                            |                            |
|---------------------------------------------------------------------------------------------------------|----------------------------|----------------------------|
| census employment 2017 employment state government workers pop 16 persons                               | 3.01<br>(1.95)             | 3.01<br>(1.95)             |
| census employment 2017 employment federal government workers pop 16 persons                             | 1.34<br>(1.43)             | 1.34<br>(1.43)             |
| census employment 2017 employment self employed workers in own not incorporated business pop 16 persons | 3.87<br>(1.96)             | 3.86<br>(1.95)             |
| census employment 2017 employment unpaid family workers pop 16 persons                                  | 0.12<br>(0.19)             | 0.12<br>(0.19)             |
| census housing units 2017 housing median year built count year                                          | 423.46<br>(447.00)         | 424.81<br>(447.74)         |
| census housing units 2017 housing median year moved in count year                                       | 429.81<br>(454.16)         | 431.17<br>(454.91)         |
| census housing units 2017 housing median rent count                                                     | 117.66<br>(136.53)         | 118.43<br>(137.03)         |
| census housing units 2017 housing median value owner households count                                   | 31401.5<br>0<br>(47291.45) | 31612.8<br>0<br>(47387.75) |
| census housing units 2017 home heating fuel utility gas count housing units                             | 37.62<br>(22.88)           | 37.70<br>(22.88)           |
| census housing units 2017 home heating fuel bottled tank or lp gas count housing units                  | 7.52<br>(6.94)             | 7.49<br>(6.93)             |
| census housing units 2017 home heating fuel electricity count housing units                             | 30.68<br>(20.34)           | 30.66<br>(20.32)           |
| census housing units 2017 home heating fuel fuel oil kerosene etc count housing units                   | 5.07<br>(11.00)            | 5.09<br>(11.03)            |
| census housing units 2017 home heating fuel coal or coke count housing units                            | 0.16<br>(0.70)             | 0.16<br>(0.70)             |
| census housing units 2017 home heating fuel wood count housing units                                    | 3.51<br>(5.01)             | 3.49<br>(5.00)             |
| census housing units 2017 home heating fuel solar energy count housing units                            | 0.04<br>(0.13)             | 0.04<br>(0.13)             |
| census housing units 2017 home heating fuel other fuel count housing units                              | 0.56<br>(0.74)             | 0.56<br>(0.74)             |
| census housing units 2017 home heating fuel no fuel used count housing units                            | 0.61<br>(3.55)             | 0.61<br>(3.54)             |
| census housing units 2017 housing occupied units count housing units                                    | 85.76<br>(9.22)            | 85.80<br>(9.21)            |
| census housing units 2017 housing vacant units count housing units                                      | 14.24<br>(9.22)            | 14.20<br>(9.21)            |
| census housing units 2017 housing vacant units for rent count housing units                             | 2.90<br>(1.25)             | 2.90<br>(1.25)             |
| census housing units 2017 housing vacant units rented not occupied count housing units                  | 0.17<br>(0.11)             | 0.17<br>(0.11)             |
| census housing units 2017 housing vacant units for sale count housing units                             | 1.43<br>(0.57)             | 1.43<br>(0.57)             |

|                                                                                                            |                  |                  |
|------------------------------------------------------------------------------------------------------------|------------------|------------------|
| census housing units 2017 housing vacant units sold not occupied count housing units                       | 0.42<br>(0.32)   | 0.42<br>(0.32)   |
| census housing units 2017 housing vacant units seasonal recreational or occasional use count housing units | 5.14<br>(8.36)   | 5.12<br>(8.34)   |
| census housing units 2017 housing vacant units for migrant workers count housing units                     | 0.04<br>(0.13)   | 0.04<br>(0.13)   |
| census housing units 2017 housing vacant units vacant other count housing units                            | 4.14<br>(2.89)   | 4.13<br>(2.89)   |
| census housing units 2017 housing structure with 1 unit detached count housing units                       | 58.67<br>(10.59) | 58.67<br>(10.60) |
| census housing units 2017 housing structure with 1 unit attached count housing units                       | 3.16<br>(4.04)   | 3.18<br>(4.05)   |
| census housing units 2017 housing structure with 2 units count housing units                               | 3.01<br>(2.76)   | 3.02<br>(2.76)   |
| census housing units 2017 housing structure with 3 4 units count housing units                             | 3.37<br>(2.31)   | 3.38<br>(2.33)   |
| census housing units 2017 housing structure with 5 9 units count housing units                             | 3.20<br>(2.19)   | 3.21<br>(2.19)   |
| census housing units 2017 housing structure with 10 19 units count housing units                           | 2.46<br>(2.35)   | 2.47<br>(2.36)   |
| census housing units 2017 housing structure with 20 49 units count housing units                           | 1.91<br>(2.03)   | 1.91<br>(2.04)   |
| census housing units 2017 housing structure with 50 units count housing units                              | 1.86<br>(2.94)   | 1.87<br>(2.93)   |
| census housing units 2017 housing structure mobile home count housing units                                | 8.02<br>(6.65)   | 8.01<br>(6.66)   |
| census housing units 2017 housing structure boat rv van other count housing units                          | 0.08<br>(0.22)   | 0.08<br>(0.22)   |
| census housing units 2017 housing rent less than 250 count housing units                                   | 2.90<br>(2.37)   | 2.90<br>(2.37)   |
| census housing units 2017 housing rent 250 499 count housing units                                         | 7.74<br>(4.94)   | 7.72<br>(4.93)   |
| census housing units 2017 housing rent 500 749 count housing units                                         | 7.46<br>(4.80)   | 7.47<br>(4.81)   |
| census housing units 2017 housing rent 750 999 count housing units                                         | 3.44<br>(3.63)   | 3.46<br>(3.64)   |
| census housing units 2017 housing rent 1000 1249 count housing units                                       | 1.89<br>(2.80)   | 1.90<br>(2.81)   |
| census housing units 2017 housing rent 1250 1499 count housing units                                       | 1.14<br>(2.11)   | 1.15<br>(2.12)   |
| census housing units 2017 housing rent 1500 1999 count housing units                                       | 0.90<br>(1.96)   | 0.91<br>(1.98)   |
| census housing units 2017 housing rent 2000 count housing units                                            | 0.58<br>(1.52)   | 0.58<br>(1.53)   |
| census housing units 2017 housing no cash rent count housing units                                         | 2.61<br>(1.67)   | 2.60<br>(1.67)   |
| census housing units 2017 housing owner households valued less than 10000 count housing units              | 1.28<br>(1.09)   | 1.28<br>(1.10)   |
| census housing units 2017 housing owner households valued 10000 14999 count housing units                  | 0.92<br>(0.82)   | 0.92<br>(0.82)   |

|                                                                                                 |                 |                 |
|-------------------------------------------------------------------------------------------------|-----------------|-----------------|
| census housing units 2017 housing owner households valued 15000 19999 count housing units       | 0.82<br>(0.78)  | 0.82<br>(0.78)  |
| census housing units 2017 housing owner households valued 20000 24999 count housing units       | 0.90<br>(0.91)  | 0.90<br>(0.91)  |
| census housing units 2017 housing owner households valued 25000 29999 count housing units       | 0.83<br>(0.87)  | 0.82<br>(0.87)  |
| census housing units 2017 housing owner households valued 30000 34999 count housing units       | 1.01<br>(1.04)  | 1.01<br>(1.04)  |
| census housing units 2017 housing owner households valued 35000 39999 count housing units       | 0.74<br>(0.80)  | 0.74<br>(0.80)  |
| census housing units 2017 housing owner households valued 40000 49999 count housing units       | 1.90<br>(1.73)  | 1.89<br>(1.73)  |
| census housing units 2017 housing owner households valued 50000 59999 count housing units       | 2.21<br>(1.82)  | 2.21<br>(1.83)  |
| census housing units 2017 housing owner households valued 60000 69999 count housing units       | 2.46<br>(1.92)  | 2.45<br>(1.92)  |
| census housing units 2017 housing owner households valued 70000 79999 count housing units       | 2.70<br>(1.94)  | 2.70<br>(1.94)  |
| census housing units 2017 housing owner households valued 80000 89999 count housing units       | 2.98<br>(1.95)  | 2.97<br>(1.95)  |
| census housing units 2017 housing owner households valued 90000 99999 count housing units       | 2.39<br>(1.56)  | 2.38<br>(1.56)  |
| census housing units 2017 housing owner households valued 100000 124999 count housing units     | 5.47<br>(2.78)  | 5.46<br>(2.78)  |
| census housing units 2017 housing owner households valued 125000 149999 count housing units     | 4.14<br>(2.33)  | 4.14<br>(2.33)  |
| census housing units 2017 housing owner households valued 150000 174999 count housing units     | 5.09<br>(2.50)  | 5.09<br>(2.50)  |
| census housing units 2017 housing owner households valued 175000 199999 count housing units     | 3.10<br>(1.91)  | 3.10<br>(1.92)  |
| census housing units 2017 housing owner households valued 200000 249999 count housing units     | 4.87<br>(2.95)  | 4.87<br>(2.96)  |
| census housing units 2017 housing owner households valued 250000 299999 count housing units     | 3.72<br>(2.84)  | 3.74<br>(2.86)  |
| census housing units 2017 housing owner households valued 300000 399999 count housing units     | 4.05<br>(4.23)  | 4.07<br>(4.25)  |
| census housing units 2017 housing owner households valued 400000 499999 count housing units     | 1.95<br>(2.82)  | 1.97<br>(2.85)  |
| census housing units 2017 housing owner households valued 500000 749999 count housing units     | 2.08<br>(3.80)  | 2.10<br>(3.83)  |
| census housing units 2017 housing owner households valued 750000 999999 count housing units     | 0.72<br>(1.77)  | 0.73<br>(1.78)  |
| census housing units 2017 housing owner households valued more than 1000000 count housing units | 0.75<br>(2.06)  | 0.75<br>(2.06)  |
| census housing units 2017 housing built 2010 or later count housing units                       | 9.12<br>(3.60)  | 9.11<br>(3.59)  |
| census housing units 2017 housing built 2000 to 2009 count housing units                        | 10.88<br>(6.58) | 10.88<br>(6.58) |
| census housing units 2017 housing built 1990 to 1999 count housing units                        | 12.38<br>(5.53) | 12.37<br>(5.53) |

|                                                                                       |                  |                  |
|---------------------------------------------------------------------------------------|------------------|------------------|
| census housing units 2017 housing built 1980 to 1989 count housing units              | 12.27<br>(5.07)  | 12.27<br>(5.07)  |
| census housing units 2017 housing built 1970 to 1979 count housing units              | 15.37<br>(4.40)  | 15.37<br>(4.40)  |
| census housing units 2017 housing built 1960 to 1969 count housing units              | 10.19<br>(3.77)  | 10.20<br>(3.78)  |
| census housing units 2017 housing built 1950 to 1959 count housing units              | 10.03<br>(5.24)  | 10.05<br>(5.27)  |
| census housing units 2017 housing built 1940 to 1949 count housing units              | 5.19<br>(2.91)   | 5.19<br>(2.92)   |
| census housing units 2017 housing built 1939 or earlier count housing units           | 14.58<br>(11.32) | 14.56<br>(11.33) |
| census housing units 2017 housing year moved in 2010 or later count housing units     | 37.94<br>(7.44)  | 37.96<br>(7.45)  |
| census housing units 2017 housing year moved in 2000 to 2009 count housing units      | 22.06<br>(3.93)  | 22.06<br>(3.92)  |
| census housing units 2017 housing year moved in 1990 to 1999 count housing units      | 11.78<br>(2.17)  | 11.79<br>(2.17)  |
| census housing units 2017 housing year moved in 1980 to 1989 count housing units      | 6.33<br>(1.70)   | 6.33<br>(1.70)   |
| census housing units 2017 housing year moved in 1970 to 1979 count housing units      | 4.77<br>(1.80)   | 4.77<br>(1.80)   |
| census housing units 2017 housing year moved in 1969 or earlier count housing units   | 2.88<br>(1.47)   | 2.88<br>(1.48)   |
| census housing units 2017 housing owner occupied count housing units                  | 57.10<br>(8.75)  | 57.12<br>(8.76)  |
| census housing units 2017 housing renter occupied count housing units                 | 28.66<br>(8.69)  | 28.68<br>(8.71)  |
| census housing units 2017 housing owner households with mortgage any count households | 33.97<br>(9.21)  | 34.00<br>(9.22)  |
| census housing units 2017 housing owner households with no mortgage count households  | 23.13<br>(7.11)  | 23.11<br>(7.12)  |

HH=Household

Fam=Family

Pop=Population

Non Fam=Non family

OT=Other

ER=Emergency room

RV=recreational vehicle

Equip=equipment

Misc.=miscellaneous

BCBS=Blue Cross Blue Shield

OOT=Out of town

RIHC=resource intensive healthcare
