# Supplementary material for: Can diverse population characteristics be leveraged in a machine learning pipeline to predict resource intensive healthcare utilization among hospital service areas?
Source: Springer Nature journal article supplement (doi:10.1186/s12913-022-08154-4), 2022-06-30
Supplement: MOESM7 [file 23224174]

## Additional File 7. Descriptive Statistics for Community Characteristics Candidate Predictors (second order terms)

- Additional File 7
  - File format: PDF
  - File title: Descriptive Statistics for Community Characteristics Candidate Predictors (second order terms)
  - File description: Long table with univariate results for second order terms

| ER visits (mean(SD))                                                                                                                                  |                              |
|-------------------------------------------------------------------------------------------------------------------------------------------------------|------------------------------|
| census employment 2017 employment subway or elevated to work empl 16 persons census housing units 2017 housing median year built count year           | 42.18<br>(334.89)            |
| census employment 2017 employment taxi to work empl 16 persons census housing units 2017 housing median year built count year                         | 15.08 (83.51)                |
| census employment 2017 employment travel time less than 15 min empl 16 persons census housing units 2017 housing median year built count year         | 9075.14<br>(11924.06)        |
| census employment 2017 employment travel time 15 29 min empl 16 persons census housing units 2017 housing median year built count year                | 5525.01<br>(5886.52)         |
| census housing units 2017 housing median year moved in count year census housing units 2017 housing median year built count year                      | 384947.03<br>(892775.48)     |
| census housing units 2017 housing median rent count census housing units 2017 housing median year built count year                                    | 99150.16<br>(251620.19)      |
| census housing units 2017 housing median value owner households count census housing units 2017 housing median year built count year                  | 26324942.93<br>(82379823.39) |
| census housing units 2017 home heating fuel utility gas count housing units census housing units 2017 housing median year built count year            | 15114.46<br>(20573.02)       |
| census housing units 2017 home heating fuel bottled tank or lp gas count housing units census housing units 2017 housing median year built count year | 3886.15<br>(6984.29)         |
| census housing units 2017 home heating fuel coal or coke count housing units census housing units 2017 housing median year built count year           | 47.61<br>(243.16)            |
| census housing units 2017 housing structure with 1 unit attached count housing units census housing units 2017 housing median year built count year   | 1029.20<br>(1893.05)         |
| census housing units 2017 housing rent 250 499 count housing units census housing units 2017 housing median year built count year                     | 3525.11<br>(4931.95)         |
| census housing units 2017 housing year moved in 2010 or later count housing units census housing units 2017 housing median year built count year      | 15293.80<br>(16033.74)       |
| census housing units 2017 housing year moved in 2000 to 2009 count housing units census housing units 2017 housing median year built count year       | 9135.93<br>(9758.09)         |
| census housing units 2017 housing renter occupied count housing units census housing units 2017 housing median year built count year                  | 11353.02<br>(12468.35)       |
| Inpatient Days (mean(SD))                                                                                                                             |                              |
| census employment 2017 employment subway or elevated to work empl 16 persons census housing units 2017 housing median year built count year           | 42.16<br>(333.86)            |
| census employment 2017 employment taxi to work empl 16 persons census housing units 2017 housing median year built count year                         | 15.26 (83.62)                |

|                                                                                                                                                                        |                               |
|------------------------------------------------------------------------------------------------------------------------------------------------------------------------|-------------------------------|
| census employment 2017 employment walked to work empl 16 persons census housing units 2017 housing median year built count year                                        | 823.67<br>(1776.68)           |
| census employment 2017 employment travel time less than 15 min empl 16 persons census housing units 2017 housing median year built count year                          | 9077.06<br>(11898.16)         |
| census employment 2017 employment travel time 15 29 min empl 16 persons census housing units 2017 housing median year built count year                                 | 5569.28<br>(5974.90)          |
| census employment 2017 employment agriculture forestry fishing and hunting pop 16 persons census housing units 2017 housing median year built count year               | 1099.21<br>(2722.27)          |
| census employment 2017 employment health care and social assistance pop 16 persons census housing units 2017 housing median year built count year                      | 3116.20<br>(3640.09)          |
| census employment 2017 occupation management business and financial operations pop 16 persons census housing units 2017 housing median year built count year           | 2837.98<br>(3568.27)          |
| census employment 2017 employment self employed workers in own not incorporated business pop 16 persons census housing units 2017 housing median year built count year | 1834.13<br>(2747.16)          |
| census housing units 2017 housing median value owner households count census housing units 2017 housing median year built count year                                   | 26518156.05<br>(82499483.95 ) |
| census housing units 2017 housing median year moved in count year census housing units 2017 housing median year built count year                                       | 386775.46<br>(894670.02)      |
| census housing units 2017 housing median rent count census housing units 2017 housing median year built count year                                                     | 99910.52<br>(252381.00)       |
| census housing units 2017 home heating fuel fuel oil kerosene etc count housing units census housing units 2017 housing median year built count year                   | 1647.19<br>(5123.77)          |
| census housing units 2017 housing vacant units vacant other count housing units census housing units 2017 housing median year built count year                         | 2137.99<br>(3694.65)          |
| census housing units 2017 housing year moved in 2000 to 2009 count housing units census housing units 2017 housing median year built count year                        | 9168.37<br>(9777.28)          |
| Hospital Expenditures (mean(SD))                                                                                                                                       |                               |
| census employment 2017 employment subway or elevated to work empl 16 persons census housing units 2017 housing median year built count year                            | 42.16<br>(333.86)             |
| census employment 2017 employment taxi to work empl 16 persons census housing units 2017 housing median year built count year                                          | 15.26 (83.62)                 |
| census employment 2017 employment walked to work empl 16 persons census housing units 2017 housing median year built count year                                        | 823.67<br>(1776.68)           |
| census employment 2017 employment travel time less than 15 min empl 16 persons census housing units 2017 housing median year built count year                          | 9077.06<br>(11898.16)         |
| census employment 2017 employment travel time 15 29 min empl 16 persons census housing units 2017 housing median year built count year                                 | 5569.28<br>(5974.90)          |
| census employment 2017 employment agriculture forestry fishing and hunting pop 16 persons census housing units 2017 housing median year built count year               | 1099.21<br>(2722.27)          |
| census employment 2017 employment health care and social assistance pop 16 persons census housing units 2017 housing median year built count year                      | 3116.20<br>(3640.09)          |
| census employment 2017 occupation management business and financial operations pop 16 persons census housing units 2017 housing median year built count year           | 2837.98<br>(3568.27)          |
| census employment 2017 employment self employed workers in own not incorporated business pop 16 persons census housing units 2017 housing median year built count year | 1834.13<br>(2747.16)          |

|                                                                                                                                                      |                              |
|------------------------------------------------------------------------------------------------------------------------------------------------------|------------------------------|
| census housing units 2017 housing median value owner households count census housing units 2017 housing median year built count year                 | 26518156.05<br>(82499483.95) |
| census housing units 2017 housing median year moved in count year census housing units 2017 housing median year built count year                     | 386775.46<br>(894670.02)     |
| census housing units 2017 housing median rent count census housing units 2017 housing median year built count year                                   | 99910.52<br>(252381.00)      |
| census housing units 2017 home heating fuel fuel oil kerosene etc count housing units census housing units 2017 housing median year built count year | 1647.19<br>(5123.77)         |
| census housing units 2017 housing vacant units vacant other count housing units census housing units 2017 housing median year built count year       | 2137.99<br>(3694.65)         |
| census housing units 2017 housing year moved in 2000 to 2009 count housing units census housing units 2017 housing median year built count year      | 9168.37<br>(9777.28)         |

HH=Household

Fam=Family

Pop=Population

Non Fam=Non family

OT=Other

ER=Emergency room

RV=recreational vehicle

Equip=equipment

Misc.=miscellaneous

BCBS=Blue Cross Blue Shield

OOT=Out of town

RIHC=resource intensive healthcare
