# Supplementary material for: Can diverse population characteristics be leveraged in a machine learning pipeline to predict resource intensive healthcare utilization among hospital service areas?
Source: Springer Nature journal article supplement (doi:10.1186/s12913-022-08154-4), 2022-06-30
Supplement: MOESM8 [file 23224174]

## Additional File 8. Descriptive Statistics for Consumer Expenditures (Main Effects)

- Additional File 8
  - File format: PDF
  - File title: Descriptive Statistics for Consumer Expenditures (Main Effects)
  - File description: Long table with univariate results for main effects

|                                                                                                    | ER Visits           | Inpatient Days & Hospital Expenditures |
|----------------------------------------------------------------------------------------------------|---------------------|----------------------------------------|
| n                                                                                                  | 3153                | 3174                                   |
| expenditures food 2017 cola                                                                        | 29.12<br>(3.82)     | 29.10 (3.82)                           |
| expenditures food 2017 other carbonated drinks                                                     | 28.20<br>(3.46)     | 28.19 (3.46)                           |
| expenditures food 2017 tea                                                                         | 12.69<br>(1.53)     | 12.69 (1.53)                           |
| expenditures food 2017 coffee                                                                      | 36.28<br>(5.55)     | 36.26 (5.55)                           |
| expenditures food 2017 noncarbonated fruit flavored drinks including non frozen lemonade           | 9.10<br>(1.01)      | 9.09 (1.01)                            |
| expenditures food 2017 bottled water                                                               | 23.74<br>(2.15)     | 23.74 (2.15)                           |
| expenditures food 2017 sports drinks                                                               | 6.84<br>(0.78)      | 6.84 (0.78)                            |
| expenditures food 2017 nonalcoholic beer                                                           | 0.08<br>(0.02)      | 0.08 (0.02)                            |
| expenditures food 2017 food prepared by consumer unit on out of town trips                         | 22.27<br>(4.09)     | 22.27 (4.09)                           |
| expenditures food 2017 food away from home                                                         | 1252.36<br>(188.61) | 1252.33<br>(188.94)                    |
| expenditures food 2017 meals at restaurants carry outs and other                                   | 1064.55<br>(152.36) | 1064.49<br>(152.59)                    |
| expenditures food 2017 lunch                                                                       | 333.26<br>(45.28)   | 333.25<br>(45.35)                      |
| expenditures food 2017 lunch at fast food take out delivery concession stands buffet and cafeteria | 158.62<br>(18.06)   | 158.61<br>(18.08)                      |
| expenditures food 2017 lunch at full service restaurants                                           | 141.57<br>(22.71)   | 141.56<br>(22.76)                      |
| expenditures food 2017 lunch at vending machines and mobile vendors                                | 5.44<br>(0.66)      | 5.44 (0.66)                            |
| expenditures food 2017 lunch at employer and school cafeterias                                     | 27.52<br>(3.47)     | 27.52 (3.48)                           |

|                                                                                                                                |                    |                    |
|--------------------------------------------------------------------------------------------------------------------------------|--------------------|--------------------|
| expenditures food 2017 dinner                                                                                                  | 515.22<br>(78.77)  | 515.19<br>(78.90)  |
| expenditures food 2017 dinner at fast food take out delivery concession stands buffet and cafeteria                            | 180.83<br>(20.98)  | 180.79<br>(20.98)  |
| expenditures food 2017 dinner at full service restaurants                                                                      | 348.38<br>(61.18)  | 348.26<br>(61.29)  |
| expenditures food 2017 dinner at vending machines and mobile vendors                                                           | 1.70<br>(0.21)     | 1.70 (0.21)        |
| expenditures food 2017 dinner at employer and school cafeterias                                                                | 2.43<br>(0.39)     | 2.43 (0.40)        |
| expenditures food 2017 snacks and nonalcoholic beverages                                                                       | 95.26<br>(12.77)   | 95.23<br>(12.78)   |
| expenditures food 2017 snacks and nonalcoholic beverages at fast food take out delivery concession stands buffet and cafeteria | 60.98<br>(8.65)    | 60.96 (8.66)       |
| expenditures food 2017 snacks and nonalcoholic beverages at full service restaurants                                           | 20.98<br>(2.77)    | 20.97 (2.77)       |
| expenditures food 2017 snacks and nonalcoholic beverages at vending machines and mobile vendors                                | 9.10<br>(1.13)     | 9.10 (1.13)        |
| expenditures food 2017 snacks and nonalcoholic beverages at employer and school cafeterias                                     | 4.30<br>(0.53)     | 4.30 (0.53)        |
| expenditures food 2017 breakfast and brunch                                                                                    | 126.28<br>(16.66)  | 126.23<br>(16.67)  |
| expenditures food 2017 breakfast and brunch at fast food take out delivery concession stands buffet and cafeteria              | 68.02<br>(8.49)    | 68.00 (8.49)       |
| expenditures food 2017 breakfast and brunch at full service restaurants                                                        | 49.52<br>(6.96)    | 49.50 (6.97)       |
| expenditures food 2017 breakfast and brunch at vending machines and mobile vendors                                             | 3.09<br>(0.48)     | 3.09 (0.48)        |
| expenditures food 2017 breakfast and brunch at employer and school cafeterias                                                  | 5.43<br>(0.70)     | 5.43 (0.70)        |
| expenditures food 2017 food or board at school                                                                                 | 13.18<br>(1.94)    | 13.17 (1.95)       |
| expenditures food 2017 catered affairs                                                                                         | 15.78<br>(3.61)    | 15.77 (3.62)       |
| expenditures food 2017 education                                                                                               | 608.32<br>(106.05) | 608.42<br>(106.22) |
| expenditures food 2017 college tuition                                                                                         | 368.90<br>(70.13)  | 368.97<br>(70.22)  |
| expenditures food 2017 elementary and high school tuition                                                                      | 87.30<br>(19.02)   | 87.34<br>(19.06)   |
| expenditures food 2017 vocational and technical school tuition                                                                 | 2.87<br>(0.64)     | 2.87 (0.64)        |
| expenditures food 2017 test preparation tutoring services                                                                      | 7.81<br>(2.33)     | 7.82 (2.33)        |
| expenditures food 2017 other schools tuition                                                                                   | 3.80<br>(0.86)     | 3.80 (0.86)        |
| expenditures food 2017 other school expenses including rentals                                                                 | 19.80<br>(3.19)    | 19.80 (3.19)       |
| expenditures food 2017 school books supplies equipment for college                                                             | 19.07<br>(3.49)    | 19.06 (3.49)       |

|                                                                                             |                   |                   |
|---------------------------------------------------------------------------------------------|-------------------|-------------------|
| expenditures food 2017 school books supplies equipment for elementary high school           | 7.10<br>(1.13)    | 7.09 (1.13)       |
| expenditures food 2017 school books supplies equipment for vocational and technical schools | 0.22<br>(0.05)    | 0.22 (0.05)       |
| expenditures food 2017 school books supplies equipment for day care nursery                 | 0.15<br>(0.03)    | 0.15 (0.03)       |
| expenditures food 2017 eggs                                                                 | 25.91<br>(2.98)   | 25.90 (2.98)      |
| expenditures food 2017 dairy products                                                       | 171.52<br>(23.66) | 171.42<br>(23.69) |
| expenditures food 2017 fresh milk and cream                                                 | 58.33<br>(7.44)   | 58.30 (7.44)      |
| expenditures food 2017 fresh milk all types                                                 | 49.05<br>(6.08)   | 49.02 (6.09)      |
| expenditures food 2017 cream                                                                | 9.40<br>(1.45)    | 9.40 (1.45)       |
| expenditures food 2017 other dairy products                                                 | 113.37<br>(16.36) | 113.30<br>(16.39) |
| expenditures food 2017 butter                                                               | 10.62<br>(1.45)   | 10.62 (1.45)      |
| expenditures food 2017 cheese                                                               | 56.04<br>(8.68)   | 56.00 (8.69)      |
| expenditures food 2017 ice cream and related products                                       | 22.02<br>(2.99)   | 22.01 (3.00)      |
| expenditures food 2017 miscellaneous dairy products                                         | 24.62<br>(3.40)   | 24.61 (3.40)      |
| expenditures food 2017 fruits and vegetables                                                | 321.57<br>(41.38) | 321.45<br>(41.41) |
| expenditures food 2017 fresh fruits                                                         | 119.42<br>(16.22) | 119.37<br>(16.24) |
| expenditures food 2017 apples                                                               | 17.55<br>(2.46)   | 17.54 (2.46)      |
| expenditures food 2017 bananas                                                              | 17.86<br>(2.24)   | 17.85 (2.24)      |
| expenditures food 2017 oranges                                                              | 12.61<br>(1.50)   | 12.61 (1.50)      |
| expenditures food 2017 citrus fruits excluding oranges                                      | 18.54<br>(2.60)   | 18.54 (2.60)      |
| expenditures food 2017 food on out of town trips                                            | 130.81<br>(22.17) | 130.81<br>(22.19) |
| expenditures food 2017 school lunches                                                       | 26.39<br>(4.47)   | 26.39 (4.49)      |
| expenditures food 2017 meals as pay                                                         | 11.30<br>(2.59)   | 11.30 (2.60)      |
| expenditures food 2017 alcoholic beverages                                                  | 218.21<br>(35.21) | 218.19<br>(35.28) |
| expenditures food 2017 alcoholic beverages at home                                          | 121.31<br>(18.92) | 121.30<br>(18.97) |
| expenditures food 2017 beer and ale                                                         | 49.88<br>(8.38)   | 49.88 (8.41)      |

|                                                               |                  |                  |
|---------------------------------------------------------------|------------------|------------------|
| expenditures food 2017 whiskey                                | 4.97<br>(0.80)   | 4.97 (0.81)      |
| expenditures food 2017 wine                                   | 56.93<br>(9.95)  | 56.93 (9.96)     |
| expenditures food 2017 other alcoholic beverages              | 9.93<br>(1.61)   | 9.92 (1.61)      |
| expenditures food 2017 alcoholic beverages away from home     | 97.00<br>(16.76) | 96.99<br>(16.78) |
| expenditures food 2017 beer and ale away                      | 31.67<br>(5.39)  | 31.67 (5.40)     |
| expenditures food 2017 wine away                              | 18.96<br>(3.66)  | 18.96 (3.66)     |
| expenditures food 2017 other alcoholic beverages away         | 20.28<br>(3.56)  | 20.28 (3.56)     |
| expenditures food 2017 alcoholic beverages purchased on trips | 25.76<br>(4.78)  | 25.76 (4.79)     |
| expenditures food 2017 other beef                             | 8.74<br>(1.27)   | 8.73 (1.27)      |
| expenditures food 2017 pork                                   | 67.18<br>(8.19)  | 67.16 (8.19)     |
| expenditures food 2017 bacon                                  | 15.53<br>(1.94)  | 15.52 (1.94)     |
| expenditures food 2017 pork chops                             | 10.08<br>(1.55)  | 10.08 (1.55)     |
| expenditures food 2017 ham                                    | 12.73<br>(1.55)  | 12.72 (1.55)     |
| expenditures food 2017 sausage                                | 14.08<br>(1.71)  | 14.07 (1.71)     |
| expenditures food 2017 other pork                             | 14.74<br>(1.84)  | 14.74 (1.84)     |
| expenditures food 2017 other meats                            | 51.67<br>(6.36)  | 51.65 (6.36)     |
| expenditures food 2017 frankfurters                           | 9.37<br>(1.19)   | 9.37 (1.20)      |
| expenditures food 2017 lunch meats cold cuts                  | 35.97<br>(4.76)  | 35.95 (4.76)     |
| expenditures food 2017 lamb organ meats and others            | 6.28<br>(0.93)   | 6.28 (0.93)      |
| expenditures food 2017 poultry                                | 71.17<br>(8.73)  | 71.15 (8.73)     |
| expenditures food 2017 fresh and frozen chickens              | 57.45<br>(6.97)  | 57.43 (6.97)     |
| expenditures food 2017 other poultry                          | 13.62<br>(1.83)  | 13.62 (1.84)     |
| expenditures food 2017 fish and seafood                       | 52.83<br>(6.86)  | 52.83 (6.86)     |
| expenditures food 2017 canned fish and seafood                | 7.90<br>(0.97)   | 7.89 (0.97)      |
| expenditures food 2017 fresh fish and shellfish               | 26.68<br>(3.75)  | 26.68 (3.75)     |

|                                                                 |                   |                   |
|-----------------------------------------------------------------|-------------------|-------------------|
| expenditures food 2017 frozen fish and shellfish                | 18.30<br>(2.33)   | 18.29 (2.33)      |
| expenditures food 2017 other fresh fruits                       | 52.84<br>(6.95)   | 52.82 (6.96)      |
| expenditures food 2017 fresh vegetables                         | 103.99<br>(13.30) | 103.95<br>(13.31) |
| expenditures food 2017 potatoes                                 | 16.04<br>(2.10)   | 16.04 (2.10)      |
| expenditures food 2017 lettuce                                  | 13.72<br>(1.76)   | 13.72 (1.76)      |
| expenditures food 2017 tomatoes                                 | 17.89<br>(2.33)   | 17.88 (2.33)      |
| expenditures food 2017 other fresh vegetables                   | 56.35<br>(7.61)   | 56.33 (7.61)      |
| expenditures food 2017 processed fruits                         | 44.53<br>(5.63)   | 44.52 (5.63)      |
| expenditures food 2017 frozen fruits and fruit juices           | 5.39<br>(0.74)    | 5.39 (0.74)       |
| expenditures food 2017 canned fruits                            | 8.09<br>(1.07)    | 8.08 (1.07)       |
| expenditures food 2017 dried fruit                              | 3.35<br>(0.47)    | 3.35 (0.47)       |
| expenditures food 2017 fresh fruit juice                        | 5.66<br>(0.71)    | 5.66 (0.71)       |
| expenditures food 2017 canned and bottled fruit juice           | 22.22<br>(3.09)   | 22.21 (3.09)      |
| expenditures food 2017 processed vegetables                     | 53.63<br>(6.90)   | 53.61 (6.90)      |
| expenditures food 2017 frozen vegetables                        | 14.25<br>(1.86)   | 14.24 (1.86)      |
| expenditures food 2017 canned and dried vegetables and juices   | 39.39<br>(5.04)   | 39.38 (5.04)      |
| expenditures food 2017 other food at home                       | 585.99<br>(74.83) | 585.75<br>(74.88) |
| expenditures food 2017 sugar and other sweets                   | 64.01<br>(8.85)   | 63.99 (8.85)      |
| expenditures food 2017 candy and chewing gum                    | 43.17<br>(6.76)   | 43.15 (6.77)      |
| expenditures food 2017 rice                                     | 11.06<br>(2.11)   | 11.07 (2.11)      |
| expenditures food 2017 pasta cornmeal and other cereal products | 15.67<br>(2.00)   | 15.66 (2.00)      |
| expenditures food 2017 bakery products                          | 142.20<br>(18.98) | 142.13<br>(18.98) |
| expenditures food 2017 bread                                    | 42.09<br>(5.52)   | 42.07 (5.52)      |
| expenditures food 2017 cookies and crackers                     | 35.16<br>(4.71)   | 35.15 (4.71)      |
| expenditures food 2017 frozen and refrigerated bakery products  | 11.35<br>(1.48)   | 11.35 (1.48)      |

|                                                          |                     |                     |
|----------------------------------------------------------|---------------------|---------------------|
| expenditures food 2017 cakes and cupcakes                | 14.96<br>(1.85)     | 14.95 (1.85)        |
| expenditures food 2017 bread and cracker products        | 2.39<br>(0.34)      | 2.38 (0.34)         |
| expenditures food 2017 sweetrolls coffee cakes doughnuts | 9.18<br>(1.15)      | 9.17 (1.15)         |
| expenditures food 2017 pies tarts turnovers              | 6.43<br>(0.91)      | 6.42 (0.92)         |
| expenditures food 2017 meats poultry fish and eggs       | 369.33<br>(44.43)   | 369.21<br>(44.43)   |
| expenditures food 2017 beef                              | 100.43<br>(12.86)   | 100.39<br>(12.87)   |
| expenditures food 2017 ground beef                       | 43.20<br>(5.52)     | 43.17 (5.52)        |
| expenditures food 2017 roast                             | 14.84<br>(1.98)     | 14.83 (1.98)        |
| expenditures food 2017 steak                             | 34.38<br>(4.94)     | 34.37 (4.94)        |
| expenditures food 2017 food                              | 2952.02<br>(379.16) | 2951.06<br>(379.41) |
| expenditures food 2017 food at home                      | 1665.24<br>(215.51) | 1664.64<br>(215.57) |
| expenditures food 2017 cereals and bakery products       | 215.16<br>(28.02)   | 215.09<br>(28.03)   |
| expenditures food 2017 cereals and cereal products       | 73.19<br>(9.52)     | 73.17 (9.53)        |
| expenditures food 2017 flour                             | 3.75<br>(0.50)      | 3.75 (0.50)         |
| expenditures food 2017 prepared flour mixes              | 5.38<br>(0.79)      | 5.38 (0.79)         |
| expenditures food 2017 ready to eat and cooked cereals   | 37.05<br>(4.95)     | 37.03 (4.95)        |
| expenditures food 2017 sugar                             | 7.45<br>(1.21)      | 7.45 (1.21)         |
| expenditures food 2017 artificial sweeteners             | 1.74<br>(0.28)      | 1.74 (0.28)         |
| expenditures food 2017 jams preserves other sweets       | 12.21<br>(1.81)     | 12.20 (1.82)        |
| expenditures food 2017 fats and oils etc                 | 45.25<br>(6.04)     | 45.23 (6.05)        |
| expenditures food 2017 margarine                         | 2.49<br>(0.36)      | 2.49 (0.36)         |
| expenditures food 2017 fats and oils                     | 14.32<br>(1.90)     | 14.31 (1.90)        |
| expenditures food 2017 salad dressings                   | 11.58<br>(1.57)     | 11.58 (1.57)        |
| expenditures food 2017 nondairy cream and imitation milk | 8.06<br>(1.18)      | 8.06 (1.18)         |
| expenditures food 2017 peanut butter                     | 8.74<br>(1.29)      | 8.74 (1.30)         |

|                                                                 |                   |                   |
|-----------------------------------------------------------------|-------------------|-------------------|
| expenditures food 2017 miscellaneous foods                      | 303.99<br>(41.68) | 303.83<br>(41.78) |
| expenditures food 2017 frozen prepared foods                    | 53.85<br>(7.23)   | 53.83 (7.24)      |
| expenditures food 2017 canned and packaged soups                | 18.40<br>(2.49)   | 18.39 (2.49)      |
| expenditures food 2017 potato chips nuts and other snacks       | 71.27<br>(9.96)   | 71.23 (9.98)      |
| expenditures food 2017 condiments and seasonings                | 58.44<br>(8.27)   | 58.41 (8.29)      |
| expenditures food 2017 other canned and packaged prepared foods | 102.13<br>(14.02) | 102.07<br>(14.05) |
| expenditures food 2017 prepared salads                          | 16.74<br>(2.32)   | 16.73 (2.33)      |
| expenditures food 2017 prepared desserts                        | 5.42<br>(0.76)    | 5.42 (0.76)       |
| expenditures food 2017 baby food                                | 13.79<br>(2.13)   | 13.78 (2.13)      |
| expenditures food 2017 nonalcoholic beverages                   | 152.98<br>(20.67) | 152.91<br>(20.71) |
| expenditures home 2017 housewares                               | 33.15<br>(5.74)   | 33.14 (5.75)      |
| expenditures home 2017 flatware                                 | 1.93<br>(0.48)    | 1.93 (0.48)       |
| expenditures home 2017 nonelectric cookware                     | 9.33<br>(1.68)    | 9.32 (1.68)       |
| expenditures home 2017 tableware nonelectric kitchenware        | 9.90<br>(1.74)    | 9.90 (1.74)       |
| expenditures home 2017 small appliances                         | 15.56<br>(2.51)   | 15.56 (2.51)      |
| expenditures home 2017 small electric kitchen appliances        | 11.96<br>(2.00)   | 11.96 (2.00)      |
| expenditures home 2017 portable heating and cooling equipment   | 3.63<br>(0.61)    | 3.63 (0.61)       |
| expenditures home 2017 miscellaneous household equipment        | 328.02<br>(57.81) | 327.99<br>(57.93) |
| expenditures home 2017 window coverings                         | 7.45<br>(2.02)    | 7.45 (2.02)       |
| expenditures home 2017 infants equipment                        | 11.93<br>(1.96)   | 11.93 (1.96)      |
| expenditures home 2017 laundry and cleaning equipment           | 9.01<br>(1.44)    | 9.01 (1.44)       |
| expenditures home 2017 outdoor equipment                        | 8.98<br>(2.17)    | 8.97 (2.18)       |
| expenditures home 2017 clocks and decorative items              | 57.10<br>(12.00)  | 57.08<br>(12.03)  |
| expenditures home 2017 telephones and accessories               | 22.02<br>(5.62)   | 22.04 (5.63)      |
| expenditures home 2017 lawn and garden equipment                | 22.97<br>(4.24)   | 22.96 (4.24)      |

|                                                                             |                    |                    |
|-----------------------------------------------------------------------------|--------------------|--------------------|
| expenditures home 2017 power tools                                          | 13.58<br>(2.48)    | 13.57 (2.49)       |
| expenditures home 2017 office furniture for home use                        | 3.06<br>(1.02)     | 3.06 (1.02)        |
| expenditures home 2017 hand tools                                           | 6.08<br>(1.03)     | 6.08 (1.03)        |
| expenditures home 2017 indoor plants fresh flowers                          | 19.82<br>(3.73)    | 19.82 (3.73)       |
| expenditures home 2017 closet and storage items                             | 8.21<br>(1.61)     | 8.21 (1.61)        |
| expenditures home 2017 rental of furniture                                  | 2.05<br>(0.77)     | 2.05 (0.77)        |
| expenditures home 2017 luggage                                              | 5.97<br>(0.94)     | 5.97 (0.94)        |
| expenditures home 2017 computers and computer hardware for non business use | 55.54<br>(9.51)    | 55.53 (9.52)       |
| expenditures home 2017 portable memory                                      | 2.00<br>(0.33)     | 2.00 (0.33)        |
| expenditures home 2017 computer software                                    | 9.82<br>(1.84)     | 9.82 (1.85)        |
| expenditures home 2017 computer accessories                                 | 13.81<br>(2.47)    | 13.80 (2.47)       |
| expenditures home 2017 internet services away from home                     | 2.54<br>(0.42)     | 2.54 (0.42)        |
| expenditures home 2017 business equipment for home use                      | 1.72<br>(0.29)     | 1.72 (0.30)        |
| expenditures home 2017 other hardware                                       | 8.29<br>(1.87)     | 8.29 (1.87)        |
| expenditures home 2017 miscellaneous household equipment and parts          | 18.25<br>(3.00)    | 18.25 (3.01)       |
| expenditures home 2017 apparel and services                                 | 773.66<br>(140.48) | 773.72<br>(140.70) |
| expenditures home 2017 men and boys                                         | 178.55<br>(29.95)  | 178.55<br>(29.98)  |
| expenditures home 2017 men 16 and over                                      | 138.61<br>(24.16)  | 138.62<br>(24.19)  |
| expenditures home 2017 mens suits                                           | 10.74<br>(2.97)    | 10.75 (2.98)       |
| expenditures home 2017 mens sportcoats tailored jackets                     | 3.44<br>(1.01)     | 3.44 (1.01)        |
| expenditures home 2017 mens coats and jackets                               | 10.22<br>(1.66)    | 10.22 (1.66)       |
| expenditures home 2017 mens underwear                                       | 13.42<br>(2.20)    | 13.41 (2.20)       |
| expenditures home 2017 mens hosiery                                         | 7.09<br>(1.17)     | 7.09 (1.17)        |
| expenditures home 2017 mens nightwear                                       | 0.85<br>(0.15)     | 0.85 (0.15)        |
| expenditures home 2017 mens accessories                                     | 13.01<br>(2.22)    | 13.01 (2.22)       |



|                                                                 |                    |                    |
|-----------------------------------------------------------------|--------------------|--------------------|
| expenditures home 2017 mens active sportswear                   | 10.97<br>(1.92)    | 10.97 (1.92)       |
| expenditures home 2017 mens pants and shorts                    | 32.24<br>(5.49)    | 32.24 (5.49)       |
| expenditures home 2017 mens uniforms                            | 1.22<br>(0.20)     | 1.22 (0.20)        |
| expenditures home 2017 mens costumes                            | 0.52<br>(0.10)     | 0.52 (0.10)        |
| expenditures home 2017 boys 2 to 15                             | 42.53<br>(7.73)    | 42.53 (7.73)       |
| expenditures home 2017 boys coats and jackets                   | 2.68<br>(0.45)     | 2.68 (0.45)        |
| expenditures home 2017 boys underwear                           | 5.18<br>(0.80)     | 5.18 (0.80)        |
| expenditures home 2017 boys nightwear                           | 0.44<br>(0.07)     | 0.44 (0.07)        |
| expenditures home 2017 boys hosiery                             | 2.50<br>(0.45)     | 2.50 (0.45)        |
| expenditures home 2017 boys accessories                         | 2.82<br>(0.69)     | 2.82 (0.69)        |
| expenditures home 2017 boys suits sportcoats vests              | 0.50<br>(0.10)     | 0.50 (0.10)        |
| expenditures home 2017 boys pants and shorts                    | 10.77<br>(2.35)    | 10.77 (2.35)       |
| expenditures home 2017 boys costumes                            | 0.45<br>(0.07)     | 0.45 (0.07)        |
| expenditures home 2017 women and girls                          | 290.68<br>(49.24)  | 290.68<br>(49.30)  |
| expenditures home 2017 women 16 and over                        | 247.03<br>(42.13)  | 247.03<br>(42.18)  |
| expenditures home 2017 womens coats and jackets                 | 13.35<br>(2.25)    | 13.35 (2.25)       |
| expenditures home 2017 womens dresses                           | 30.33<br>(5.74)    | 30.33 (5.74)       |
| expenditures home 2017 womens sportcoats tailored jackets       | 3.74<br>(1.52)     | 3.75 (1.53)        |
| expenditures home 2017 womens skirts                            | 4.83<br>(0.87)     | 4.83 (0.87)        |
| expenditures home 2017 womens pants and shorts                  | 34.77<br>(5.84)    | 34.77 (5.85)       |
| expenditures home 2017 interest paid home equity line of credit | 38.75<br>(7.86)    | 38.74 (7.87)       |
| expenditures home 2017 property taxes                           | 822.77<br>(142.28) | 822.62<br>(142.42) |
| expenditures home 2017 maintenance repairs ins other exp owned  | 593.42<br>(97.48)  | 593.22<br>(97.55)  |
| expenditures home 2017 homeowners and related insurance         | 171.58<br>(28.80)  | 171.50<br>(28.82)  |
| expenditures home 2017 ground rent                              | 22.45<br>(5.91)    | 22.42 (5.91)       |

|                                                                                                  |                     |                     |
|--------------------------------------------------------------------------------------------------|---------------------|---------------------|
| expenditures home 2017 maintenance and repair services owned                                     | 300.71<br>(51.38)   | 300.66<br>(51.42)   |
| expenditures home 2017 rent                                                                      | 1299.80<br>(443.96) | 1300.03<br>(444.29) |
| expenditures home 2017 rent as pay                                                               | 32.95<br>(12.34)    | 32.95<br>(12.34)    |
| expenditures home 2017 maintenance insurance and other expenses rented                           | 42.63<br>(9.06)     | 42.65 (9.07)        |
| expenditures home 2017 tenants insurance                                                         | 7.82<br>(2.39)      | 7.82 (2.39)         |
| expenditures home 2017 other lodging                                                             | 318.03<br>(74.65)   | 318.15<br>(74.79)   |
| expenditures home 2017 owned vacation homes                                                      | 112.43<br>(27.53)   | 112.48<br>(27.59)   |
| expenditures home 2017 utilities fuels and public services                                       | 1533.85<br>(241.94) | 1533.45<br>(241.91) |
| expenditures home 2017 natural gas                                                               | 166.26<br>(27.19)   | 166.24<br>(27.18)   |
| expenditures home 2017 electricity                                                               | 569.60<br>(92.64)   | 569.43<br>(92.63)   |
| expenditures home 2017 fuel oil and other fuels                                                  | 46.66<br>(8.25)     | 46.64 (8.26)        |
| expenditures home 2017 fuel oil                                                                  | 25.22<br>(4.10)     | 25.21 (4.11)        |
| expenditures home 2017 coal wood and other fuels                                                 | 3.38<br>(0.78)      | 3.38 (0.78)         |
| expenditures home 2017 bottled gas                                                               | 18.12<br>(3.66)     | 18.11 (3.66)        |
| expenditures home 2017 telephone services                                                        | 536.93<br>(84.13)   | 536.81<br>(84.13)   |
| expenditures home 2017 cell phone service                                                        | 412.27<br>(64.21)   | 412.19<br>(64.21)   |
| expenditures home 2017 water and other public services                                           | 216.86<br>(33.13)   | 216.80<br>(33.13)   |
| expenditures home 2017 household operations                                                      | 566.13<br>(95.01)   | 566.14<br>(95.08)   |
| expenditures home 2017 personal services                                                         | 212.48<br>(36.92)   | 212.49<br>(36.94)   |
| expenditures home 2017 other household expenses                                                  | 361.34<br>(61.96)   | 361.35<br>(62.00)   |
| expenditures home 2017 housekeeping services                                                     | 68.28<br>(21.87)    | 68.33<br>(21.93)    |
| expenditures home 2017 gardening lawn care service                                               | 54.26<br>(10.85)    | 54.26<br>(10.87)    |
| expenditures home 2017 water softening service                                                   | 3.02<br>(0.45)      | 3.02 (0.45)         |
| expenditures home 2017 household laundry and dry cleaning sent out nonclothing not coin operated | 7.67<br>(1.86)      | 7.68 (1.86)         |
| expenditures home 2017 coin operated household laundry and dry cleaning nonclothing              | 3.80<br>(1.32)      | 3.80 (1.32)         |

|                                                                                                                   |                    |                    |
|-------------------------------------------------------------------------------------------------------------------|--------------------|--------------------|
| expenditures home 2017 services for termite pest control                                                          | 8.16<br>(1.43)     | 8.16 (1.43)        |
| expenditures home 2017 home security system service fee                                                           | 11.93<br>(2.10)    | 11.94 (2.10)       |
| expenditures home 2017 termite pest control products                                                              | 2.04<br>(0.36)     | 2.04 (0.36)        |
| expenditures home 2017 moving storage freight                                                                     | 18.56<br>(3.51)    | 18.56 (3.51)       |
| expenditures home 2017 appliance repair including service center                                                  | 6.40<br>(1.05)     | 6.40 (1.05)        |
| expenditures home 2017 reupholstering furniture repair                                                            | 1.96<br>(0.42)     | 1.96 (0.42)        |
| expenditures home 2017 repairs rentals of lawn and garden equipment hand or power tools other household equipment | 2.81<br>(0.54)     | 2.81 (0.54)        |
| expenditures home 2017 computer information services internet                                                     | 163.98<br>(26.25)  | 163.98<br>(26.27)  |
| expenditures home 2017 computer installation                                                                      | 0.08<br>(0.02)     | 0.08 (0.02)        |
| expenditures home 2017 housekeeping supplies                                                                      | 263.15<br>(42.79)  | 263.08<br>(42.80)  |
| expenditures home 2017 laundry and cleaning supplies                                                              | 62.00<br>(10.18)   | 62.01<br>(10.19)   |
| expenditures home 2017 soaps and detergents                                                                       | 33.54<br>(5.55)    | 33.55 (5.56)       |
| expenditures home 2017 other laundry cleaning products                                                            | 28.45<br>(4.63)    | 28.45 (4.64)       |
| expenditures home 2017 cleansing and toilet tissue paper towels and napkins                                       | 47.47<br>(7.77)    | 47.47 (7.77)       |
| expenditures home 2017 miscellaneous household products                                                           | 66.27<br>(11.32)   | 66.24<br>(11.33)   |
| expenditures home 2017 lawn and garden supplies                                                                   | 35.86<br>(7.09)    | 35.83 (7.10)       |
| expenditures home 2017 postage and stationery                                                                     | 52.61<br>(8.90)    | 52.59 (8.91)       |
| expenditures home 2017 stationery stationery supplies giftwrap                                                    | 31.25<br>(5.54)    | 31.23 (5.55)       |
| expenditures home 2017 postage                                                                                    | 19.85<br>(3.44)    | 19.85 (3.44)       |
| expenditures home 2017 delivery services                                                                          | 1.69<br>(0.32)     | 1.69 (0.32)        |
| expenditures home 2017 household furnishings and equipment                                                        | 746.24<br>(124.57) | 746.25<br>(124.69) |
| expenditures home 2017 household textiles                                                                         | 46.34<br>(7.60)    | 46.35 (7.62)       |
| expenditures home 2017 bathroom linens                                                                            | 10.24<br>(1.95)    | 10.25 (1.96)       |
| expenditures home 2017 bedroom linens                                                                             | 25.10<br>(4.29)    | 25.12 (4.30)       |
| expenditures home 2017 curtains and draperies                                                                     | 5.14<br>(0.89)     | 5.14 (0.90)        |

|                                                                           |                   |                   |
|---------------------------------------------------------------------------|-------------------|-------------------|
| expenditures home 2017 slipcovers decorative pillows                      | 1.78<br>(0.29)    | 1.78 (0.29)       |
| expenditures home 2017 furniture                                          | 206.98<br>(36.02) | 207.05<br>(36.09) |
| expenditures home 2017 mattress and springs                               | 40.55<br>(7.00)   | 40.56 (7.01)      |
| expenditures home 2017 other bedroom furniture                            | 35.28<br>(5.81)   | 35.29 (5.83)      |
| expenditures home 2017 sofas                                              | 58.48<br>(10.53)  | 58.51<br>(10.56)  |
| expenditures home 2017 living room chairs                                 | 19.92<br>(3.40)   | 19.92 (3.41)      |
| expenditures home 2017 living room tables                                 | 4.50<br>(0.93)    | 4.50 (0.93)       |
| expenditures home 2017 kitchen dining room furniture                      | 17.73<br>(3.77)   | 17.74 (3.79)      |
| expenditures home 2017 infants furniture                                  | 3.52<br>(0.60)    | 3.52 (0.60)       |
| expenditures home 2017 outdoor furniture                                  | 10.82<br>(2.37)   | 10.82 (2.37)      |
| expenditures home 2017 wall units cabinets and other occasional furniture | 15.92<br>(2.87)   | 15.93 (2.88)      |
| expenditures home 2017 floor coverings                                    | 7.31<br>(1.24)    | 7.31 (1.24)       |
| expenditures home 2017 major appliances                                   | 109.53<br>(17.97) | 109.50<br>(17.98) |
| expenditures home 2017 electric floor cleaning equipment                  | 7.44<br>(1.25)    | 7.44 (1.25)       |
| expenditures home 2017 sewing machines                                    | 2.28<br>(0.60)    | 2.28 (0.60)       |
| expenditures home 2017 small appliances miscellaneous housewares          | 48.78<br>(8.26)   | 48.77 (8.26)      |
| expenditures home 2017 other apparel products and services                | 122.77<br>(35.12) | 122.90<br>(35.30) |
| expenditures home 2017 audio and visual equipment and services            | 422.27<br>(61.99) | 422.12<br>(61.98) |
| expenditures home 2017 televisions                                        | 38.85<br>(6.06)   | 38.85 (6.06)      |
| expenditures home 2017 cable and satellite television services            | 291.45<br>(43.77) | 291.30<br>(43.75) |
| expenditures home 2017 satellite radio service                            | 6.11<br>(1.03)    | 6.11 (1.03)       |
| expenditures home 2017 sound equipment accessories                        | 3.25<br>(0.56)    | 3.24 (0.56)       |
| expenditures home 2017 online gaming services                             | 1.42<br>(0.26)    | 1.42 (0.26)       |
| expenditures home 2017 vcr s and video disc players                       | 1.57<br>(0.23)    | 1.57 (0.23)       |
| expenditures home 2017 video cassettes tapes and discs                    | 9.61<br>(1.44)    | 9.61 (1.44)       |

|                                                                                 |                  |                  |
|---------------------------------------------------------------------------------|------------------|------------------|
| expenditures home 2017 video game software                                      | 4.82<br>(0.73)   | 4.82 (0.73)      |
| expenditures home 2017 video game hardware and accessories                      | 19.76<br>(3.39)  | 19.74 (3.39)     |
| expenditures home 2017 streaming downloading video                              | 9.12<br>(1.47)   | 9.11 (1.47)      |
| expenditures home 2017 applications games ringtones for handheld devices        | 1.29<br>(0.19)   | 1.29 (0.19)      |
| expenditures home 2017 repair of tv radio and sound equipment                   | 0.55<br>(0.09)   | 0.55 (0.09)      |
| expenditures home 2017 rental of televisions                                    | 0.22<br>(0.19)   | 0.22 (0.19)      |
| expenditures home 2017 personal digital audio players                           | 0.81<br>(0.17)   | 0.81 (0.17)      |
| expenditures home 2017 satellite dishes                                         | 0.54<br>(0.22)   | 0.54 (0.22)      |
| expenditures home 2017 c ds records audio tapes                                 | 2.95<br>(0.51)   | 2.95 (0.51)      |
| expenditures home 2017 streaming downloading audio                              | 1.98<br>(0.41)   | 1.98 (0.41)      |
| expenditures home 2017 musical instruments and accessories                      | 9.45<br>(2.01)   | 9.46 (2.03)      |
| expenditures home 2017 rental and repair of musical instruments                 | 0.99<br>(0.25)   | 0.99 (0.25)      |
| expenditures home 2017 rental of video cassettes tapes films and discs          | 9.30<br>(1.39)   | 9.30 (1.39)      |
| expenditures home 2017 live entertainment for catered affairs                   | 4.14<br>(0.98)   | 4.14 (0.98)      |
| expenditures home 2017 rental of party supplies for catered affairs             | 5.40<br>(1.73)   | 5.40 (1.74)      |
| expenditures home 2017 window air conditioners owner                            | 1.49<br>(0.23)   | 1.49 (0.23)      |
| expenditures home 2017 babysitting and child care                               | 52.89<br>(11.24) | 52.89<br>(11.25) |
| expenditures home 2017 boys shirts and sweaters                                 | 10.52<br>(1.66)  | 10.52 (1.66)     |
| expenditures home 2017 boys uniforms and active sportswear                      | 6.48<br>(1.03)   | 6.48 (1.03)      |
| expenditures home 2017 kitchen dining room other linens                         | 4.13<br>(0.78)   | 4.13 (0.78)      |
| expenditures home 2017 dinnerware glassware serving pieces                      | 12.07<br>(2.22)  | 12.06 (2.23)     |
| expenditures home 2017 dishwashers built in garbage disposals range hoods owner | 9.65<br>(1.80)   | 9.64 (1.80)      |
| expenditures home 2017 flooring installation repair replacement owned           | 35.99<br>(6.55)  | 35.98 (6.56)     |
| expenditures home 2017 girls shirts blouses sweaters and vests                  | 12.30<br>(1.99)  | 12.30 (1.99)     |
| expenditures home 2017 lamps lighting fixtures ceiling fans                     | 13.53<br>(2.37)  | 13.53 (2.37)     |

|                                                                                                 |                      |                      |
|-------------------------------------------------------------------------------------------------|----------------------|----------------------|
| expenditures home 2017 maintenance and repair services rented                                   | 15.00<br>(3.28)      | 15.01 (3.28)         |
| expenditures home 2017 microwave ovens owner                                                    | 3.53<br>(0.57)       | 3.53 (0.57)          |
| expenditures home 2017 mens shirts sweaters and vests                                           | 35.11<br>(6.17)      | 35.11 (6.18)         |
| expenditures home 2017 other household appliances owner                                         | 5.97<br>(1.42)       | 5.97 (1.42)          |
| expenditures home 2017 cooking stoves oven owner                                                | 14.86<br>(2.69)      | 14.85 (2.69)         |
| expenditures home 2017 refrigerators freezers owner                                             | 31.17<br>(5.73)      | 31.15 (5.74)         |
| expenditures home 2017 stereos radios speakers and sound components including those in vehicles | 6.17<br>(1.65)       | 6.17 (1.65)          |
| expenditures home 2017 residential phone service voip and phone cards                           | 126.56<br>(20.56)    | 126.53<br>(20.56)    |
| expenditures home 2017 clothes washer or dryer owner                                            | 25.62<br>(4.31)      | 25.61 (4.31)         |
| expenditures home 2017 womens sweaters shirts tops vests                                        | 68.70<br>(11.34)     | 68.69<br>(11.35)     |
| expenditures home 2017 housing                                                                  | 7469.68<br>(1192.44) | 7469.56<br>(1193.48) |
| expenditures home 2017 mortgage interest                                                        | 1241.22<br>(241.28)  | 1241.17<br>(241.50)  |
| expenditures home 2017 interest paid home equity loan                                           | 15.52<br>(3.03)      | 15.51 (3.03)         |
| expenditures home 2017 womens sleepwear                                                         | 9.07<br>(1.42)       | 9.07 (1.43)          |
| expenditures home 2017 womens undergarments                                                     | 14.38<br>(2.35)      | 14.38 (2.36)         |
| expenditures home 2017 womens hosiery                                                           | 9.01<br>(1.41)       | 9.01 (1.41)          |
| expenditures home 2017 womens suits                                                             | 2.31<br>(0.36)       | 2.31 (0.36)          |
| expenditures home 2017 womens accessories                                                       | 36.86<br>(9.36)      | 36.88 (9.40)         |
| expenditures home 2017 womens uniforms                                                          | 2.24<br>(0.34)       | 2.24 (0.34)          |
| expenditures home 2017 womens costumes                                                          | 0.63<br>(0.15)       | 0.63 (0.15)          |
| expenditures home 2017 girls 2 to 15                                                            | 45.88<br>(6.92)      | 45.87 (6.92)         |
| expenditures home 2017 girls coats and jackets                                                  | 2.23<br>(0.34)       | 2.23 (0.33)          |
| expenditures home 2017 girls dresses and suits                                                  | 6.13<br>(1.21)       | 6.13 (1.21)          |
| expenditures home 2017 girls skirts pants and shorts                                            | 10.09<br>(1.52)      | 10.09 (1.52)         |
| expenditures home 2017 girls active sportswear                                                  | 5.34<br>(0.97)       | 5.34 (0.98)          |

|                                                                                |                   |                   |
|--------------------------------------------------------------------------------|-------------------|-------------------|
| expenditures home 2017 girls underwear and sleepwear                           | 3.94<br>(0.59)    | 3.93 (0.59)       |
| expenditures home 2017 girls hosiery                                           | 1.77<br>(0.29)    | 1.77 (0.29)       |
| expenditures home 2017 girls accessories                                       | 2.06<br>(0.42)    | 2.06 (0.42)       |
| expenditures home 2017 girls uniforms                                          | 1.03<br>(0.19)    | 1.03 (0.19)       |
| expenditures home 2017 girls costumes                                          | 1.11<br>(0.21)    | 1.11 (0.21)       |
| expenditures home 2017 children under 2                                        | 36.35<br>(5.75)   | 36.35 (5.76)      |
| expenditures home 2017 infant coat jacket snowsuit                             | 0.44<br>(0.07)    | 0.44 (0.07)       |
| expenditures home 2017 infant dresses outerwear                                | 10.86<br>(2.22)   | 10.86 (2.22)      |
| expenditures home 2017 infant underwear                                        | 15.93<br>(2.34)   | 15.92 (2.34)      |
| expenditures home 2017 infant nightwear loungewear                             | 2.75<br>(0.42)    | 2.74 (0.42)       |
| expenditures home 2017 infant accessories                                      | 6.68<br>(1.61)    | 6.68 (1.62)       |
| expenditures home 2017 footwear                                                | 148.52<br>(22.91) | 148.51<br>(22.93) |
| expenditures home 2017 mens footwear                                           | 47.40<br>(7.13)   | 47.39 (7.13)      |
| expenditures home 2017 boys footwear                                           | 21.30<br>(3.89)   | 21.30 (3.89)      |
| expenditures home 2017 womens footwear                                         | 65.27<br>(11.77)  | 65.28<br>(11.80)  |
| expenditures home 2017 girls footwear                                          | 16.46<br>(2.70)   | 16.46 (2.70)      |
| expenditures miscellaneous 2017 automobile service clubs and gps services      | 10.51<br>(1.36)   | 10.51 (1.36)      |
| expenditures miscellaneous 2017 cash downpayment car truck lease               | 9.68<br>(1.34)    | 9.69 (1.35)       |
| expenditures miscellaneous 2017 car truck lease payments                       | 106.92<br>(19.08) | 106.96<br>(19.13) |
| expenditures miscellaneous 2017 auto truck rental                              | 17.80<br>(3.21)   | 17.81 (3.22)      |
| expenditures miscellaneous 2017 auto truck rental out of town trips            | 9.36<br>(2.03)    | 9.37 (2.03)       |
| expenditures miscellaneous 2017 termination fee for car truck lease            | 0.17<br>(0.03)    | 0.17 (0.03)       |
| expenditures miscellaneous 2017 trade in allowance for car truck lease         | 15.66<br>(1.99)   | 15.66 (1.99)      |
| expenditures miscellaneous 2017 finance late interest charges for credit cards | 111.50<br>(12.32) | 111.49<br>(12.33) |
| expenditures miscellaneous 2017 finance late interest charges for other loans  | 16.94<br>(2.48)   | 16.93 (2.48)      |

|                                                                                            |                       |                       |
|--------------------------------------------------------------------------------------------|-----------------------|-----------------------|
| expenditures miscellaneous 2017 finance late interest charges for student loans            | 61.22<br>(8.74)       | 61.24 (8.76)          |
| expenditures miscellaneous 2017 gas tank repair replacement                                | 5.08<br>(1.22)        | 5.08 (1.22)           |
| expenditures miscellaneous 2017 fee for service health plan bcbs                           | 219.65<br>(35.52)     | 219.57<br>(35.56)     |
| expenditures miscellaneous 2017 fee for service health plan not bcbs                       | 236.94<br>(36.95)     | 236.91<br>(37.00)     |
| expenditures miscellaneous 2017 health maintenance organization bcbs                       | 166.80<br>(20.40)     | 166.78<br>(20.40)     |
| expenditures miscellaneous 2017 health maintenance organization not bcbs                   | 251.51<br>(31.16)     | 251.46<br>(31.16)     |
| expenditures miscellaneous 2017 magazines                                                  | 0.01<br>(0.00)        | 0.01 (0.00)           |
| expenditures miscellaneous 2017 material and supplies for sewing needlework quilting       | 8.89<br>(1.71)        | 8.88 (1.71)           |
| expenditures miscellaneous 2017 movies parks museums                                       | 25.69<br>(4.37)       | 25.70 (4.38)          |
| expenditures miscellaneous 2017 newspapers                                                 | 0.02<br>(0.00)        | 0.02 (0.00)           |
| expenditures miscellaneous 2017 play theater opera concert                                 | 19.79<br>(5.32)       | 19.79 (5.33)          |
| expenditures miscellaneous 2017 value of savings checking money market and c ds            | 5239.25<br>(1047.28)  | 5237.92<br>(1049.11)  |
| expenditures miscellaneous 2017 value surrender of whole life insurance policy             | 3322.14<br>(1031.53)  | 3324.11<br>(1034.28)  |
| expenditures miscellaneous 2017 value of other financial assets                            | 1862.47<br>(573.75)   | 1862.73<br>(575.27)   |
| expenditures miscellaneous 2017 value of retirement plan                                   | 29820.78<br>(6626.41) | 29818.33<br>(6640.26) |
| expenditures miscellaneous 2017 value of stocks bonds mutual funds                         | 6357.62<br>(1930.08)  | 6359.04<br>(1935.39)  |
| expenditures miscellaneous 2017 vehicle or engine repairs                                  | 76.69<br>(10.36)      | 76.67<br>(10.36)      |
| expenditures miscellaneous 2017 care for elderly invalids handicapped etc                  | 12.03<br>(2.75)       | 12.01 (2.76)          |
| expenditures miscellaneous 2017 day care centers nursery and preschools                    | 146.05<br>(22.90)     | 146.09<br>(23.01)     |
| expenditures miscellaneous 2017 watches                                                    | 28.04<br>(11.60)      | 28.07<br>(11.63)      |
| expenditures miscellaneous 2017 jewelry                                                    | 32.47<br>(8.95)       | 32.49 (8.98)          |
| expenditures miscellaneous 2017 shoe repair and other shoe service                         | 0.68<br>(0.14)        | 0.68 (0.14)           |
| expenditures miscellaneous 2017 coin operated apparel laundry and dry cleaning             | 14.32<br>(2.66)       | 14.33 (2.68)          |
| expenditures miscellaneous 2017 alteration repair and tailoring of apparel and accessories | 2.66<br>(0.51)        | 2.66 (0.52)           |
| expenditures miscellaneous 2017 clothing rental                                            | 0.86<br>(0.19)        | 0.86 (0.19)           |



|                                                                                            |                     |                     |
|--------------------------------------------------------------------------------------------|---------------------|---------------------|
| expenditures miscellaneous 2017 watch and jewelry repair                                   | 12.36<br>(6.41)     | 12.37 (6.43)        |
| expenditures miscellaneous 2017 apparel laundry and dry cleaning not coin operated         | 18.66<br>(5.30)     | 18.68 (5.31)        |
| expenditures miscellaneous 2017 transportation                                             | 3879.86<br>(497.37) | 3879.45<br>(497.60) |
| expenditures miscellaneous 2017 vehicle purchases net outlay                               | 1647.71<br>(215.91) | 1647.47<br>(215.99) |
| expenditures miscellaneous 2017 cars and trucks new                                        | 821.21<br>(131.57)  | 821.11<br>(131.73)  |
| expenditures miscellaneous 2017 new cars                                                   | 304.88<br>(40.61)   | 304.91<br>(40.64)   |
| expenditures miscellaneous 2017 new trucks                                                 | 518.09<br>(92.85)   | 517.96<br>(92.99)   |
| expenditures miscellaneous 2017 cars and trucks used                                       | 802.29<br>(82.13)   | 802.16<br>(82.14)   |
| expenditures miscellaneous 2017 used cars                                                  | 347.68<br>(36.06)   | 347.72<br>(36.09)   |
| expenditures miscellaneous 2017 used trucks                                                | 453.01<br>(53.13)   | 452.84<br>(53.16)   |
| expenditures miscellaneous 2017 new motorcycles                                            | 12.80<br>(2.68)     | 12.80 (2.69)        |
| expenditures miscellaneous 2017 used motorcycles                                           | 10.87<br>(1.60)     | 10.87 (1.60)        |
| expenditures miscellaneous 2017 gasoline and motor oil                                     | 842.98<br>(94.83)   | 842.77<br>(94.82)   |
| expenditures miscellaneous 2017 vehicle finance charges                                    | 87.53<br>(10.03)    | 87.52<br>(10.03)    |
| expenditures miscellaneous 2017 maintenance and repairs                                    | 338.99<br>(42.87)   | 338.91<br>(42.88)   |
| expenditures miscellaneous 2017 coolant brake fluid transmission fluid and other additives | 2.88<br>(0.28)      | 2.88 (0.28)         |
| expenditures miscellaneous 2017 tires purchased replaced installed                         | 52.15<br>(7.15)     | 52.14 (7.15)        |
| expenditures miscellaneous 2017 parts equipment and accessories                            | 20.20<br>(2.97)     | 20.18 (2.97)        |
| expenditures miscellaneous 2017 vehicle products and cleaning services                     | 5.60<br>(0.83)      | 5.59 (0.83)         |
| expenditures miscellaneous 2017 misc auto repair servicing                                 | 40.20<br>(5.26)     | 40.20 (5.26)        |
| expenditures miscellaneous 2017 body work and painting                                     | 12.71<br>(1.94)     | 12.71 (1.94)        |
| expenditures miscellaneous 2017 motor tune up                                              | 16.71<br>(2.30)     | 16.71 (2.30)        |
| expenditures miscellaneous 2017 lube oil change and oil filters                            | 35.25<br>(3.91)     | 35.24 (3.91)        |
| expenditures miscellaneous 2017 front end alignment wheel balance and rotation             | 10.29<br>(1.21)     | 10.29 (1.21)        |
| expenditures miscellaneous 2017 shock absorber replacement                                 | 5.10<br>(0.65)      | 5.10 (0.65)         |

|                                                                                  |                   |                   |
|----------------------------------------------------------------------------------|-------------------|-------------------|
| expenditures miscellaneous 2017 repair tires and other repair work               | 42.75<br>(4.93)   | 42.76 (4.93)      |
| expenditures miscellaneous 2017 auto repair service policy                       | 13.86<br>(1.77)   | 13.85 (1.77)      |
| expenditures miscellaneous 2017 vehicle insurance                                | 433.09<br>(46.97) | 433.00<br>(46.93) |
| expenditures miscellaneous 2017 vehicle rental leases licenses and other charges | 260.72<br>(42.06) | 260.77<br>(42.15) |
| expenditures miscellaneous 2017 rented vehicles                                  | 27.60<br>(5.30)   | 27.61 (5.31)      |
| expenditures miscellaneous 2017 leased vehicles                                  | 132.79<br>(21.15) | 132.82<br>(21.19) |
| expenditures miscellaneous 2017 vehicle registration state                       | 38.42<br>(5.44)   | 38.40 (5.44)      |
| expenditures miscellaneous 2017 vehicle registration local                       | 3.89<br>(0.82)    | 3.89 (0.82)       |
| expenditures miscellaneous 2017 drivers license                                  | 3.52<br>(0.35)    | 3.52 (0.35)       |
| expenditures miscellaneous 2017 vehicle inspection                               | 5.05<br>(0.64)    | 5.05 (0.64)       |
| expenditures miscellaneous 2017 parking fees                                     | 20.10<br>(5.05)   | 20.12 (5.07)      |
| expenditures miscellaneous 2017 parking fees in home city excluding residence    | 17.14<br>(4.37)   | 17.16 (4.39)      |
| expenditures miscellaneous 2017 parking fees out of town trips                   | 2.94<br>(0.61)    | 2.94 (0.61)       |
| expenditures miscellaneous 2017 tolls or electronic toll passes                  | 15.75<br>(3.01)   | 15.76 (3.01)      |
| expenditures miscellaneous 2017 tolls on out of town trips                       | 2.21<br>(0.38)    | 2.21 (0.38)       |
| expenditures miscellaneous 2017 towing charges                                   | 1.64<br>(0.19)    | 1.64 (0.19)       |
| expenditures miscellaneous 2017 public and other transportation                  | 284.81<br>(75.13) | 285.04<br>(75.46) |
| expenditures miscellaneous 2017 airline fares                                    | 181.47<br>(51.18) | 181.62<br>(51.41) |
| expenditures miscellaneous 2017 intercity bus fares                              | 4.60<br>(0.64)    | 4.60 (0.64)       |
| expenditures miscellaneous 2017 intracity mass transit fares                     | 35.12<br>(6.64)   | 35.16 (6.68)      |
| expenditures miscellaneous 2017 local trans on out of town trips                 | 5.61<br>(1.60)    | 5.61 (1.61)       |
| expenditures miscellaneous 2017 taxi fares and limousine services on trips       | 3.29<br>(0.94)    | 3.29 (0.94)       |
| expenditures miscellaneous 2017 taxi fares and limousine services                | 13.74<br>(2.93)   | 13.75 (2.94)      |
| expenditures miscellaneous 2017 intercity train fares                            | 7.20<br>(1.59)    | 7.20 (1.59)       |
| expenditures miscellaneous 2017 ship fares                                       | 30.48<br>(7.94)   | 30.48 (7.96)      |

|                                                                                            |                     |                     |
|--------------------------------------------------------------------------------------------|---------------------|---------------------|
| expenditures miscellaneous 2017 school bus                                                 | 2.83<br>(1.48)      | 2.84 (1.49)         |
| expenditures miscellaneous 2017 healthcare                                                 | 1763.55<br>(260.51) | 1762.66<br>(260.57) |
| expenditures miscellaneous 2017 health insurance                                           | 1203.61<br>(169.20) | 1203.08<br>(169.20) |
| expenditures miscellaneous 2017 commercial health insurance                                | 236.94<br>(36.95)   | 236.91<br>(37.00)   |
| expenditures miscellaneous 2017 blue cross blue shield                                     | 412.38<br>(58.59)   | 412.25<br>(58.62)   |
| expenditures miscellaneous 2017 commercial medicare supplement bcbs                        | 15.29<br>(4.27)     | 15.26 (4.27)        |
| expenditures miscellaneous 2017 other health insurance bcbs                                | 12.17<br>(1.78)     | 12.17 (1.78)        |
| expenditures miscellaneous 2017 medicare payments                                          | 175.41<br>(38.83)   | 175.23<br>(38.81)   |
| expenditures miscellaneous 2017 medicare prescription drug premium                         | 38.35<br>(9.03)     | 38.30 (9.02)        |
| expenditures miscellaneous 2017 commercial medicare supplements and other health insurance | 77.44<br>(17.03)    | 77.35<br>(17.04)    |
| expenditures miscellaneous 2017 commercial medicare supplement not blue cross              | 42.19<br>(11.68)    | 42.13<br>(11.68)    |
| expenditures miscellaneous 2017 other health insurance not bcbs                            | 35.59<br>(6.01)     | 35.57 (6.01)        |
| expenditures miscellaneous 2017 long term care insurance                                   | 33.40<br>(6.06)     | 33.38 (6.06)        |
| expenditures miscellaneous 2017 medical services                                           | 329.47<br>(56.13)   | 329.28<br>(56.19)   |
| expenditures miscellaneous 2017 physician s services                                       | 72.73<br>(11.57)    | 72.69<br>(11.59)    |
| expenditures miscellaneous 2017 dental services                                            | 119.03<br>(20.21)   | 118.96<br>(20.23)   |
| expenditures miscellaneous 2017 eyecare services                                           | 18.59<br>(2.77)     | 18.58 (2.78)        |
| expenditures miscellaneous 2017 service by professionals other than physician              | 24.96<br>(4.47)     | 24.95 (4.48)        |
| expenditures miscellaneous 2017 lab tests x rays                                           | 19.47<br>(3.44)     | 19.47 (3.45)        |
| expenditures miscellaneous 2017 hospital room and services                                 | 55.63<br>(10.15)    | 55.59<br>(10.17)    |
| expenditures miscellaneous 2017 care in convalescent or nursing home                       | 9.39<br>(2.87)      | 9.37 (2.88)         |
| expenditures miscellaneous 2017 other medical care services                                | 10.51<br>(2.29)     | 10.51 (2.30)        |
| expenditures miscellaneous 2017 drugs                                                      | 171.61<br>(28.15)   | 171.49<br>(28.16)   |
| expenditures miscellaneous 2017 nonprescription drugs                                      | 40.71<br>(6.31)     | 40.68 (6.31)        |
| expenditures miscellaneous 2017 nonprescription vitamins                                   | 23.61<br>(3.79)     | 23.59 (3.79)        |

|                                                                                     |                     |                     |
|-------------------------------------------------------------------------------------|---------------------|---------------------|
| expenditures miscellaneous 2017 prescription drugs                                  | 107.32<br>(18.34)   | 107.23<br>(18.34)   |
| expenditures miscellaneous 2017 medical supplies                                    | 59.92<br>(9.21)     | 59.88 (9.21)        |
| expenditures miscellaneous 2017 eyeglasses and contact lenses                       | 29.78<br>(4.14)     | 29.77 (4.14)        |
| expenditures miscellaneous 2017 hearing aids                                        | 9.27<br>(2.60)      | 9.25 (2.61)         |
| expenditures miscellaneous 2017 topicals and dressings                              | 16.69<br>(2.58)     | 16.68 (2.58)        |
| expenditures miscellaneous 2017 adult diapers                                       | 1.08<br>(0.13)      | 1.08 (0.13)         |
| expenditures miscellaneous 2017 medical equipment for general use                   | 1.78<br>(0.39)      | 1.78 (0.39)         |
| expenditures miscellaneous 2017 supportive and convalescent medical equipment       | 1.27<br>(0.25)      | 1.27 (0.25)         |
| expenditures miscellaneous 2017 rental of medical equipment                         | 0.23<br>(0.05)      | 0.23 (0.05)         |
| expenditures miscellaneous 2017 rental of supportive convalescent medical equipment | 0.22<br>(0.04)      | 0.22 (0.04)         |
| expenditures miscellaneous 2017 entertainment                                       | 1169.88<br>(187.83) | 1169.63<br>(188.07) |
| expenditures miscellaneous 2017 fees and admissions                                 | 288.89<br>(67.95)   | 288.95<br>(68.16)   |
| expenditures miscellaneous 2017 recreation expenses out of town trips               | 9.22<br>(2.17)      | 9.23 (2.18)         |
| expenditures miscellaneous 2017 social recreation health club membership            | 71.95<br>(18.10)    | 71.96<br>(18.14)    |
| expenditures miscellaneous 2017 fees for participant sports                         | 41.65<br>(8.17)     | 41.62 (8.19)        |
| expenditures miscellaneous 2017 participant sports out of town trips                | 8.72<br>(2.50)      | 8.72 (2.51)         |
| expenditures miscellaneous 2017 movie other admissions out of town trips            | 25.02<br>(6.36)     | 25.03 (6.39)        |
| expenditures miscellaneous 2017 admission to sporting events                        | 19.25<br>(5.65)     | 19.25 (5.66)        |
| expenditures miscellaneous 2017 admission to sports events out of town trips        | 8.33<br>(2.12)      | 8.34 (2.13)         |
| expenditures miscellaneous 2017 fees for recreational lessons                       | 51.39<br>(13.82)    | 51.43<br>(13.90)    |
| expenditures miscellaneous 2017 other entertainment services out of town trips      | 9.22<br>(2.17)      | 9.23 (2.18)         |
| expenditures miscellaneous 2017 pets toys hobbies and playground equipment          | 270.30<br>(47.33)   | 270.14<br>(47.40)   |
| expenditures miscellaneous 2017 pets                                                | 217.17<br>(38.39)   | 217.03<br>(38.44)   |
| expenditures miscellaneous 2017 pet food                                            | 95.51<br>(17.15)    | 95.43<br>(17.17)    |
| expenditures miscellaneous 2017 pet purchase supplies medicine                      | 47.63<br>(8.38)     | 47.60 (8.39)        |

|                                                                                     |                   |                   |
|-------------------------------------------------------------------------------------|-------------------|-------------------|
| expenditures miscellaneous 2017 pet services                                        | 20.69<br>(4.59)   | 20.69 (4.60)      |
| expenditures miscellaneous 2017 vet services                                        | 53.95<br>(9.60)   | 53.92 (9.62)      |
| expenditures miscellaneous 2017 toys games arts and crafts and tricycles            | 51.92<br>(8.54)   | 51.90 (8.55)      |
| expenditures miscellaneous 2017 stamp and coin collecting                           | 1.61<br>(0.39)    | 1.61 (0.39)       |
| expenditures miscellaneous 2017 playground equipment                                | 1.63<br>(0.26)    | 1.63 (0.26)       |
| expenditures miscellaneous 2017 other entertainment supplies equipment and services | 193.31<br>(39.80) | 193.25<br>(39.87) |
| expenditures miscellaneous 2017 unmotored recreational vehicles                     | 33.57<br>(7.95)   | 33.53 (7.96)      |
| expenditures miscellaneous 2017 boat without motor and boat trailers                | 4.35<br>(1.29)    | 4.35 (1.30)       |
| expenditures miscellaneous 2017 trailer and other attachable campers                | 29.42<br>(7.46)   | 29.38 (7.47)      |
| expenditures miscellaneous 2017 motorized recreational vehicles                     | 61.36<br>(15.11)  | 61.32<br>(15.15)  |
| expenditures miscellaneous 2017 purchase of motorized camper                        | 24.40<br>(6.32)   | 24.38 (6.33)      |
| expenditures miscellaneous 2017 purchase of other vehicle                           | 21.56<br>(5.69)   | 21.55 (5.71)      |
| expenditures miscellaneous 2017 purchase of boat with motor                         | 16.02<br>(3.74)   | 16.01 (3.74)      |
| expenditures miscellaneous 2017 sports recreation and exercise equipment            | 56.24<br>(11.33)  | 56.25<br>(11.36)  |
| expenditures miscellaneous 2017 athletic gear game tables and exercise equipment    | 18.81<br>(3.65)   | 18.81 (3.66)      |
| expenditures miscellaneous 2017 bicycles                                            | 9.95<br>(1.86)    | 9.95 (1.86)       |
| expenditures miscellaneous 2017 camping equipment                                   | 4.91<br>(0.86)    | 4.91 (0.87)       |
| expenditures miscellaneous 2017 hunting and fishing equipment                       | 13.90<br>(3.22)   | 13.89 (3.23)      |
| expenditures miscellaneous 2017 winter sports equipment                             | 2.24<br>(0.50)    | 2.24 (0.50)       |
| expenditures miscellaneous 2017 water sports equipment                              | 1.84<br>(0.49)    | 1.84 (0.49)       |
| expenditures miscellaneous 2017 other sports equipment                              | 3.30<br>(0.60)    | 3.30 (0.60)       |
| expenditures miscellaneous 2017 global positioning system devices                   | 0.43<br>(0.34)    | 0.43 (0.34)       |
| expenditures miscellaneous 2017 rental and repair of miscellaneous sports equipment | 0.67<br>(0.15)    | 0.67 (0.15)       |
| expenditures miscellaneous 2017 photographic equipment supplies and services        | 18.40<br>(2.63)   | 18.40 (2.64)      |
| expenditures miscellaneous 2017 film                                                | 0.44<br>(0.10)    | 0.44 (0.10)       |

|                                                                                            |                   |                   |
|--------------------------------------------------------------------------------------------|-------------------|-------------------|
| expenditures miscellaneous 2017 other photographic supplies                                | 0.24<br>(0.08)    | 0.24 (0.08)       |
| expenditures miscellaneous 2017 photo processing                                           | 2.98<br>(0.58)    | 2.98 (0.58)       |
| expenditures miscellaneous 2017 photographic equipment                                     | 7.32<br>(1.33)    | 7.32 (1.35)       |
| expenditures miscellaneous 2017 photographer fees                                          | 7.22<br>(1.00)    | 7.21 (1.00)       |
| expenditures miscellaneous 2017 fireworks                                                  | 2.62<br>(0.74)    | 2.62 (0.74)       |
| expenditures miscellaneous 2017 visual goods                                               | 0.35<br>(0.08)    | 0.35 (0.08)       |
| expenditures miscellaneous 2017 pinball electronic video games                             | 0.81<br>(0.15)    | 0.81 (0.15)       |
| expenditures miscellaneous 2017 personal care products and services                        | 276.74<br>(35.56) | 276.73<br>(35.58) |
| expenditures miscellaneous 2017 personal care products                                     | 153.12<br>(19.82) | 153.10<br>(19.83) |
| expenditures miscellaneous 2017 hair care products                                         | 30.02<br>(3.75)   | 30.01 (3.75)      |
| expenditures miscellaneous 2017 nonelectric articles for the hair                          | 5.68<br>(0.80)    | 5.67 (0.80)       |
| expenditures miscellaneous 2017 wigs and hairpieces                                        | 0.89<br>(0.67)    | 0.89 (0.68)       |
| expenditures miscellaneous 2017 oral hygiene products articles                             | 17.85<br>(2.23)   | 17.84 (2.23)      |
| expenditures miscellaneous 2017 shaving needs                                              | 9.03<br>(1.41)    | 9.03 (1.41)       |
| expenditures miscellaneous 2017 cosmetics perfume bath preparations                        | 68.21<br>(9.03)   | 68.20 (9.04)      |
| expenditures miscellaneous 2017 deodorants feminine hygiene<br>miscellaneous personal care | 17.39<br>(2.32)   | 17.39 (2.32)      |
| expenditures miscellaneous 2017 electric personal care appliances                          | 4.18<br>(0.65)    | 4.18 (0.66)       |
| expenditures miscellaneous 2017 personal care services                                     | 123.61<br>(16.35) | 123.63<br>(16.36) |
| expenditures miscellaneous 2017 reading                                                    | 46.06<br>(7.63)   | 46.04 (7.64)      |
| expenditures miscellaneous 2017 books thru book clubs                                      | 1.43<br>(0.31)    | 1.43 (0.31)       |
| expenditures miscellaneous 2017 books not thru book clubs                                  | 11.18<br>(2.60)   | 11.18 (2.60)      |
| expenditures miscellaneous 2017 digital book readers                                       | 9.87<br>(1.68)    | 9.87 (1.69)       |
| expenditures miscellaneous 2017 school supplies etc unspecified                            | 24.19<br>(3.25)   | 24.19 (3.26)      |
| expenditures miscellaneous 2017 tobacco products and smoking supplies                      | 133.26<br>(16.38) | 133.18<br>(16.40) |
| expenditures miscellaneous 2017 other tobacco products                                     | 13.37<br>(2.02)   | 13.36 (2.02)      |

|                                                                                         |                    |                    |
|-----------------------------------------------------------------------------------------|--------------------|--------------------|
| expenditures miscellaneous 2017 smoking accessories                                     | 3.20<br>(0.47)     | 3.20 (0.47)        |
| expenditures miscellaneous 2017 miscellaneous                                           | 355.64<br>(53.13)  | 355.57<br>(53.19)  |
| expenditures miscellaneous 2017 lotteries and pari mutuel losses                        | 21.08<br>(3.66)    | 21.06 (3.66)       |
| expenditures miscellaneous 2017 legal fees                                              | 63.67<br>(13.11)   | 63.66<br>(13.14)   |
| expenditures miscellaneous 2017 funeral expenses                                        | 26.83<br>(5.08)    | 26.80 (5.08)       |
| expenditures miscellaneous 2017 safe deposit box rental                                 | 1.64<br>(0.30)     | 1.64 (0.30)        |
| expenditures miscellaneous 2017 checking accounts other bank service charges            | 11.78<br>(1.16)    | 11.77 (1.16)       |
| expenditures miscellaneous 2017 cemetery lots vaults maintenance fees                   | 2.31<br>(0.47)     | 2.30 (0.47)        |
| expenditures miscellaneous 2017 accounting fees                                         | 26.64<br>(6.28)    | 26.64 (6.29)       |
| expenditures miscellaneous 2017 miscellaneous personal services                         | 16.52<br>(2.53)    | 16.51 (2.53)       |
| expenditures miscellaneous 2017 dating services                                         | 0.24<br>(0.04)     | 0.24 (0.04)        |
| expenditures miscellaneous 2017 occupational expenses                                   | 18.76<br>(2.91)    | 18.76 (2.91)       |
| expenditures miscellaneous 2017 expenses for other properties                           | 17.22<br>(3.38)    | 17.21 (3.39)       |
| expenditures miscellaneous 2017 credit card memberships                                 | 2.09<br>(0.61)     | 2.09 (0.61)        |
| expenditures miscellaneous 2017 shopping club membership fees                           | 7.37<br>(1.12)     | 7.37 (1.12)        |
| expenditures miscellaneous 2017 vacation clubs                                          | 12.16<br>(6.14)    | 12.18 (6.16)       |
| expenditures miscellaneous 2017 cash contributions                                      | 742.11<br>(126.87) | 742.13<br>(127.03) |
| expenditures miscellaneous 2017 support for college students                            | 42.38<br>(8.22)    | 42.40 (8.25)       |
| expenditures miscellaneous 2017 alimony expenditures                                    | 29.89<br>(6.08)    | 29.89 (6.09)       |
| expenditures miscellaneous 2017 child support expenditures                              | 85.25<br>(9.87)    | 85.24 (9.90)       |
| expenditures miscellaneous 2017 gift to non cu members of stocks bonds and mutual funds | 25.19<br>(4.06)    | 25.19 (4.06)       |
| expenditures miscellaneous 2017 cash contributions to charities and other organizations | 92.80<br>(25.62)   | 92.82<br>(25.69)   |
| expenditures miscellaneous 2017 cash contributions to church religious organizations    | 317.82<br>(45.37)  | 317.79<br>(45.39)  |
| expenditures miscellaneous 2017 cash contribution to educational institutions           | 16.14<br>(6.26)    | 16.15 (6.28)       |
| expenditures miscellaneous 2017 cash contribution to political organizations            | 3.24<br>(0.67)     | 3.23 (0.68)        |

|                                                                   |                     |                     |
|-------------------------------------------------------------------|---------------------|---------------------|
| expenditures miscellaneous 2017 other cash gifts                  | 130.24<br>(19.61)   | 130.20<br>(19.61)   |
| expenditures miscellaneous 2017 personal insurance and pensions   | 2768.03<br>(594.74) | 2769.16<br>(596.42) |
| expenditures miscellaneous 2017 life and other personal insurance | 141.35<br>(24.85)   | 141.37<br>(24.89)   |

HH=Household

Fam=Family

Pop=Population

Non Fam=Non family

OT=Other

ER=Emergency room

RV=recreational vehicle

Equip=equipment

Misc.=miscellaneous

BCBS=Blue Cross Blue Shield

OOT=Out of town

RIHC=resource intensive healthcare
