# Supplementary material for: Can diverse population characteristics be leveraged in a machine learning pipeline to predict resource intensive healthcare utilization among hospital service areas?
Source: Springer Nature journal article supplement (doi:10.1186/s12913-022-08154-4), 2022-06-30
Supplement: MOESM9 [file 23224174]

## Additional File 9. Descriptive Statistics for Consumer Expenditures Candidate Predictors (second order terms)

- Additional File 9
  - File format: PDF
  - File title: Descriptive Statistics for Consumer Expenditures Candidate Predictors (second order terms)
  - File description: Long table with univariate results for second order terms

| ER Visits (mean(SD))                                                                                                                    |                    |
|-----------------------------------------------------------------------------------------------------------------------------------------|--------------------|
| expenditures food 2017 dinner at employer and school cafeterias total amount                                                            | 2.09               |
| expenditures miscellaneous 2017 wigs and hairpieces total amount                                                                        | (1.31)             |
| expenditures food 2017 education total amount expenditures miscellaneous 2017 wigs and hairpieces total amount                          | 510.65<br>(297.03) |
| expenditures food 2017 test preparation tutoring services total amount expenditures miscellaneous 2017 wigs and hairpieces total amount | 6.52<br>(4.02)     |
| expenditures food 2017 other schools tuition total amount expenditures miscellaneous 2017 wigs and hairpieces total amount              | 3.16<br>(1.82)     |
| expenditures food 2017 school lunches total amount expenditures miscellaneous 2017 wigs and hairpieces total amount                     | 22.36<br>(13.73)   |
| expenditures food 2017 alcoholic beverages away from home total amount expenditures miscellaneous 2017 wigs and hairpieces total amount | 80.15<br>(43.68)   |
| expenditures food 2017 wine away total amount expenditures miscellaneous 2017 wigs and hairpieces total amount                          | 15.68<br>(8.68)    |
| expenditures food 2017 candy and chewing gum total amount expenditures miscellaneous 2017 wigs and hairpieces total amount              | 36.04<br>(20.43)   |
| expenditures food 2017 rice total amount expenditures miscellaneous 2017 wigs and hairpieces total amount                               | 9.49<br>(6.14)     |
| expenditures food 2017 pies tarts turnovers total amount expenditures miscellaneous 2017 wigs and hairpieces total amount               | 5.39<br>(3.14)     |
| expenditures food 2017 beef total amount expenditures miscellaneous 2017 wigs and hairpieces total amount                               | 84.81<br>(50.45)   |
| expenditures food 2017 margarine total amount expenditures miscellaneous 2017 wigs and hairpieces total amount                          | 2.11<br>(1.31)     |
| expenditures food 2017 peanut butter total amount expenditures miscellaneous 2017 wigs and hairpieces total amount                      | 7.38<br>(4.45)     |
| expenditures food 2017 baby food total amount expenditures miscellaneous 2017 wigs and hairpieces total amount                          | 11.62<br>(7.02)    |
| expenditures home 2017 telephones and accessories total amount expenditures miscellaneous 2017 wigs and hairpieces total amount         | 19.14<br>(13.62)   |
| expenditures home 2017 rental of furniture total amount expenditures miscellaneous 2017 wigs and hairpieces total amount                | 1.91<br>(1.89)     |
| expenditures home 2017 mens nightwear total amount expenditures miscellaneous 2017 wigs and hairpieces total amount                     | 0.71<br>(0.42)     |
| expenditures home 2017 boys suits sportcoats vests total amount expenditures miscellaneous 2017 wigs and hairpieces total amount        | 0.42<br>(0.26)     |

|                                                                                                                                                                   |                      |
|-------------------------------------------------------------------------------------------------------------------------------------------------------------------|----------------------|
| expenditures home 2017 rent total amount expenditures miscellaneous 2017 wigs and hairpieces total amount                                                         | 1216.59<br>(1317.84) |
| expenditures home 2017 maintenance insurance and other expenses rented total amount expenditures miscellaneous 2017 wigs and hairpieces total amount              | 36.79<br>(25.36)     |
| expenditures home 2017 tenants insurance total amount expenditures miscellaneous 2017 wigs and hairpieces total amount                                            | 7.25<br>(7.49)       |
| expenditures home 2017 electricity total amount expenditures miscellaneous 2017 wigs and hairpieces total amount                                                  | 497.92<br>(371.43)   |
| expenditures home 2017 fuel oil total amount expenditures miscellaneous 2017 wigs and hairpieces total amount                                                     | 21.26<br>(12.98)     |
| expenditures home 2017 housekeeping services total amount expenditures miscellaneous 2017 wigs and hairpieces total amount                                        | 55.11<br>(29.69)     |
| expenditures home 2017 coin operated household laundry and dry cleaning nonclothing total amount expenditures miscellaneous 2017 wigs and hairpieces total amount | 3.73<br>(4.59)       |
| expenditures home 2017 computer installation total amount expenditures miscellaneous 2017 wigs and hairpieces total amount                                        | 0.07<br>(0.05)       |
| expenditures home 2017 infants furniture total amount expenditures miscellaneous 2017 wigs and hairpieces total amount                                            | 3.03<br>(2.00)       |
| expenditures home 2017 repair of tv radio and sound equipment total amount expenditures miscellaneous 2017 wigs and hairpieces total amount                       | 0.49<br>(0.35)       |
| expenditures home 2017 c ds records audio tapes total amount expenditures miscellaneous 2017 wigs and hairpieces total amount                                     | 2.46<br>(1.40)       |
| expenditures home 2017 boys uniforms and active sportswear total amount expenditures miscellaneous 2017 wigs and hairpieces total amount                          | 5.57<br>(3.66)       |
| expenditures home 2017 girls active sportswear total amount expenditures miscellaneous 2017 wigs and hairpieces total amount                                      | 4.40<br>(2.35)       |
| expenditures home 2017 girls costumes total amount expenditures miscellaneous 2017 wigs and hairpieces total amount                                               | 0.90<br>(0.46)       |
| expenditures miscellaneous 2017 auto truck rental total amount expenditures miscellaneous 2017 wigs and hairpieces total amount                                   | 15.64<br>(11.30)     |
| expenditures miscellaneous 2017 termination fee for car truck lease total amount expenditures miscellaneous 2017 wigs and hairpieces total amount                 | 0.15<br>(0.12)       |
| expenditures miscellaneous 2017 gas tank repair replacement total amount expenditures miscellaneous 2017 wigs and hairpieces total amount                         | 3.95<br>(1.59)       |
| expenditures miscellaneous 2017 value surrender of whole life insurance policy total amount expenditures miscellaneous 2017 wigs and hairpieces total amount      | 2752.00<br>(1629.23) |
| expenditures miscellaneous 2017 day care centers nursery and preschools total amount expenditures miscellaneous 2017 wigs and hairpieces total amount             | 123.27<br>(73.04)    |
| expenditures miscellaneous 2017 watches total amount expenditures miscellaneous 2017 wigs and hairpieces total amount                                             | 23.61<br>(16.27)     |
| expenditures miscellaneous 2017 coin operated apparel laundry and dry cleaning total amount expenditures miscellaneous 2017 wigs and hairpieces total amount      | 14.19<br>(15.34)     |
| expenditures miscellaneous 2017 apparel laundry and dry cleaning not coin operated total amount expenditures miscellaneous 2017 wigs and hairpieces total amount  | 16.24<br>(11.76)     |
| expenditures miscellaneous 2017 parking fees total amount expenditures miscellaneous 2017 wigs and hairpieces total amount                                        | 16.95<br>(10.45)     |
| expenditures miscellaneous 2017 parking fees in home city excluding residence total amount expenditures miscellaneous 2017 wigs and hairpieces total amount       | 14.50<br>(9.10)      |
| expenditures miscellaneous 2017 intracity mass transit fares total amount expenditures miscellaneous 2017 wigs and hairpieces total amount                        | 33.82<br>(33.34)     |

|                                                                                                                                                                  |                      |
|------------------------------------------------------------------------------------------------------------------------------------------------------------------|----------------------|
| expenditures miscellaneous 2017 school bus total amount expenditures miscellaneous 2017 wigs and hairpieces total amount                                         | 2.24<br>(1.40)       |
| expenditures miscellaneous 2017 medicare payments total amount expenditures miscellaneous 2017 wigs and hairpieces total amount                                  | 147.61<br>(92.88)    |
| expenditures miscellaneous 2017 medical equipment for general use total amount expenditures miscellaneous 2017 wigs and hairpieces total amount                  | 1.45<br>(0.77)       |
| expenditures miscellaneous 2017 playground equipment total amount expenditures miscellaneous 2017 wigs and hairpieces total amount                               | 1.32<br>(0.62)       |
| expenditures miscellaneous 2017 camping equipment total amount expenditures miscellaneous 2017 wigs and hairpieces total amount                                  | 4.20<br>(2.66)       |
| expenditures miscellaneous 2017 global positioning system devices total amount expenditures miscellaneous 2017 wigs and hairpieces total amount                  | 0.58<br>(1.11)       |
| expenditures miscellaneous 2017 other photographic supplies total amount expenditures miscellaneous 2017 wigs and hairpieces total amount                        | 0.19<br>(0.09)       |
| expenditures miscellaneous 2017 photographic equipment total amount expenditures miscellaneous 2017 wigs and hairpieces total amount                             | 6.42<br>(4.58)       |
| expenditures miscellaneous 2017 visual goods total amount expenditures miscellaneous 2017 wigs and hairpieces total amount                                       | 0.28<br>(0.12)       |
| expenditures miscellaneous 2017 digital book readers total amount expenditures miscellaneous 2017 wigs and hairpieces total amount                               | 8.49<br>(5.53)       |
| expenditures miscellaneous 2017 occupational expenses total amount expenditures miscellaneous 2017 wigs and hairpieces total amount                              | 15.97<br>(9.96)      |
| expenditures miscellaneous 2017 vacation clubs total amount expenditures miscellaneous 2017 wigs and hairpieces total amount                                     | 9.85<br>(6.46)       |
| expenditures miscellaneous 2017 support for college students total amount expenditures miscellaneous 2017 wigs and hairpieces total amount                       | 36.02<br>(22.54)     |
| Inpatient Days (mean(SD))                                                                                                                                        |                      |
| expenditures food 2017 lunch at vending machines and mobile vendors expenditures miscellaneous 2017 coin operated apparel laundry and dry cleaning               | 77.72<br>(15.55)     |
| expenditures food 2017 dinner at employer and school cafeterias expenditures miscellaneous 2017 coin operated apparel laundry and dry cleaning                   | 34.81<br>(8.09)      |
| expenditures food 2017 breakfast and brunch at full service restaurants expenditures miscellaneous 2017 coin operated apparel laundry and dry cleaning           | 705.35<br>(139.62)   |
| expenditures food 2017 education expenditures miscellaneous 2017 coin operated apparel laundry and dry cleaning                                                  | 8667.61<br>(1985.91) |
| expenditures food 2017 college tuition expenditures miscellaneous 2017 coin operated apparel laundry and dry cleaning                                            | 5254.71<br>(1272.63) |
| expenditures food 2017 test preparation tutoring services expenditures miscellaneous 2017 coin operated apparel laundry and dry cleaning                         | 111.37<br>(38.17)    |
| expenditures food 2017 other schools tuition expenditures miscellaneous 2017 coin operated apparel laundry and dry cleaning                                      | 54.11<br>(14.73)     |
| expenditures food 2017 other school expenses including rentals expenditures miscellaneous 2017 coin operated apparel laundry and dry cleaning                    | 282.00<br>(60.72)    |
| expenditures food 2017 school books supplies equipment for elementary high school expenditures miscellaneous 2017 coin operated apparel laundry and dry cleaning | 101.22<br>(21.86)    |
| expenditures food 2017 school lunches expenditures miscellaneous 2017 coin operated apparel laundry and dry cleaning                                             | 376.04<br>(82.27)    |
| expenditures food 2017 meals as pay expenditures miscellaneous 2017 coin operated apparel laundry and dry cleaning                                               | 161.31<br>(44.87)    |

|                                                                                                                                                                    |                       |
|--------------------------------------------------------------------------------------------------------------------------------------------------------------------|-----------------------|
| expenditures food 2017 wine expenditures miscellaneous 2017 coin operated apparel laundry and dry cleaning                                                         | 809.71<br>(178.76)    |
| expenditures food 2017 alcoholic beverages purchased on trips expenditures miscellaneous 2017 coin operated apparel laundry and dry cleaning                       | 366.36<br>(84.19)     |
| expenditures food 2017 fresh fish and shellfish expenditures miscellaneous 2017 coin operated apparel laundry and dry cleaning                                     | 381.41<br>(81.02)     |
| expenditures food 2017 artificial sweeteners expenditures miscellaneous 2017 coin operated apparel laundry and dry cleaning                                        | 24.82<br>(5.18)       |
| expenditures food 2017 jams preserves other sweets expenditures miscellaneous 2017 coin operated apparel laundry and dry cleaning                                  | 173.85<br>(35.32)     |
| expenditures food 2017 fats and oils expenditures miscellaneous 2017 coin operated apparel laundry and dry cleaning                                                | 204.74<br>(42.74)     |
| expenditures food 2017 prepared desserts expenditures miscellaneous 2017 coin operated apparel laundry and dry cleaning                                            | 77.25<br>(15.39)      |
| expenditures food 2017 baby food expenditures miscellaneous 2017 coin operated apparel laundry and dry cleaning                                                    | 196.39<br>(41.19)     |
| expenditures home 2017 telephones and accessories expenditures miscellaneous 2017 coin operated apparel laundry and dry cleaning                                   | 314.84<br>(96.13)     |
| expenditures home 2017 lawn and garden equipment expenditures miscellaneous 2017 coin operated apparel laundry and dry cleaning                                    | 327.61<br>(77.22)     |
| expenditures home 2017 office furniture for home use expenditures miscellaneous 2017 coin operated apparel laundry and dry cleaning                                | 43.61<br>(15.70)      |
| expenditures home 2017 mens sportcoats tailored jackets expenditures miscellaneous 2017 coin operated apparel laundry and dry cleaning                             | 48.83<br>(15.46)      |
| expenditures home 2017 womens sportcoats tailored jackets expenditures miscellaneous 2017 coin operated apparel laundry and dry cleaning                           | 52.74<br>(21.39)      |
| expenditures home 2017 rent expenditures miscellaneous 2017 coin operated apparel laundry and dry cleaning                                                         | 19062.75<br>(9193.11) |
| expenditures home 2017 rent as pay expenditures miscellaneous 2017 coin operated apparel laundry and dry cleaning                                                  | 485.40<br>(256.49)    |
| expenditures home 2017 maintenance insurance and other expenses rented expenditures miscellaneous 2017 coin operated apparel laundry and dry cleaning              | 609.61<br>(166.28)    |
| expenditures home 2017 electricity expenditures miscellaneous 2017 coin operated apparel laundry and dry cleaning                                                  | 8168.55<br>(2053.92)  |
| expenditures home 2017 housekeeping services expenditures miscellaneous 2017 coin operated apparel laundry and dry cleaning                                        | 961.52<br>(304.35)    |
| expenditures home 2017 coin operated household laundry and dry cleaning nonclothing expenditures miscellaneous 2017 coin operated apparel laundry and dry cleaning | 55.87<br>(28.45)      |
| expenditures home 2017 home security system service fee expenditures miscellaneous 2017 coin operated apparel laundry and dry cleaning                             | 170.91<br>(43.60)     |
| expenditures home 2017 rental of televisions expenditures miscellaneous 2017 coin operated apparel laundry and dry cleaning                                        | 3.34<br>(3.35)        |
| expenditures home 2017 boys uniforms and active sportswear expenditures miscellaneous 2017 coin operated apparel laundry and dry cleaning                          | 92.32<br>(19.89)      |
| expenditures home 2017 maintenance and repair services rented expenditures miscellaneous 2017 coin operated apparel laundry and dry cleaning                       | 214.60<br>(58.99)     |
| expenditures home 2017 womens hosiery expenditures miscellaneous 2017 coin operated apparel laundry and dry cleaning                                               | 128.41<br>(27.17)     |
| expenditures home 2017 girls coats and jackets expenditures miscellaneous 2017 coin operated apparel laundry and dry cleaning                                      | 31.87<br>(6.98)       |

|                                                                                                                                                                    |                            |
|--------------------------------------------------------------------------------------------------------------------------------------------------------------------|----------------------------|
| expenditures home 2017 girls footwear expenditures miscellaneous 2017 coin operated apparel laundry and dry cleaning                                               | 235.72<br>(57.57)          |
| expenditures miscellaneous 2017 auto truck rental expenditures miscellaneous 2017 coin operated apparel laundry and dry cleaning                                   | 255.28<br>(65.58)          |
| expenditures miscellaneous 2017 finance late interest charges for student loans expenditures miscellaneous 2017 coin operated apparel laundry and dry cleaning     | 882.47<br>(229.52)         |
| expenditures miscellaneous 2017 gas tank repair replacement expenditures miscellaneous 2017 coin operated apparel laundry and dry cleaning                         | 71.16<br>(16.47)           |
| expenditures miscellaneous 2017 newspapers expenditures miscellaneous 2017 coin operated apparel laundry and dry cleaning                                          | 0.23<br>(0.05)             |
| expenditures miscellaneous 2017 value surrender of whole life insurance policy expenditures miscellaneous 2017 coin operated apparel laundry and dry cleaning      | 47120.16<br>(15387.72<br>) |
| expenditures miscellaneous 2017 watches expenditures miscellaneous 2017 coin operated apparel laundry and dry cleaning                                             | 397.39<br>(164.59)         |
| expenditures miscellaneous 2017 watch and jewelry repair expenditures miscellaneous 2017 coin operated apparel laundry and dry cleaning                            | 172.63<br>(84.99)          |
| expenditures miscellaneous 2017 apparel laundry and dry cleaning not coin operated expenditures miscellaneous 2017 coin operated apparel laundry and dry cleaning  | 266.66<br>(86.03)          |
| expenditures miscellaneous 2017 rented vehicles expenditures miscellaneous 2017 coin operated apparel laundry and dry cleaning                                     | 394.40<br>(98.44)          |
| expenditures miscellaneous 2017 towing charges expenditures miscellaneous 2017 coin operated apparel laundry and dry cleaning                                      | 23.95<br>(7.20)            |
| expenditures miscellaneous 2017 public and other transportation expenditures miscellaneous 2017 coin operated apparel laundry and dry cleaning                     | 4050.25<br>(1195.95)       |
| expenditures miscellaneous 2017 intracity mass transit fares expenditures miscellaneous 2017 coin operated apparel laundry and dry cleaning                        | 515.43<br>(190.84)         |
| expenditures miscellaneous 2017 school bus expenditures miscellaneous 2017 coin operated apparel laundry and dry cleaning                                          | 39.99<br>(22.24)           |
| expenditures miscellaneous 2017 rental of supportive convalescent medical equipment expenditures miscellaneous 2017 coin operated apparel laundry and dry cleaning | 3.17<br>(0.74)             |
| expenditures miscellaneous 2017 global positioning system devices expenditures miscellaneous 2017 coin operated apparel laundry and dry cleaning                   | 6.81<br>(7.39)             |
| expenditures miscellaneous 2017 photographic equipment expenditures miscellaneous 2017 coin operated apparel laundry and dry cleaning                              | 105.22<br>(28.97)          |
| expenditures miscellaneous 2017 wigs and hairpieces expenditures miscellaneous 2017 coin operated apparel laundry and dry cleaning                                 | 14.24<br>(15.39)           |
| expenditures miscellaneous 2017 vacation clubs expenditures miscellaneous 2017 coin operated apparel laundry and dry cleaning                                      | 171.30<br>(86.03)          |
| expenditures miscellaneous 2017 child support expenditures expenditures miscellaneous 2017 coin operated apparel laundry and dry cleaning                          | 1222.24<br>(264.80)        |
| expenditures miscellaneous 2017 cash contribution to educational institutions expenditures miscellaneous 2017 coin operated apparel laundry and dry cleaning       | 226.77<br>(85.28)          |
| Hospital Expenditures (mean(SD))                                                                                                                                   |                            |
| expenditures food 2017 lunch at vending machines and mobile vendors expenditures miscellaneous 2017 coin operated apparel laundry and dry cleaning                 | 77.72<br>(15.55)           |
| expenditures food 2017 dinner at employer and school cafeterias expenditures miscellaneous 2017 coin operated apparel laundry and dry cleaning                     | 34.81<br>(8.09)            |

|                                                                                                                                                                  |                       |
|------------------------------------------------------------------------------------------------------------------------------------------------------------------|-----------------------|
| expenditures food 2017 breakfast and brunch at full service restaurants expenditures miscellaneous 2017 coin operated apparel laundry and dry cleaning           | 705.35<br>(139.62)    |
| expenditures food 2017 education expenditures miscellaneous 2017 coin operated apparel laundry and dry cleaning                                                  | 8667.61<br>(1985.91)  |
| expenditures food 2017 college tuition expenditures miscellaneous 2017 coin operated apparel laundry and dry cleaning                                            | 5254.71<br>(1272.63)  |
| expenditures food 2017 test preparation tutoring services expenditures miscellaneous 2017 coin operated apparel laundry and dry cleaning                         | 111.37<br>(38.17)     |
| expenditures food 2017 other schools tuition expenditures miscellaneous 2017 coin operated apparel laundry and dry cleaning                                      | 54.11<br>(14.73)      |
| expenditures food 2017 other school expenses including rentals expenditures miscellaneous 2017 coin operated apparel laundry and dry cleaning                    | 282.00<br>(60.72)     |
| expenditures food 2017 school books supplies equipment for elementary high school expenditures miscellaneous 2017 coin operated apparel laundry and dry cleaning | 101.22<br>(21.86)     |
| expenditures food 2017 school lunches expenditures miscellaneous 2017 coin operated apparel laundry and dry cleaning                                             | 376.04<br>(82.27)     |
| expenditures food 2017 meals as pay expenditures miscellaneous 2017 coin operated apparel laundry and dry cleaning                                               | 161.31<br>(44.87)     |
| expenditures food 2017 wine expenditures miscellaneous 2017 coin operated apparel laundry and dry cleaning                                                       | 809.71<br>(178.76)    |
| expenditures food 2017 alcoholic beverages purchased on trips expenditures miscellaneous 2017 coin operated apparel laundry and dry cleaning                     | 366.36<br>(84.19)     |
| expenditures food 2017 fresh fish and shellfish expenditures miscellaneous 2017 coin operated apparel laundry and dry cleaning                                   | 381.41<br>(81.02)     |
| expenditures food 2017 artificial sweeteners expenditures miscellaneous 2017 coin operated apparel laundry and dry cleaning                                      | 24.82<br>(5.18)       |
| expenditures food 2017 jams preserves other sweets expenditures miscellaneous 2017 coin operated apparel laundry and dry cleaning                                | 173.85<br>(35.32)     |
| expenditures food 2017 fats and oils expenditures miscellaneous 2017 coin operated apparel laundry and dry cleaning                                              | 204.74<br>(42.74)     |
| expenditures food 2017 prepared desserts expenditures miscellaneous 2017 coin operated apparel laundry and dry cleaning                                          | 77.25<br>(15.39)      |
| expenditures food 2017 baby food expenditures miscellaneous 2017 coin operated apparel laundry and dry cleaning                                                  | 196.39<br>(41.19)     |
| expenditures home 2017 telephones and accessories expenditures miscellaneous 2017 coin operated apparel laundry and dry cleaning                                 | 314.84<br>(96.13)     |
| expenditures home 2017 lawn and garden equipment expenditures miscellaneous 2017 coin operated apparel laundry and dry cleaning                                  | 327.61<br>(77.22)     |
| expenditures home 2017 office furniture for home use expenditures miscellaneous 2017 coin operated apparel laundry and dry cleaning                              | 43.61<br>(15.70)      |
| expenditures home 2017 mens sportcoats tailored jackets expenditures miscellaneous 2017 coin operated apparel laundry and dry cleaning                           | 48.83<br>(15.46)      |
| expenditures home 2017 womens sportcoats tailored jackets expenditures miscellaneous 2017 coin operated apparel laundry and dry cleaning                         | 52.74<br>(21.39)      |
| expenditures home 2017 rent expenditures miscellaneous 2017 coin operated apparel laundry and dry cleaning                                                       | 19062.75<br>(9193.11) |
| expenditures home 2017 rent as pay expenditures miscellaneous 2017 coin operated apparel laundry and dry cleaning                                                | 485.40<br>(256.49)    |
| expenditures home 2017 maintenance insurance and other expenses rented expenditures miscellaneous 2017 coin operated apparel laundry and dry cleaning            | 609.61<br>(166.28)    |

|                                                                                                                                                                    |                            |
|--------------------------------------------------------------------------------------------------------------------------------------------------------------------|----------------------------|
| expenditures home 2017 electricity expenditures miscellaneous 2017 coin operated apparel laundry and dry cleaning                                                  | 8168.55<br>(2053.92)       |
| expenditures home 2017 housekeeping services expenditures miscellaneous 2017 coin operated apparel laundry and dry cleaning                                        | 961.52<br>(304.35)         |
| expenditures home 2017 coin operated household laundry and dry cleaning nonclothing expenditures miscellaneous 2017 coin operated apparel laundry and dry cleaning | 55.87<br>(28.45)           |
| expenditures home 2017 home security system service fee expenditures miscellaneous 2017 coin operated apparel laundry and dry cleaning                             | 170.91<br>(43.60)          |
| expenditures home 2017 rental of televisions expenditures miscellaneous 2017 coin operated apparel laundry and dry cleaning                                        | 3.34<br>(3.35)             |
| expenditures home 2017 boys uniforms and active sportswear expenditures miscellaneous 2017 coin operated apparel laundry and dry cleaning                          | 92.32<br>(19.89)           |
| expenditures home 2017 maintenance and repair services rented expenditures miscellaneous 2017 coin operated apparel laundry and dry cleaning                       | 214.60<br>(58.99)          |
| expenditures home 2017 womens hosiery expenditures miscellaneous 2017 coin operated apparel laundry and dry cleaning                                               | 128.41<br>(27.17)          |
| expenditures home 2017 girls coats and jackets expenditures miscellaneous 2017 coin operated apparel laundry and dry cleaning                                      | 31.87<br>(6.98)            |
| expenditures home 2017 girls footwear expenditures miscellaneous 2017 coin operated apparel laundry and dry cleaning                                               | 235.72<br>(57.57)          |
| expenditures miscellaneous 2017 auto truck rental expenditures miscellaneous 2017 coin operated apparel laundry and dry cleaning                                   | 255.28<br>(65.58)          |
| expenditures miscellaneous 2017 finance late interest charges for student loans expenditures miscellaneous 2017 coin operated apparel laundry and dry cleaning     | 882.47<br>(229.52)         |
| expenditures miscellaneous 2017 gas tank repair replacement expenditures miscellaneous 2017 coin operated apparel laundry and dry cleaning                         | 71.16<br>(16.47)           |
| expenditures miscellaneous 2017 newspapers expenditures miscellaneous 2017 coin operated apparel laundry and dry cleaning                                          | 0.23<br>(0.05)             |
| expenditures miscellaneous 2017 value surrender of whole life insurance policy expenditures miscellaneous 2017 coin operated apparel laundry and dry cleaning      | 47120.16<br>(15387.72<br>) |
| expenditures miscellaneous 2017 watches expenditures miscellaneous 2017 coin operated apparel laundry and dry cleaning                                             | 397.39<br>(164.59)         |
| expenditures miscellaneous 2017 watch and jewelry repair expenditures miscellaneous 2017 coin operated apparel laundry and dry cleaning                            | 172.63<br>(84.99)          |
| expenditures miscellaneous 2017 apparel laundry and dry cleaning not coin operated expenditures miscellaneous 2017 coin operated apparel laundry and dry cleaning  | 266.66<br>(86.03)          |
| expenditures miscellaneous 2017 rented vehicles expenditures miscellaneous 2017 coin operated apparel laundry and dry cleaning                                     | 394.40<br>(98.44)          |
| expenditures miscellaneous 2017 towing charges expenditures miscellaneous 2017 coin operated apparel laundry and dry cleaning                                      | 23.95<br>(7.20)            |
| expenditures miscellaneous 2017 public and other transportation expenditures miscellaneous 2017 coin operated apparel laundry and dry cleaning                     | 4050.25<br>(1195.95)       |
| expenditures miscellaneous 2017 intracity mass transit fares expenditures miscellaneous 2017 coin operated apparel laundry and dry cleaning                        | 515.43<br>(190.84)         |
| expenditures miscellaneous 2017 school bus expenditures miscellaneous 2017 coin operated apparel laundry and dry cleaning                                          | 39.99<br>(22.24)           |
| expenditures miscellaneous 2017 rental of supportive convalescent medical equipment expenditures miscellaneous 2017 coin operated apparel laundry and dry cleaning | 3.17<br>(0.74)             |

|                                                                                                                                                              |                     |
|--------------------------------------------------------------------------------------------------------------------------------------------------------------|---------------------|
| expenditures miscellaneous 2017 global positioning system devices expenditures miscellaneous 2017 coin operated apparel laundry and dry cleaning             | 6.81<br>(7.39)      |
| expenditures miscellaneous 2017 photographic equipment expenditures miscellaneous 2017 coin operated apparel laundry and dry cleaning                        | 105.22<br>(28.97)   |
| expenditures miscellaneous 2017 wigs and hairpieces expenditures miscellaneous 2017 coin operated apparel laundry and dry cleaning                           | 14.24<br>(15.39)    |
| expenditures miscellaneous 2017 vacation clubs expenditures miscellaneous 2017 coin operated apparel laundry and dry cleaning                                | 171.30<br>(86.03)   |
| expenditures miscellaneous 2017 child support expenditures expenditures miscellaneous 2017 coin operated apparel laundry and dry cleaning                    | 1222.24<br>(264.80) |
| expenditures miscellaneous 2017 cash contribution to educational institutions expenditures miscellaneous 2017 coin operated apparel laundry and dry cleaning | 226.77<br>(85.28)   |

HH=Household

Fam=Family

Pop=Population

Non Fam=Non family

OT=Other

ER=Emergency room

RV=recreational vehicle

Equip=equipment

Misc.=miscellaneous

BCBS=Blue Cross Blue Shield

OOT=Out of town

RIHC=resource intensive healthcare
