# Supplementary material for: Can diverse population characteristics be leveraged in a machine learning pipeline to predict resource intensive healthcare utilization among hospital service areas?
Source: Springer Nature journal article supplement (doi:10.1186/s12913-022-08154-4), 2022-06-30

## Additional File 11. QQ Plots with Orthonormal Scale for Predicted and Actual Outcome Values from Machine Learning Prediction Models

- Additional File 11
  - File format: PDF
  - File title: QQ Plots with Orthonormal Scale for Predicted and Actual Outcome Values from Machine Learning Prediction Models
  - File description: Additional figure to complement prediction model results with an orthonormal scale

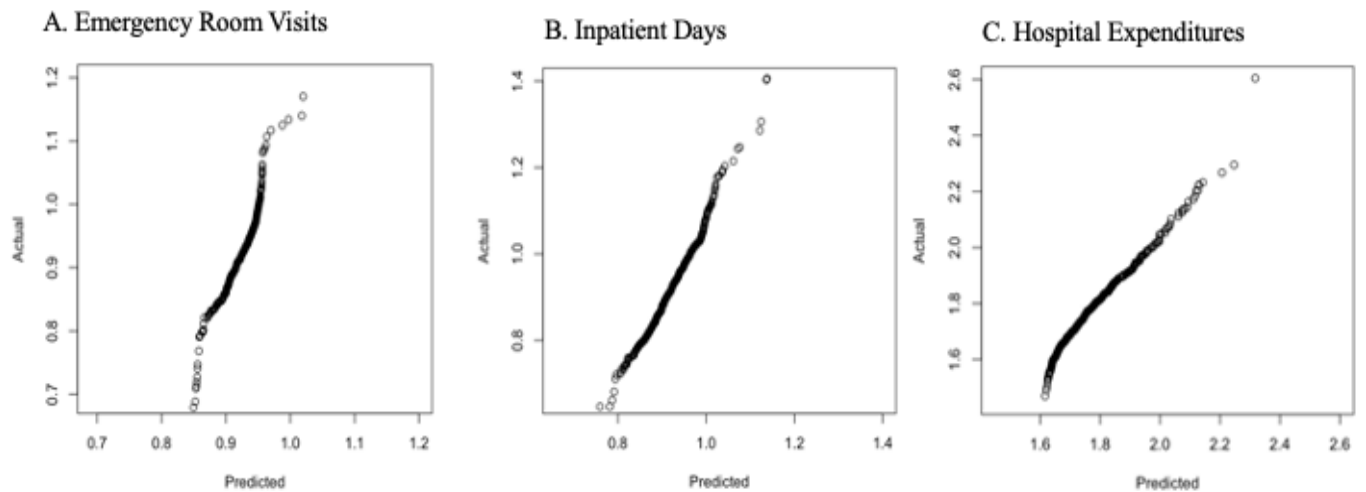

Supplement: MOESM11 [file 23224174]
