# Supplementary material for: Can diverse population characteristics be leveraged in a machine learning pipeline to predict resource intensive healthcare utilization among hospital service areas?
Source: Springer Nature journal article supplement (doi:10.1186/s12913-022-08154-4), 2022-06-30
Supplement: MOESM12 [file 23224174]

## Additional File 12. Variable Importance from Best Performing Machine Learning Model for Log ER Visits per Capita

- Additional File 12
  - File format: PDF
  - File title: Variable Importance from Best Performing Machine Learning Model for Log ER Visits per Capita
  - File description: Long table, prediction model output for log ER visits per capita

|                                                                                                                                              | Variable Importance |
|----------------------------------------------------------------------------------------------------------------------------------------------|---------------------|
| census employment 2017 employment civilian males pop 16 persons                                                                              | 12.278              |
| census employment 2017 employment agriculture forestry fishing and hunting pop 16 persons                                                    | 10.825              |
| census demographics 2017 families married families                                                                                           | 10.290              |
| census demographics 2017 family head of household female households                                                                          | 10.009              |
| expenditures miscellaneous 2017 adult diapers total amount                                                                                   | 9.732               |
| census demographics 2017 households with no vehicles households                                                                              | 9.477               |
| health children 2017 hay fever count of households persons                                                                                   | 9.440               |
| census demographics 2017 family head of household male households                                                                            | 9.379               |
| census housing units 2017 housing owner households valued 25000 29999 count housing units                                                    | 8.617               |
| census employment 2017 employment work at home empl 16 persons                                                                               | 8.501               |
| census employment 2017 employment self employed workers in own not incorporated business pop 16 persons                                      | 8.467               |
| expenditures home 2017 ground rent total amount                                                                                              | 8.224               |
| census demographics 2017 non families 7 or more person households                                                                            | 8.167               |
| health children 2017 all persons with a usual place of health care emergency room count of households persons                                | 7.398               |
| health children 2017 skin allergies count of households persons                                                                              | 7.264               |
| census housing units 2017 housing built 1940 to 1949 count housing units                                                                     | 7.257               |
| health children 2017 emergency room visits in past 12 months for children under 18 one count of households persons                           | 7.242               |
| expenditures miscellaneous 2017 gift to non cu members of stocks bonds and mutual funds total amount                                         | 7.211               |
| census employment 2017 employment travel time 30 59 min empl 16 persons                                                                      | 7.158               |
| health children 2017 all persons with a usual place of health care hospital outpatient count of households persons                           | 7.075               |
| health children 2017 respiratory allergies count of households persons                                                                       | 6.879               |
| census demographics 2017 non families aged 75 years and over households                                                                      | 6.854               |
| health children 2017 children 2 17 years more than 2 years but not more than 5 years ago since last dental visit count of households persons | 6.776               |

|                                                                                                                                           |       |
|-------------------------------------------------------------------------------------------------------------------------------------------|-------|
| census demographics 2017 families 3 person families                                                                                       | 6.752 |
| health children 2017 children receiving special education or early intervention services count of households persons                      | 6.685 |
| census housing units 2017 housing median year moved in count year census housing units 2017 housing median year built count year          | 6.484 |
| expenditures food 2017 college tuition total amount                                                                                       | 6.468 |
| health children 2017 all persons with a usual place of health care some other place count of households persons                           | 6.468 |
| census demographics 2017 household income average                                                                                         | 6.308 |
| census housing units 2017 housing median rent count census housing units 2017 housing median year built count year                        | 6.151 |
| health children 2017 number school days missed in past 12 months due to illness or injury aged 5 17 6 10 days count of households persons | 6.124 |
| census employment 2017 employment walked to work empl 16 persons                                                                          | 6.119 |
| health children 2017 prescription medication taken regularly for at least 3 months count of households persons                            | 6.086 |
| census demographics 2017 households median size number persons                                                                            | 6.025 |
| census demographics 2017 households with 4 vehicles households                                                                            | 5.974 |
| census employment 2017 employment travel time 15 29 min empl 16 persons                                                                   | 5.953 |
| census housing units 2017 housing rent 500 749 count housing units                                                                        | 5.947 |
| census employment 2017 employment private not for profit wage and salary workers pop 16 persons                                           | 5.826 |
| health children 2017 very good health status respondent assessed count of households persons                                              | 5.788 |
| health children 2017 food allergies count of households persons                                                                           | 5.749 |
| census employment 2017 employment not in the labor force female pop 16 persons                                                            | 5.721 |
| expenditures miscellaneous 2017 rental of medical equipment total amount                                                                  | 5.683 |
| census demographics 2017 asian population alone persons                                                                                   | 5.649 |
| census housing units 2017 housing owner households valued 40000 49999 count housing units                                                 | 5.592 |
| census housing units 2017 housing owner households valued 150000 174999 count housing units                                               | 5.590 |
| census housing units 2017 housing owner households valued 20000 24999 count housing units                                                 | 5.575 |
| health children 2017 children 2 17 years more than 1 year but not more than 2 years since last dental visit count of households persons   | 5.569 |
| expenditures home 2017 infant nightwear loungewear total amount                                                                           | 5.551 |
| census housing units 2017 housing rent 1250 1499 count housing units                                                                      | 5.516 |
| census employment 2017 employment accommodation and food services pop 16 persons                                                          | 5.500 |
| census employment 2017 occupation professional and related pop 16 persons                                                                 | 5.465 |
| health children 2017 children 3 to 17 learning disability count of households persons                                                     | 5.458 |
| census demographics 2017 households with income 15000 to 24999 households                                                                 | 5.431 |

|                                                                                                                                                        |       |
|--------------------------------------------------------------------------------------------------------------------------------------------------------|-------|
| census employment 2017 employment private for profit wage and salary workers self pop 16 persons                                                       | 5.418 |
| census housing units 2017 housing median rent count                                                                                                    | 5.413 |
| health children 2017 last health care professional visit 6 months or less count of households persons                                                  | 5.398 |
| census demographics 2017 population citizenship native persons                                                                                         | 5.334 |
| census housing units 2017 housing built 1950 to 1959 count housing units                                                                               | 5.333 |
| expenditures home 2017 infants equipment total amount                                                                                                  | 5.286 |
| health children 2017 number school days missed in past 12 months due to illness or injury aged 5 17 3 5 days count of households persons               | 5.270 |
| expenditures miscellaneous 2017 photographic equipment total amount                                                                                    | 5.210 |
| census demographics 2017 education enrolled private grades 5 8 pop 3 persons                                                                           | 5.186 |
| health children 2017 children 2 17 years more than 6 months but less than 1 year since last dental visit count of households persons                   | 5.180 |
| health adults 2017 full guidelines strengthening and aerobic combined met both muscle strengthening and aerobic guidelines count of households persons | 5.137 |
| census demographics 2017 families married with children under 18 families                                                                              | 5.131 |
| census demographics 2017 family median size number persons                                                                                             | 5.116 |
| census housing units 2017 housing rent less than 250 count housing units                                                                               | 5.103 |
| expenditures miscellaneous 2017 day care centers nursery and preschools total amount                                                                   | 5.061 |
| census employment 2017 employment unemployed female pop 16 persons                                                                                     | 5.006 |
| census demographics 2017 education attainment professional degree pop 25 persons                                                                       | 5.001 |
| census employment 2017 occupation construction extraction and maintenance pop 16 persons                                                               | 4.982 |
| health children 2017 last health care professional visit more than 1 year but not more than 2 years ago count of households persons                    | 4.944 |
| health adults 2017 alcohol current infrequent count of households persons                                                                              | 4.942 |
| health adults 2017 type some other place count of households persons                                                                                   | 4.928 |
| census demographics 2017 families aged under 25 years families                                                                                         | 4.902 |
| census housing units 2017 housing structure with 10 19 units count housing units                                                                       | 4.884 |
| health adults 2017 last doctor visit more than 2 years but less than 5 years ago count of households persons                                           | 4.865 |
| expenditures home 2017 boys uniforms and active sportswear total amount                                                                                | 4.844 |
| health children 2017 number school days missed in past 12 months due to illness or injury aged 5 17 11 or more days count of households persons        | 4.814 |
| health children 2017 children 2 17 years less than 6 months since last dental visit count of households persons                                        | 4.803 |
| census housing units 2017 housing structure with 50 units count housing units                                                                          | 4.795 |
| census housing units 2017 housing structure with 5 9 units count housing units                                                                         | 4.755 |
| census housing units 2017 housing built 2000 to 2009 count housing units                                                                               | 4.753 |

|                                                                                                                                |       |
|--------------------------------------------------------------------------------------------------------------------------------|-------|
| census demographics 2017 non families 5 person households                                                                      | 4.687 |
| expenditures miscellaneous 2017 shoe repair and other shoe service total amount                                                | 4.664 |
| health children 2017 unmet medical need count of households persons                                                            | 4.649 |
| census housing units 2017 housing owner households valued less than 10000 count housing units                                  | 4.649 |
| expenditures home 2017 boys hosiery total amount                                                                               | 4.583 |
| census demographics 2017 education enrolled public graduate or professional school pop 3 persons                               | 4.582 |
| census demographics 2017 two or more races head of households households                                                       | 4.566 |
| census demographics 2017 population citizenship foreign born not a citizen persons                                             | 4.558 |
| census demographics 2017 households 3 person households                                                                        | 4.556 |
| expenditures home 2017 applications games ringtones for handheld devices total amount                                          | 4.542 |
| census demographics 2017 two or more races population persons                                                                  | 4.533 |
| health adults 2017 last dental visit more than 1 year but not more than 2 years ago count of households persons                | 4.484 |
| census housing units 2017 housing year moved in 1970 to 1979 count housing units                                               | 4.433 |
| census demographics 2017 american indian and alaska native head of households households                                       | 4.430 |
| census demographics 2017 households with income less than 15000 households                                                     | 4.423 |
| health adults 2017 some day smokers count of households persons                                                                | 4.410 |
| health adults 2017 all persons without a usual place of health care count of households persons                                | 4.401 |
| health children 2017 delayed care due to cost count of households persons                                                      | 4.389 |
| census demographics 2017 householder aged 35 to 44 years households                                                            | 4.378 |
| health adults 2017 stroke count of households persons                                                                          | 4.371 |
| expenditures food 2017 food or board at school total amount                                                                    | 4.357 |
| census housing units 2017 housing year moved in 2000 to 2009 count housing units                                               | 4.356 |
| health children 2017 emergency room visits in past 12 months for children under 18 two or more count of households persons     | 4.331 |
| health adults 2017 hay fever count of households persons                                                                       | 4.316 |
| census employment 2017 employment unpaid family workers pop 16 persons                                                         | 4.299 |
| health adults 2017 liver disease count of households persons                                                                   | 4.277 |
| census employment 2017 occupation service pop 16 persons                                                                       | 4.249 |
| health children 2017 all persons with a usual place of health care clinic count of households persons                          | 4.227 |
| expenditures miscellaneous 2017 rental of supportive convalescent medical equipment total amount                               | 4.220 |
| health children 2017 last health care professional visit more than six months but less than 1 year count of households persons | 4.185 |
| census housing units 2017 housing built 1990 to 1999 count housing units                                                       | 4.172 |
| census demographics 2017 population institutional group quarters persons                                                       | 4.172 |

|                                                                                                                                                      |       |
|------------------------------------------------------------------------------------------------------------------------------------------------------|-------|
| health children 2017 number school days missed in past 12 months due to illness or injury aged 5 17 1 2 days count of households persons             | 4.083 |
| health children 2017 children 2 17 years more than 5 years since last dental visit count of households persons                                       | 3.983 |
| census housing units 2017 housing rent 750 999 count housing units                                                                                   | 3.981 |
| health children 2017 all persons without a usual place of health care count of households persons                                                    | 3.961 |
| census employment 2017 employment bicycle to work empl 16 persons                                                                                    | 3.909 |
| expenditures home 2017 mens nightwear total amount                                                                                                   | 3.903 |
| health children 2017 number school days missed in past 12 months due to illness or injury aged 5 17 did not go to school count of households persons | 3.847 |
| health children 2017 children 2 17 years no unmet dental need count of households persons                                                            | 3.837 |
| census demographics 2017 non families aged under 25 years households                                                                                 | 3.830 |
| health children 2017 children 2 17 years yes unmet dental need count of households persons                                                           | 3.830 |
| census employment 2017 employment blue collar pop 16 persons                                                                                         | 3.828 |
| census demographics 2017 population non institutional group quarters persons                                                                         | 3.772 |
| census demographics 2017 non families aged 55 to 64 years households                                                                                 | 3.701 |
| health adults 2017 last doctor visit never count of households persons                                                                               | 3.694 |
| health children 2017 last health care professional visit more than 2 years but less than 5 years ago count of households persons                     | 3.677 |
| census demographics 2017 education not enrolled in school pop 3 persons                                                                              | 3.665 |
| expenditures food 2017 cereals and cereal products total amount                                                                                      | 3.664 |
| census demographics 2017 other race population alone persons                                                                                         | 3.623 |
| census demographics 2017 education attainment high school pop 25 persons 2                                                                           | 3.606 |
| census employment 2017 employment local government workers pop 16 persons                                                                            | 3.602 |
| census employment 2017 employment health care and social assistance pop 16 persons                                                                   | 3.594 |
| health adults 2017 all current smokers count of households persons                                                                                   | 3.590 |
| census demographics 2017 education enrolled private preprimary pop 3 persons                                                                         | 3.578 |
| census employment 2017 employment real estate and rental and leasing pop 16 persons                                                                  | 3.569 |
| census demographics 2017 non family households female householder with people under 18 households                                                    | 3.492 |
| census employment 2017 employment unemployed males pop 16 persons                                                                                    | 3.469 |
| census demographics 2017 population urban persons                                                                                                    | 3.460 |
| census housing units 2017 home heating fuel wood count housing units                                                                                 | 3.406 |
| health adults 2017 last dental visit more than 2 years ago but not more than 5 years ago count of households persons                                 | 3.400 |
| census demographics 2017 other families female householder no husband present with no children under 18 other families                               | 3.313 |
| health adults 2017 last doctor visit more than 1 year but not more than 2 years ago count of households persons                                      | 3.306 |

|                                                                                                    |       |
|----------------------------------------------------------------------------------------------------|-------|
| health adults 2017 worthlessness all or most of the time count of households persons               | 3.301 |
| census demographics 2017 asian households households                                               | 3.292 |
| census demographics 2017 american indian and alaska native population alone persons                | 3.231 |
| census demographics 2017 non families aged 45 to 54 years households                               | 3.204 |
| health adults 2017 pain in face or jaw count of households persons                                 | 3.182 |
| health children 2017 all persons with a usual place of health care count of households persons     | 3.171 |
| census housing units 2017 housing owner households with mortgage any count households              | 3.142 |
| census housing units 2017 housing owner households valued 90000 99999 count housing units          | 3.097 |
| census housing units 2017 housing rent 1500 1999 count housing units                               | 3.080 |
| census employment 2017 employment car truck van to work carpool empl 16 persons                    | 3.066 |
| census housing units 2017 home heating fuel utility gas count housing units                        | 3.037 |
| census housing units 2017 housing year moved in 1990 to 1999 count housing units                   | 3.015 |
| census demographics 2017 families aged 55 to 64 years families                                     | 2.994 |
| census housing units 2017 housing owner households valued more than 1000000 count housing units    | 2.974 |
| health children 2017 fair of poor health status respondent assessed count of households persons    | 2.964 |
| census housing units 2017 housing structure with 2 units count housing units                       | 2.951 |
| census housing units 2017 housing renter occupied count housing units                              | 2.950 |
| census demographics 2017 education enrolled public grades 9 12 pop 3 persons                       | 2.949 |
| expenditures home 2017 girls uniforms total amount                                                 | 2.936 |
| census housing units 2017 housing owner households valued 60000 69999 count housing units          | 2.925 |
| census demographics 2017 black population alone persons                                            | 2.898 |
| census employment 2017 employment administrative and support and waste mgt services pop 16 persons | 2.867 |
| expenditures food 2017 bread and cracker products total amount                                     | 2.816 |
| health children 2017 good health status respondent assessed count of households persons            | 2.790 |
| expenditures food 2017 school books supplies equipment for college total amount                    | 2.730 |
| census employment 2017 employment travel time 90 min empl 16 persons                               | 2.657 |
| expenditures home 2017 infant coat jacket snowsuit total amount                                    | 2.645 |
| expenditures food 2017 snacks and nonalcoholic beverages at full service restaurants total amount  | 2.603 |
| census demographics 2017 population speaks other language pop 5 persons                            | 2.598 |
| census demographics 2017 non families aged 65 to 74 years households                               | 2.534 |
| census employment 2017 employment other transportation to work empl 16 persons                     | 2.532 |
| census demographics 2017 veterans total persons                                                    | 2.475 |
| expenditures home 2017 repair of tv radio and sound equipment total amount                         | 2.463 |

|                                                                                                        |        |
|--------------------------------------------------------------------------------------------------------|--------|
| census housing units 2017 housing owner households valued 80000 89999 count housing units              | 2.449  |
| census employment 2017 employment railroad to work empl 16 persons                                     | 2.332  |
| census employment 2017 employment motorcycle to work empl 16 persons                                   | 2.332  |
| census demographics 2017 education enrolled private graduate or professional school pop 3 persons      | 2.296  |
| expenditures home 2017 computer installation total amount                                              | 2.277  |
| census housing units 2017 housing built 1980 to 1989 count housing units                               | 2.217  |
| census employment 2017 employment armed forces male pop 16 persons                                     | 2.194  |
| census employment 2017 employment public administration pop 16 persons                                 | 2.157  |
| census employment 2017 employment potential pop 16 persons                                             | 2.119  |
| census demographics 2017 education enrolled private kindergarten pop 3 persons                         | 2.094  |
| census demographics 2017 education enrolled private grades 1 4 pop 3 persons                           | 2.092  |
| census housing units 2017 housing built 1970 to 1979 count housing units                               | 2.072  |
| census employment 2017 employment management of companies and enterprises pop 16 persons               | 1.855  |
| census employment 2017 employment construction pop 16 persons                                          | 1.756  |
| census employment 2017 employment taxi to work empl 16 persons                                         | 1.673  |
| census housing units 2017 housing structure with 3 4 units count housing units                         | 1.558  |
| census housing units 2017 housing vacant units for migrant workers count housing units                 | 1.365  |
| health children 2017 last health care professional visit more than 5 years count of households persons | 1.229  |
| census housing units 2017 housing vacant units rented not occupied count housing units                 | 1.114  |
| census housing units 2017 housing structure with 1 unit attached count housing units                   | 1.047  |
| expenditures food 2017 school books supplies equipment for day care nursery total amount               | 1.042  |
| census employment 2017 employment state government workers pop 16 persons                              | 0.647  |
| census housing units 2017 housing vacant units for rent count housing units                            | 0.497  |
| census housing units 2017 home heating fuel no fuel used count housing units                           | 0.414  |
| census demographics 2017 education enrolled public preprimary pop 3 persons                            | 0.188  |
| census housing units 2017 housing structure boat rv van other count housing units                      | 0.133  |
| census employment 2017 employment federal government workers pop 16 persons                            | -1.140 |

HH=Household

Fam=Family

Pop=Population

Non Fam=Non family

OT=Other

ER=Emergency room

RV=recreational vehicle

Equip=equipment

Misc.=miscellaneous

BCBS=Blue Cross Blue Shield

OOT=Out of town

RIHC=resource intensive healthcare
