# Supplementary material for: Can diverse population characteristics be leveraged in a machine learning pipeline to predict resource intensive healthcare utilization among hospital service areas?
Source: Springer Nature journal article supplement (doi:10.1186/s12913-022-08154-4), 2022-06-30
Supplement: MOESM13 [file 23224174]

## Additional File 13. Coefficient Output from Best Performing Machine Learning Model for log Inpatient Days

- Additional File 13
  - File format: PDF
  - File title: Coefficient Output from Best Performing Machine Learning Model for log Inpatient Days
  - File description: Long table, prediction model output for log inpatient days per capita

|                                                                                                      | Coefficient |
|------------------------------------------------------------------------------------------------------|-------------|
| Intercept                                                                                            | -1.435      |
| census employment 2017 employment public transportation to work empl 16 persons                      | 0.001       |
| census employment 2017 employment streetcar or trolley car to work empl 16 persons                   | 0.038       |
| census employment 2017 employment railroad to work empl 16 persons                                   | 0.003       |
| census employment 2017 employment taxi to work empl 16 persons                                       | 0.002       |
| census employment 2017 employment bicycle to work empl 16 persons                                    | -0.011      |
| census employment 2017 employment other transportation to work empl 16 persons                       | 0.004       |
| census employment 2017 employment travel time 15 29 min empl 16 persons                              | 0.003       |
| census employment 2017 employment travel time 30 59 min empl 16 persons                              | -0.001      |
| census employment 2017 employment potential pop 16 persons                                           | 0.023       |
| census employment 2017 employment unemployed female pop 16 persons                                   | 0.002       |
| census employment 2017 employment mining quarrying and oil and gas extraction pop 16 persons         | -0.002      |
| census employment 2017 employment construction pop 16 persons                                        | -0.005      |
| census employment 2017 employment manufacturing pop 16 persons                                       | -0.002      |
| census employment 2017 employment wholesale trade pop 16 persons                                     | 0.006       |
| census employment 2017 employment management of companies and enterprises pop 16 persons             | 0.027       |
| census employment 2017 employment administrative and support and waste mgt services pop 16 persons   | 0.001       |
| census employment 2017 employment health care and social assistance pop 16 persons                   | 0.012       |
| census employment 2017 employment arts entertainment and recreation pop 16 persons                   | 0.004       |
| census employment 2017 employment other services pop 16 persons                                      | -0.004      |
| census employment 2017 employment public administration pop 16 persons                               | -0.002      |
| census employment 2017 occupation service pop 16 persons                                             | -0.001      |
| census employment 2017 occupation farming fishing and forestry pop 16 persons                        | -0.001      |
| census employment 2017 employment private for profit wage and salary workers employee pop 16 persons | -0.001      |

|                                                                                                  |        |
|--------------------------------------------------------------------------------------------------|--------|
| census employment 2017 employment private for profit wage and salary workers self pop 16 persons | 0.009  |
| census employment 2017 employment private not for profit wage and salary workers pop 16 persons  | 0.001  |
| census employment 2017 employment local government workers pop 16 persons                        | 0.001  |
| census employment 2017 employment unpaid family workers pop 16 persons                           | 0.006  |
| census housing units 2017 home heating fuel fuel oil kerosene etc count housing units            | -0.001 |
| census housing units 2017 home heating fuel wood count housing units                             | -0.001 |
| census housing units 2017 home heating fuel solar energy count housing units                     | -0.007 |
| census housing units 2017 home heating fuel other fuel count housing units                       | 0.001  |
| census housing units 2017 home heating fuel no fuel used count housing units                     | 0.001  |
| census housing units 2017 housing vacant units for rent count housing units                      | 0.003  |
| census housing units 2017 housing vacant units rented not occupied count housing units           | -0.008 |
| census housing units 2017 housing vacant units for sale count housing units                      | -0.013 |
| census housing units 2017 housing vacant units sold not occupied count housing units             | -0.003 |
| census housing units 2017 housing vacant units for migrant workers count housing units           | -0.019 |
| census housing units 2017 housing vacant units vacant other count housing units                  | 0.001  |
| census housing units 2017 housing structure with 20 49 units count housing units                 | -0.001 |
| census housing units 2017 housing structure with 50 units count housing units                    | 0.001  |
| census housing units 2017 housing structure boat rv van other count housing units                | -0.022 |
| census housing units 2017 housing rent 750 999 count housing units                               | 0.001  |
| census housing units 2017 housing no cash rent count housing units                               | -0.006 |
| census housing units 2017 housing owner households valued less than 10000 count housing units    | 0.003  |
| census housing units 2017 housing owner households valued 10000 14999 count housing units        | 0.003  |
| census housing units 2017 housing owner households valued 20000 24999 count housing units        | -0.007 |
| census housing units 2017 housing owner households valued 25000 29999 count housing units        | -0.004 |
| census housing units 2017 housing owner households valued 30000 34999 count housing units        | 0.000  |
| census housing units 2017 housing owner households valued 35000 39999 count housing units        | -0.003 |
| census housing units 2017 housing owner households valued 50000 59999 count housing units        | 0.001  |
| census housing units 2017 housing owner households valued 250000 299999 count housing units      | -0.001 |
| census housing units 2017 housing owner households valued 750000 999999 count housing units      | -0.001 |
| census housing units 2017 housing built 1980 to 1989 count housing units                         | 0.001  |
| census housing units 2017 housing built 1950 to 1959 count housing units                         | 0.001  |
| census housing units 2017 housing year moved in 2000 to 2009 count housing units                 | -0.001 |
| census housing units 2017 housing year moved in 1970 to 1979 count housing units                 | 0.004  |
| census housing units 2017 housing year moved in 1969 or earlier count housing units              | 0.004  |

Variables with coefficient of 0 were not included

HH=Household

Fam=Family  
Pop=Population  
Non Fam=Non family  
OT=Other  
ER=Emergency room  
RV=recreational vehicle  
Equip=equipment  
Misc.=miscellaneous  
BCBS=Blue Cross Blue Shield  
OOT=Out of town  
RIHC=resource intensive healthcare
