# Supplementary material for: Can diverse population characteristics be leveraged in a machine learning pipeline to predict resource intensive healthcare utilization among hospital service areas?
Source: Springer Nature journal article supplement (doi:10.1186/s12913-022-08154-4), 2022-06-30
Supplement: MOESM14 [file 23224174]

## Additional File 14. Relative Influence of Variables from Best Performing Machine Learning Model for log Hospital Expenditures per Capita

- Additional File 14
  - File format: PDF
  - File title: Relative Influence of Variables from Best Performing Machine Learning Model for log Hospital Expenditures per Capita
  - File description: long table, prediction model output for log hospital expenditures per capita

|                                                                                                                                     | Relative Influence |
|-------------------------------------------------------------------------------------------------------------------------------------|--------------------|
| census demographics 2017 population urban persons                                                                                   | 18.520             |
| census demographics 2017 non families 6 person households                                                                           | 7.689              |
| census employment 2017 employment travel time less than 15 min empl 16 persons                                                      | 7.051              |
| census demographics 2017 non families 7 or more person households                                                                   | 6.595              |
| health children 2017 still have asthma count of households persons                                                                  | 4.387              |
| expenditures miscellaneous 2017 global positioning system devices total amount                                                      | 4.355              |
| census demographics 2017 head of household male households                                                                          | 4.322              |
| census employment 2017 employment local government workers pop 16 persons                                                           | 4.308              |
| census housing units 2017 housing median year moved in count year                                                                   | 4.208              |
| census employment 2017 employment agriculture forestry fishing and hunting pop 16 persons                                           | 3.116              |
| census demographics 2017 household income median                                                                                    | 2.092              |
| health children 2017 all persons with a usual place of health care some other place count of households persons                     | 1.929              |
| census demographics 2017 non family households female householder with people under 18 households                                   | 1.846              |
| census demographics 2017 education enrolled private kindergarten pop 3 persons                                                      | 1.656              |
| census housing units 2017 housing median year built count year                                                                      | 1.597              |
| census housing units 2017 housing built 2000 to 2009 count housing units                                                            | 1.429              |
| health children 2017 last health care professional visit more than 1 year but not more than 2 years ago count of households persons | 1.396              |
| census employment 2017 employment motorcycle to work empl 16 persons                                                                | 1.387              |
| census demographics 2017 non families 4 person households                                                                           | 1.311              |
| census employment 2017 employment retail trade pop 16 persons                                                                       | 1.040              |
| expenditures miscellaneous 2017 trailer and other attachable campers total amount                                                   | 0.989              |
| census demographics 2017 non family households male householder with people under 18 households                                     | 0.957              |
| health children 2017 children 2 17 years no unmet dental need count of households persons                                           | 0.915              |

|                                                                                                                                           |       |
|-------------------------------------------------------------------------------------------------------------------------------------------|-------|
| census employment 2017 employment health care and social assistance pop 16 persons                                                        | 0.911 |
| census employment 2017 employment utilities pop 16 persons                                                                                | 0.906 |
| census housing units 2017 housing vacant units rented not occupied count housing units                                                    | 0.904 |
| health children 2017 last health care professional visit more than 5 years count of households persons                                    | 0.892 |
| census housing units 2017 housing owner households valued 20000 24999 count housing units                                                 | 0.871 |
| census demographics 2017 population institutional group quarters persons                                                                  | 0.860 |
| health children 2017 last health care professional visit more than 2 years but less than 5 years ago count of households persons          | 0.830 |
| census employment 2017 employment private not for profit wage and salary workers pop 16 persons                                           | 0.794 |
| health adults 2017 stroke count of households persons                                                                                     | 0.777 |
| census demographics 2017 education enrolled public preprimary pop 3 persons                                                               | 0.754 |
| census housing units 2017 housing rent 1500 1999 count housing units                                                                      | 0.720 |
| health children 2017 all persons with a usual place of health care emergency room count of households persons                             | 0.662 |
| census demographics 2017 household income average                                                                                         | 0.624 |
| census demographics 2017 householder aged 85 years and over households                                                                    | 0.616 |
| census housing units 2017 housing structure with 2 units count housing units                                                              | 0.603 |
| expenditures miscellaneous 2017 termination fee for car truck lease total amount                                                          | 0.536 |
| census demographics 2017 two or more races head of households households                                                                  | 0.511 |
| census demographics 2017 households 1 person households                                                                                   | 0.469 |
| census housing units 2017 housing owner households valued 400000 499999 count housing units                                               | 0.376 |
| census employment 2017 employment transportation and warehousing pop 16 persons                                                           | 0.358 |
| census demographics 2017 education attainment professional degree pop 25 persons                                                          | 0.344 |
| health children 2017 number school days missed in past 12 months due to illness or injury aged 5 17 6 10 days count of households persons | 0.305 |
| census demographics 2017 asian households households                                                                                      | 0.301 |
| census demographics 2017 population male persons                                                                                          | 0.277 |
| census employment 2017 employment other transportation to work empl 16 persons                                                            | 0.262 |
| census demographics 2017 education enrolled private grades 5 8 pop 3 persons                                                              | 0.260 |
| census demographics 2017 families aged 55 to 64 years families                                                                            | 0.246 |
| census demographics 2017 non family households male householder with no people under 18 households                                        | 0.215 |
| census demographics 2017 householder aged 55 to 64 years households                                                                       | 0.209 |
| census demographics 2017 families 7 or more person families                                                                               | 0.192 |
| census employment 2017 employment walked to work empl 16 persons                                                                          | 0.165 |
| census demographics 2017 population median age years                                                                                      | 0.152 |

Variables with relative influence of 0 were not included

HH=Household  
Fam=Family  
Pop=Population  
Non Fam=Non family  
OT=Other  
ER=Emergency room  
RV=recreational vehicle  
Equip=equipment  
Misc.=miscellaneous  
BCBS=Blue Cross Blue Shield  
OOT=Out of town  
RIHC=resource intensive healthcare
