# Supplementary material for: Can diverse population characteristics be leveraged in a machine learning pipeline to predict resource intensive healthcare utilization among hospital service areas?
Source: Springer Nature journal article supplement (doi:10.1186/s12913-022-08154-4), 2022-06-30
Supplement: MOESM15 [file 23224174]

Additional File 15. Multivariable linear regression model of log  
Emergency Room visits per capita in Hospital Service Areas 2017  
(N=3,153, adjusted R<sup>2</sup> 0.312)

- Additional File 15
  - File format: PDF
  - File title: Multivariable linear regression model of log Emergency Room visits per capita in Hospital Service Areas 2017 (N=3,153, adjusted R<sup>2</sup> 0.312)
  - File description: Long table, model output for regression model for ER visits per capita

| <b>Variable (expressed as per capita or per capita percent)</b>                     | <b>Coefficient</b> | <b>Standard Error</b> | <b>Z Statistics</b> | <b>P Value</b> | <b>95% Lower</b> | <b>95% Upper</b> |
|-------------------------------------------------------------------------------------|--------------------|-----------------------|---------------------|----------------|------------------|------------------|
| (Intercept)                                                                         | -0.869             | 5.319                 | -0.163              | 0.870          | -11.294          | 9.557            |
| census demographics 2017 household income average                                   | 0.000              | 0.000                 | -0.597              | 0.551          | 0.000            | 0.000            |
| census demographics 2017 population speaks other language pop 5 persons             | -0.044             | 0.050                 | -0.884              | 0.377          | -0.142           | 0.054            |
| health adults 2017 worthlessness all or most of the time                            | -0.457             | 0.169                 | -2.708              | 0.007          | -0.788           | -0.126           |
| census demographics 2017 population citizenship foreign born not a citizen persons  | 0.001              | 0.001                 | 1.353               | 0.176          | -0.001           | 0.003            |
| census demographics 2017 veterans total persons                                     | 0.000              | 0.001                 | -0.736              | 0.462          | -0.002           | 0.001            |
| census demographics 2017 population institutional group quarters persons            | 0.000              | 0.000                 | 0.797               | 0.426          | 0.000            | 0.000            |
| census demographics 2017 population non institutional group quarters persons        | 0.305              | 0.240                 | 1.271               | 0.204          | -0.165           | 0.776            |
| census demographics 2017 householder aged 35 to 44 years households                 | -0.002             | 0.002                 | -0.797              | 0.426          | -0.006           | 0.003            |
| health adults 2017 last doctor visit more than 1 year but not more than 2 years ago | -0.273             | 0.135                 | -2.017              | 0.044          | -0.538           | -0.008           |
| census demographics 2017 households with 4 vehicles households                      | -0.001             | 0.001                 | -1.292              | 0.196          | -0.004           | 0.001            |
| census demographics 2017 education enrolled public preprimary pop 3 persons         | 0.001              | 0.001                 | 1.505               | 0.132          | 0.000            | 0.002            |
| census demographics 2017 education enrolled private preprimary pop 3 persons        | 0.002              | 0.001                 | 1.805               | 0.071          | 0.000            | 0.004            |
| census demographics 2017 education enrolled private kindergarten pop 3 persons      | -0.001             | 0.003                 | -0.242              | 0.809          | -0.006           | 0.004            |
| health adults 2017 stroke                                                           | -0.161             | 0.076                 | -2.109              | 0.035          | -0.311           | -0.011           |
| census demographics 2017 education enrolled private grades 5 8 pop 3 persons        | 0.001              | 0.001                 | 1.196               | 0.232          | -0.001           | 0.003            |
| census demographics 2017 education enrolled public grades 9 12 pop 3 persons        | -0.001             | 0.000                 | -1.675              | 0.094          | -0.001           | 0.000            |
| health children 2017 without a usual place of health care                           | -0.151             | 0.038                 | -3.918              | 0.000          | -0.226           | -0.075           |

|                                                                                                                        |        |       |        |       |        |        |
|------------------------------------------------------------------------------------------------------------------------|--------|-------|--------|-------|--------|--------|
| census demographics 2017 education enrolled private graduate or professional school pop 3 persons                      | 0.002  | 0.001 | 1.667  | 0.096 | 0.000  | 0.004  |
| census demographics 2017 education not enrolled in school pop 3 persons                                                | 0.000  | 0.000 | 0.428  | 0.668 | 0.000  | 0.000  |
| census demographics 2017 education attainment high school pop 25 persons 2                                             | 0.000  | 0.000 | 0.125  | 0.901 | 0.000  | 0.001  |
| census demographics 2017 education attainment professional degree pop 25 persons                                       | 0.003  | 0.002 | 1.695  | 0.090 | 0.000  | 0.006  |
| census demographics 2017 households with income less than 15000 households                                             | 0.000  | 0.003 | 0.027  | 0.978 | -0.006 | 0.006  |
| health children 2017 unmet medical need                                                                                | -0.125 | 0.043 | -2.907 | 0.004 | -0.209 | -0.041 |
| census demographics 2017 households 3 person households                                                                | 0.005  | 0.006 | 0.860  | 0.390 | -0.007 | 0.017  |
| census demographics 2017 families married with children under 18 families                                              | 0.001  | 0.001 | 1.776  | 0.076 | 0.000  | 0.002  |
| census demographics 2017 family head of household male households                                                      | 0.000  | 0.000 | 0.055  | 0.956 | -0.001 | 0.001  |
| health children 2017 children 3 to 17 learning disability                                                              | -0.060 | 0.030 | -2.015 | 0.044 | -0.118 | -0.002 |
| census demographics 2017 other families female householder no husband present with no children under 18 other families | 0.001  | 0.000 | 1.654  | 0.098 | 0.000  | 0.001  |
| census demographics 2017 non family households female householder with people under 18 households                      | 0.000  | 0.007 | 0.001  | 0.999 | -0.014 | 0.014  |
| census demographics 2017 population urban persons                                                                      | 0.000  | 0.000 | 0.053  | 0.958 | 0.000  | 0.000  |
| census demographics 2017 black population alone persons                                                                | -0.002 | 0.001 | -1.705 | 0.088 | -0.005 | 0.000  |
| census demographics 2017 asian population alone persons                                                                | 0.002  | 0.002 | 0.739  | 0.460 | -0.003 | 0.006  |
| health children 2017 number school days missed in past 12 months due to illness or injury aged 5 17 6 10 days          | -0.055 | 0.028 | -1.957 | 0.050 | -0.111 | 0.000  |
| census demographics 2017 other race population alone persons                                                           | -0.246 | 0.190 | -1.295 | 0.195 | -0.619 | 0.126  |
| census demographics 2017 two or more races population persons                                                          | 0.000  | 0.000 | -1.246 | 0.213 | 0.000  | 0.000  |
| census demographics 2017 asian households households                                                                   | -0.011 | 0.008 | -1.336 | 0.182 | -0.027 | 0.005  |
| census demographics 2017 american indian and alaska native head of households households                               | -0.006 | 0.003 | -1.703 | 0.089 | -0.013 | 0.001  |
| census demographics 2017 two or more races head of households households                                               | -0.006 | 0.003 | -1.890 | 0.059 | -0.012 | 0.000  |
| census demographics 2017 families 3 person families                                                                    | 0.000  | 0.002 | -0.277 | 0.781 | -0.004 | 0.003  |
| census demographics 2017 non families 5 person households                                                              | 0.001  | 0.004 | 0.127  | 0.899 | -0.008 | 0.009  |
| census demographics 2017 non families 7 or more person households                                                      | -0.018 | 0.009 | -1.980 | 0.048 | -0.036 | 0.000  |
| census demographics 2017 families aged under 25 years families                                                         | 0.000  | 0.001 | 0.357  | 0.721 | -0.002 | 0.003  |
| census demographics 2017 families aged 55 to 64 years families                                                         | 0.000  | 0.001 | 0.117  | 0.907 | -0.001 | 0.001  |
| census demographics 2017 non families aged under 25 years households                                                   | -0.001 | 0.001 | -1.129 | 0.259 | -0.002 | 0.001  |

|                                                                                                                            |        |       |        |       |        |        |
|----------------------------------------------------------------------------------------------------------------------------|--------|-------|--------|-------|--------|--------|
| census demographics 2017 non families aged 45 to 54 years households                                                       | 0.000  | 0.001 | 0.491  | 0.623 | -0.001 | 0.001  |
| census demographics 2017 non families aged 55 to 64 years households                                                       | -0.001 | 0.001 | -1.061 | 0.289 | -0.002 | 0.001  |
| census demographics 2017 non families aged 65 to 74 years households                                                       | 0.000  | 0.001 | -0.409 | 0.683 | -0.001 | 0.001  |
| census demographics 2017 non families aged 75 years and over households                                                    | 0.000  | 0.001 | 0.049  | 0.961 | -0.001 | 0.001  |
| census demographics 2017 family median size number persons                                                                 | 0.002  | 0.006 | 0.385  | 0.700 | -0.009 | 0.013  |
| census demographics 2017 households median size number persons                                                             | 0.002  | 0.005 | 0.484  | 0.628 | -0.007 | 0.012  |
| health adults 2017 full guidelines strengthening and aerobic combined met both muscle strengthening and aerobic guidelines | -0.033 | 0.048 | -0.685 | 0.494 | -0.128 | 0.062  |
| census employment 2017 employment potential                                                                                | -0.018 | 0.006 | -2.840 | 0.005 | -0.030 | -0.005 |
| health adults 2017 last dental visit more than 2 years ago but not more than 5 years ago                                   | 0.150  | 0.145 | 1.033  | 0.302 | -0.134 | 0.434  |
| health adults 2017 liver disease                                                                                           | -0.174 | 0.171 | -1.013 | 0.311 | -0.510 | 0.162  |
| health adults 2017 pain in face or jaw                                                                                     | 0.130  | 0.167 | 0.777  | 0.437 | -0.198 | 0.458  |
| census demographics 2017 education enrolled private grades 1 4 pop 3 persons                                               | -0.004 | 0.001 | -3.732 | 0.000 | -0.006 | -0.002 |
| census employment 2017 employment walked to work empl                                                                      | -0.004 | 0.001 | -3.736 | 0.000 | -0.006 | -0.002 |
| health adults 2017 all current smokers                                                                                     | -0.126 | 0.103 | -1.223 | 0.221 | -0.327 | 0.076  |
| health adults 2017 some day smokers                                                                                        | -0.021 | 0.168 | -0.127 | 0.899 | -0.350 | 0.307  |
| health adults 2017 alcohol current infrequent                                                                              | -0.085 | 0.060 | -1.415 | 0.157 | -0.202 | 0.033  |
| health adults 2017 hay fever                                                                                               | 0.220  | 0.131 | 1.684  | 0.092 | -0.036 | 0.476  |
| health adults 2017 without a usual place of health care                                                                    | 0.113  | 0.098 | 1.154  | 0.248 | -0.079 | 0.306  |
| health adults 2017 type some other place                                                                                   | -0.237 | 0.177 | -1.337 | 0.181 | -0.585 | 0.111  |
| expenditures home 2017 infants equipment                                                                                   | -0.004 | 0.001 | -2.817 | 0.005 | -0.006 | 0.001  |
| health adults 2017 last doctor visit more than 2 years but less than 5 years ago                                           | -0.113 | 0.166 | -0.682 | 0.495 | -0.439 | 0.212  |
| census employment 2017 employment agriculture forestry fishing and hunting                                                 | -0.002 | 0.001 | -2.711 | 0.007 | -0.004 | -0.001 |
| health children 2017 number school days missed in past 12 months due to illness or injury aged 5 17 1 2 days               | -0.024 | 0.025 | -0.968 | 0.333 | -0.074 | 0.025  |
| health children 2017 number school days missed in past 12 months due to illness or injury aged 5 17 3 5 days               | 0.049  | 0.029 | 1.685  | 0.092 | -0.008 | 0.106  |
| census housing units 2017 housing year moved in 1990 to 1999                                                               | -0.002 | 0.001 | -2.903 | 0.004 | -0.003 | -0.001 |
| health children 2017 number school days missed in past 12 months due to illness or injury aged 5 17 11 or more days        | -0.026 | 0.028 | -0.914 | 0.361 | -0.081 | 0.030  |
| health children 2017 number school days missed in past 12 months due to illness or injury aged 5 17 did not go to school   | -0.001 | 0.003 | -0.362 | 0.717 | -0.006 | 0.004  |

|                                                                                                                    |        |       |        |       |        |        |
|--------------------------------------------------------------------------------------------------------------------|--------|-------|--------|-------|--------|--------|
| health children 2017 emergency room visits in past 12 months for children under 18 one                             | 0.014  | 0.031 | 0.466  | 0.641 | -0.046 | 0.075  |
| health children 2017 emergency room visits in past 12 months for children under 18 two or more                     | -0.012 | 0.037 | -0.333 | 0.739 | -0.085 | 0.061  |
| health children 2017 children receiving special education or early intervention services                           | 0.061  | 0.037 | 1.662  | 0.097 | -0.011 | 0.133  |
| health children 2017 hay fever                                                                                     | -0.024 | 0.038 | -0.642 | 0.521 | -0.098 | 0.050  |
| health children 2017 respiratory allergies                                                                         | -0.005 | 0.036 | -0.140 | 0.889 | -0.076 | 0.066  |
| health children 2017 food allergies                                                                                | 0.077  | 0.040 | 1.937  | 0.053 | -0.001 | 0.155  |
| health children 2017 skin allergies                                                                                | -0.034 | 0.028 | -1.204 | 0.229 | -0.089 | 0.021  |
| census housing units 2017 housing structure with 10 19 units                                                       | -0.001 | 0.001 | -2.129 | 0.033 | -0.003 | 0.000  |
| census employment 2017 employment travel time 30 59 min empl                                                       | -0.001 | 0.000 | -4.340 | 0.000 | -0.002 | -0.001 |
| health children 2017 very good health status respondent assessed                                                   | 0.014  | 0.034 | 0.403  | 0.687 | -0.054 | 0.081  |
| health children 2017 good health status respondent assessed                                                        | 0.053  | 0.030 | 1.730  | 0.084 | -0.007 | 0.112  |
| health children 2017 fair of poor health status respondent assessed                                                | -0.054 | 0.039 | -1.376 | 0.169 | -0.132 | 0.023  |
| census demographics 2017 families married families                                                                 | -0.001 | 0.000 | -2.082 | 0.037 | -0.002 | 0.000  |
| health children 2017 with a usual place of health care                                                             | 0.003  | 0.035 | 0.096  | 0.924 | -0.066 | 0.072  |
| health children 2017 with a usual place of health care clinic                                                      | -0.002 | 0.016 | -0.093 | 0.926 | -0.033 | 0.030  |
| census housing units 2017 housing structure with 1 unit attached                                                   | -0.001 | 0.000 | -2.467 | 0.014 | -0.001 | 0.000  |
| health children 2017 with a usual place of health care hospital outpatient                                         | -0.050 | 0.039 | -1.305 | 0.192 | -0.126 | 0.025  |
| health children 2017 with a usual place of health care some other place                                            | -0.052 | 0.040 | -1.314 | 0.189 | -0.130 | 0.026  |
| health children 2017 last health care professional visit 6 months or less                                          | -0.055 | 0.035 | -1.573 | 0.116 | -0.124 | 0.014  |
| census housing units 2017 housing built 2000 to 2009                                                               | -0.001 | 0.000 | -1.989 | 0.047 | -0.001 | 0.000  |
| health children 2017 last health care professional visit more than 1 year but not more than 2 years ago            | 0.053  | 0.040 | 1.331  | 0.183 | -0.025 | 0.131  |
| health children 2017 last health care professional visit more than 2 years but less than 5 years ago               | -0.068 | 0.040 | -1.687 | 0.092 | -0.147 | 0.011  |
| health children 2017 last health care professional visit more than 5 years                                         | -0.042 | 0.039 | -1.088 | 0.277 | -0.119 | 0.034  |
| census housing units 2017 housing median rent count census housing units 2017 housing median year built count year | 0.000  | 0.000 | -2.070 | 0.039 | 0.000  | 0.000  |
| health children 2017 delayed care due to cost                                                                      | 0.043  | 0.037 | 1.162  | 0.245 | -0.029 | 0.114  |
| health children 2017 children 2 17 years yes unmet dental need                                                     | 0.036  | 0.035 | 1.038  | 0.299 | -0.032 | 0.103  |
| health children 2017 children 2 17 years no unmet dental need                                                      | 0.043  | 0.028 | 1.521  | 0.128 | -0.012 | 0.099  |
| health children 2017 children 2 17 years less than 6 months since last dental visit                                | -0.006 | 0.025 | -0.230 | 0.818 | -0.054 | 0.043  |

|                                                                                                                  |        |       |        |       |        |       |
|------------------------------------------------------------------------------------------------------------------|--------|-------|--------|-------|--------|-------|
| health children 2017 children 2 17 years more than 6 months but less than 1 year since last dental visit         | 0.025  | 0.032 | 0.783  | 0.434 | -0.037 | 0.087 |
| health children 2017 children 2 17 years more than 1 year but not more than 2 years since last dental visit      | 0.006  | 0.032 | 0.197  | 0.844 | -0.056 | 0.069 |
| health children 2017 children 2 17 years more than 2 years but not more than 5 years ago since last dental visit | -0.051 | 0.034 | -1.496 | 0.135 | -0.118 | 0.016 |
| census housing units 2017 housing median rent count                                                              | 0.000  | 0.000 | 2.478  | 0.013 | 0.000  | 0.000 |
| census housing units 2017 housing built 1950 to 1959                                                             | 0.001  | 0.000 | 2.295  | 0.022 | 0.000  | 0.001 |
| census employment 2017 employment railroad to work empl                                                          | -0.002 | 0.002 | -1.170 | 0.242 | -0.006 | 0.001 |
| census employment 2017 employment taxi to work empl                                                              | 0.008  | 0.007 | 1.074  | 0.283 | -0.006 | 0.022 |
| census employment 2017 employment motorcycle to work empl                                                        | 0.007  | 0.007 | 1.110  | 0.267 | -0.006 | 0.020 |
| census employment 2017 employment bicycle to work empl                                                           | -0.003 | 0.002 | -1.143 | 0.253 | -0.008 | 0.002 |
| census housing units 2017 housing built 1990 to 1999                                                             | 0.001  | 0.000 | 3.351  | 0.001 | 0.000  | 0.002 |
| census employment 2017 employment other transportation to work empl                                              | -0.001 | 0.002 | -0.616 | 0.538 | -0.005 | 0.003 |
| census employment 2017 employment work at home empl                                                              | -0.001 | 0.001 | -0.889 | 0.374 | -0.003 | 0.001 |
| census employment 2017 employment travel time 15 29 min empl                                                     | 0.000  | 0.000 | -0.132 | 0.895 | -0.001 | 0.001 |
| census housing units 2017 housing rent 750 999                                                                   | 0.001  | 0.001 | 2.058  | 0.040 | 0.000  | 0.002 |
| census employment 2017 employment travel time 90 min empl                                                        | -0.001 | 0.001 | -0.543 | 0.587 | -0.003 | 0.002 |
| census demographics 2017 education enrolled public graduate or professional school pop 3 persons                 | 0.002  | 0.001 | 2.258  | 0.024 | 0.000  | 0.003 |
| census employment 2017 employment civilian males                                                                 | -0.001 | 0.001 | -1.052 | 0.293 | -0.003 | 0.001 |
| census employment 2017 employment armed forces male                                                              | -0.001 | 0.001 | -0.945 | 0.345 | -0.003 | 0.001 |
| census employment 2017 employment unemployed males                                                               | 0.013  | 0.011 | 1.217  | 0.224 | -0.008 | 0.034 |
| census employment 2017 employment unemployed female                                                              | -0.002 | 0.012 | -0.192 | 0.848 | -0.027 | 0.022 |
| census employment 2017 employment not in the labor force female                                                  | 0.001  | 0.001 | 0.826  | 0.409 | -0.001 | 0.002 |
| census employment 2017 employment car truck van to work carpool empl                                             | 0.002  | 0.001 | 2.748  | 0.006 | 0.001  | 0.003 |
| census employment 2017 employment construction                                                                   | 0.000  | 0.001 | -0.096 | 0.924 | -0.002 | 0.002 |
| census employment 2017 employment real estate and rental and leasing                                             | 0.005  | 0.003 | 1.696  | 0.090 | -0.001 | 0.010 |
| census employment 2017 employment management of companies and enterprises                                        | -0.010 | 0.016 | -0.649 | 0.516 | -0.041 | 0.021 |
| census employment 2017 employment administrative and support and waste mgt services                              | 0.003  | 0.002 | 1.533  | 0.125 | -0.001 | 0.006 |
| expenditures food 2017 food or board at school                                                                   | 0.002  | 0.001 | 2.162  | 0.031 | 0.000  | 0.004 |
| census employment 2017 employment accommodation and food services                                                | 0.002  | 0.001 | 1.616  | 0.106 | 0.000  | 0.004 |

|                                                                                          |        |       |        |       |        |       |
|------------------------------------------------------------------------------------------|--------|-------|--------|-------|--------|-------|
| census employment 2017 employment public administration                                  | -0.002 | 0.001 | -1.773 | 0.076 | -0.004 | 0.000 |
| census employment 2017 occupation professional and related                               | 0.000  | 0.001 | 0.396  | 0.692 | -0.001 | 0.002 |
| census employment 2017 occupation service                                                | -0.001 | 0.001 | -0.896 | 0.370 | -0.002 | 0.001 |
| census employment 2017 occupation construction extraction and maintenance                | -0.001 | 0.001 | -1.482 | 0.138 | -0.003 | 0.000 |
| census employment 2017 employment blue collar                                            | 0.000  | 0.001 | -0.110 | 0.912 | -0.001 | 0.001 |
| census employment 2017 employment private for profit wage and salary workers self        | -0.002 | 0.001 | -1.470 | 0.142 | -0.005 | 0.001 |
| census employment 2017 employment private not for profit wage and salary workers         | 0.002  | 0.001 | 2.586  | 0.010 | 0.001  | 0.004 |
| census employment 2017 employment local government workers                               | 0.001  | 0.001 | 1.372  | 0.170 | -0.001 | 0.003 |
| census employment 2017 employment state government workers                               | 0.000  | 0.001 | -0.035 | 0.972 | -0.002 | 0.002 |
| census demographics 2017 households with no vehicles households                          | 0.002  | 0.001 | 2.416  | 0.016 | 0.000  | 0.004 |
| census employment 2017 employment self employed workers in own not incorporated business | -0.001 | 0.001 | -0.829 | 0.407 | -0.003 | 0.001 |
| census employment 2017 employment unpaid family workers                                  | -0.003 | 0.005 | -0.506 | 0.613 | -0.013 | 0.008 |
| census employment 2017 employment health care and social assistance                      | 0.003  | 0.001 | 3.282  | 0.001 | 0.001  | 0.004 |
| census housing units 2017 home heating fuel utility gas                                  | 0.000  | 0.000 | -1.107 | 0.268 | 0.000  | 0.000 |
| census housing units 2017 home heating fuel wood                                         | 0.000  | 0.000 | 1.099  | 0.272 | 0.000  | 0.001 |
| census housing units 2017 home heating fuel no fuel used                                 | 0.000  | 0.000 | -0.740 | 0.459 | -0.001 | 0.001 |
| census housing units 2017 housing vacant units for rent                                  | -0.001 | 0.001 | -1.063 | 0.288 | -0.003 | 0.001 |
| census housing units 2017 housing vacant units rented not occupied                       | 0.001  | 0.010 | 0.077  | 0.939 | -0.018 | 0.020 |
| census housing units 2017 housing vacant units for migrant workers                       | 0.010  | 0.008 | 1.266  | 0.206 | -0.006 | 0.026 |
| expenditures home 2017 boys uniforms and active sportswear                               | 0.003  | 0.001 | 2.216  | 0.027 | 0.000  | 0.006 |
| census housing units 2017 housing structure with 2 units                                 | -0.001 | 0.001 | -1.649 | 0.099 | -0.002 | 0.000 |
| census housing units 2017 housing structure with 3 4 units                               | 0.001  | 0.001 | 0.888  | 0.375 | -0.001 | 0.002 |
| census housing units 2017 housing structure with 5 9 units                               | -0.001 | 0.001 | -1.562 | 0.118 | -0.002 | 0.000 |
| census employment 2017 employment federal government workers                             | 0.004  | 0.001 | 3.045  | 0.002 | 0.001  | 0.006 |
| census housing units 2017 housing structure with 50 units                                | 0.001  | 0.001 | 0.831  | 0.406 | -0.001 | 0.002 |
| census housing units 2017 housing structure boat rv van other                            | -0.002 | 0.005 | -0.425 | 0.671 | -0.011 | 0.007 |
| census housing units 2017 housing rent less than 250                                     | 0.000  | 0.001 | 0.085  | 0.933 | -0.001 | 0.002 |
| census housing units 2017 housing rent 500 749                                           | 0.001  | 0.000 | 1.218  | 0.223 | 0.000  | 0.001 |
| census demographics 2017 american indian and alaska native population alone persons      | 0.004  | 0.002 | 2.584  | 0.010 | 0.001  | 0.007 |

|                                                                                                                                  |        |       |        |       |        |       |
|----------------------------------------------------------------------------------------------------------------------------------|--------|-------|--------|-------|--------|-------|
| census housing units 2017 housing rent 1250 1499                                                                                 | -0.001 | 0.001 | -0.839 | 0.402 | -0.004 | 0.002 |
| census housing units 2017 housing rent 1500 1999                                                                                 | 0.000  | 0.002 | -0.005 | 0.996 | -0.003 | 0.003 |
| census housing units 2017 housing owner households valued less than 10000                                                        | -0.001 | 0.001 | -0.973 | 0.331 | -0.004 | 0.001 |
| census housing units 2017 housing owner households valued 20000 24999                                                            | -0.001 | 0.002 | -0.934 | 0.350 | -0.005 | 0.002 |
| census housing units 2017 housing owner households valued 25000 29999                                                            | -0.003 | 0.002 | -1.768 | 0.077 | -0.006 | 0.000 |
| census housing units 2017 housing owner households valued 40000 49999                                                            | 0.000  | 0.001 | -0.398 | 0.690 | -0.003 | 0.002 |
| census housing units 2017 housing owner households valued 60000 69999                                                            | 0.001  | 0.001 | 0.713  | 0.476 | -0.001 | 0.002 |
| census housing units 2017 housing owner households valued 80000 89999                                                            | 0.001  | 0.001 | 1.303  | 0.193 | -0.001 | 0.003 |
| census housing units 2017 housing owner households valued 90000 99999                                                            | 0.000  | 0.001 | 0.315  | 0.753 | -0.002 | 0.002 |
| census housing units 2017 housing owner households valued 150000 174999                                                          | 0.001  | 0.001 | 1.923  | 0.055 | 0.000  | 0.002 |
| census housing units 2017 housing owner households valued more than 1000000                                                      | -0.001 | 0.001 | -0.847 | 0.397 | -0.002 | 0.001 |
| census demographics 2017 households with income 15000 to 24999 households                                                        | 0.011  | 0.005 | 2.379  | 0.017 | 0.002  | 0.021 |
| expenditures home 2017 boys hosiery                                                                                              | 0.013  | 0.005 | 2.487  | 0.013 | 0.003  | 0.023 |
| census housing units 2017 housing built 1980 to 1989                                                                             | 0.000  | 0.000 | 0.551  | 0.581 | 0.000  | 0.001 |
| census housing units 2017 housing built 1970 to 1979                                                                             | -0.001 | 0.000 | -1.851 | 0.064 | -0.001 | 0.000 |
| health children 2017 children 2 17 years more than 5 years since last dental visit                                               | 0.059  | 0.024 | 2.450  | 0.014 | 0.012  | 0.105 |
| census housing units 2017 housing built 1940 to 1949                                                                             | 0.001  | 0.001 | 1.443  | 0.149 | 0.000  | 0.002 |
| census housing units 2017 housing year moved in 2000 to 2009                                                                     | 0.000  | 0.001 | 0.641  | 0.521 | -0.001 | 0.001 |
| health children 2017 prescription medication taken regularly for at least 3 months                                               | 0.071  | 0.033 | 2.161  | 0.031 | 0.007  | 0.136 |
| census housing units 2017 housing year moved in 1970 to 1979                                                                     | 0.000  | 0.001 | 0.366  | 0.714 | -0.001 | 0.002 |
| census housing units 2017 housing renter occupied                                                                                | 0.000  | 0.000 | 0.204  | 0.838 | -0.001 | 0.001 |
| census housing units 2017 housing owner households with mortgage any                                                             | 0.000  | 0.000 | -0.693 | 0.488 | -0.001 | 0.000 |
| census housing units 2017 housing median year moved in count year census housing units 2017 housing median year built count year | 0.000  | 0.000 | 1.754  | 0.080 | 0.000  | 0.000 |
| health children 2017 with a usual place of health care emergency room                                                            | 0.078  | 0.039 | 1.984  | 0.047 | 0.001  | 0.154 |
| expenditures food 2017 snacks and nonalcoholic beverages at full service restaurants                                             | 0.001  | 0.001 | 0.778  | 0.436 | -0.001 | 0.002 |
| health children 2017 last health care professional visit more than six months but less than 1 year                               | 0.089  | 0.037 | 2.373  | 0.018 | 0.015  | 0.162 |
| expenditures food 2017 college tuition                                                                                           | 0.000  | 0.000 | -0.913 | 0.361 | 0.000  | 0.000 |
| expenditures food 2017 school books supplies equipment for college                                                               | 0.000  | 0.000 | -0.150 | 0.881 | -0.001 | 0.001 |

|                                                                                         |        |       |        |       |        |       |
|-----------------------------------------------------------------------------------------|--------|-------|--------|-------|--------|-------|
| expenditures food 2017 school books supplies equipment for day care nursery             | -0.026 | 0.049 | -0.522 | 0.602 | -0.123 | 0.071 |
| expenditures food 2017 bread and cracker products                                       | -0.008 | 0.008 | -1.023 | 0.306 | -0.024 | 0.008 |
| expenditures food 2017 cereals and cereal products                                      | 0.000  | 0.000 | -0.175 | 0.861 | 0.000  | 0.000 |
| census demographics 2017 population citizenship native persons                          | 0.149  | 0.067 | 2.232  | 0.026 | 0.018  | 0.280 |
| expenditures home 2017 mens nightwear                                                   | -0.014 | 0.026 | -0.561 | 0.575 | -0.065 | 0.036 |
| health adults 2017 last dental visit more than 1 year but not more than 2 years ago     | 0.175  | 0.087 | 2.021  | 0.043 | 0.005  | 0.345 |
| expenditures home 2017 ground rent                                                      | 0.001  | 0.000 | 1.564  | 0.118 | 0.000  | 0.001 |
| expenditures home 2017 computer installation                                            | -0.027 | 0.064 | -0.432 | 0.666 | -0.152 | 0.097 |
| expenditures home 2017 applications games ringtones for handheld devices                | 0.025  | 0.026 | 0.956  | 0.339 | -0.026 | 0.076 |
| expenditures home 2017 repair of tv radio and sound equipment                           | -0.023 | 0.038 | -0.612 | 0.540 | -0.098 | 0.052 |
| health adults 2017 last doctor visit never                                              | 0.659  | 0.192 | 3.441  | 0.001 | 0.284  | 1.034 |
| expenditures home 2017 girls uniforms                                                   | -0.030 | 0.024 | -1.223 | 0.221 | -0.077 | 0.018 |
| expenditures home 2017 infant coat jacket snowsuit                                      | 0.087  | 0.066 | 1.324  | 0.186 | -0.042 | 0.216 |
| expenditures home 2017 infant nightwear loungewear                                      | 0.007  | 0.009 | 0.802  | 0.422 | -0.010 | 0.025 |
| expenditures miscellaneous 2017 day care centers nursery and preschools                 | -0.001 | 0.001 | -0.880 | 0.379 | -0.002 | 0.001 |
| expenditures miscellaneous 2017 shoe repair and other shoe service                      | 0.010  | 0.087 | 0.110  | 0.913 | -0.161 | 0.180 |
| expenditures miscellaneous 2017 adult diapers                                           | -0.102 | 0.074 | -1.376 | 0.169 | -0.247 | 0.043 |
| expenditures miscellaneous 2017 rental of medical equipment                             | -0.118 | 0.117 | -1.012 | 0.311 | -0.347 | 0.111 |
| expenditures miscellaneous 2017 rental of supportive convalescent medical equipment     | -0.136 | 0.141 | -0.961 | 0.337 | -0.413 | 0.141 |
| expenditures miscellaneous 2017 photographic equipment                                  | 0.019  | 0.013 | 1.468  | 0.142 | -0.006 | 0.045 |
| expenditures miscellaneous 2017 gift to non cu members of stocks bonds and mutual funds | 0.001  | 0.002 | 0.386  | 0.699 | -0.004 | 0.005 |

HH=Household  
 Fam=Family  
 Pop=Population  
 Non Fam=Non family  
 OT=Other  
 ER=Emergency room  
 RV=recreational vehicle  
 Equip=equipment  
 Misc.=miscellaneous  
 BCBS=Blue Cross Blue Shield  
 OOT=Out of town  
 RIHC=resource intensive healthcare
