# Supplementary material for: Can diverse population characteristics be leveraged in a machine learning pipeline to predict resource intensive healthcare utilization among hospital service areas?
Source: Springer Nature journal article supplement (doi:10.1186/s12913-022-08154-4), 2022-06-30
Supplement: MOESM16 [file 23224174]

## Additional File 16. Multiple linear regression of log Inpatient Days per capita in Hospital Service Areas (N=3,174, Adjusted R<sup>2</sup> 0.329)

- Additional File 16
  - File format: PDF
  - File title: Multiple linear regression of log Inpatient Days per capita in Hospital Service Areas (N=3,174, Adjusted R<sup>2</sup> 0.329)
  - File description: Long table, model output for regression model for inpatient days per capita

| <b>Variables (expressed as per capita or per capita percent)</b>                                     | <b>Coefficient</b> | <b>Standard Error</b> | <b>Z Statistic</b> | <b>P Value</b> | <b>95% Lower</b> | <b>95% Upper</b> |
|------------------------------------------------------------------------------------------------------|--------------------|-----------------------|--------------------|----------------|------------------|------------------|
| health children 2017 food allergies                                                                  | -0.320             | 0.063                 | -5.083             | 0.000          | -0.444           | -0.197           |
| census demographics 2017 population speaks other language pop 5 persons                              | -0.218             | 0.089                 | -2.460             | 0.014          | -0.392           | -0.044           |
| census demographics 2017 population institutional group quarters persons                             | 0.000              | 0.000                 | -1.378             | 0.168          | 0.000            | 0.000            |
| census demographics 2017 householder aged 45 to 54 years households                                  | 0.008              | 0.009                 | 0.956              | 0.339          | -0.009           | 0.025            |
| census demographics 2017 householder aged 85 years and over households                               | -0.013             | 0.007                 | -1.768             | 0.077          | -0.026           | 0.001            |
| census demographics 2017 households with no vehicles households                                      | 0.002              | 0.002                 | 0.863              | 0.388          | -0.002           | 0.006            |
| census demographics 2017 households with 4 vehicles households                                       | 0.003              | 0.002                 | 1.498              | 0.134          | -0.001           | 0.007            |
| census demographics 2017 education enrolled public or private school pop 3 persons                   | 0.000              | 0.001                 | -0.603             | 0.547          | -0.002           | 0.001            |
| census demographics 2017 education enrolled public preprimary pop 3 persons                          | -0.002             | 0.001                 | -1.765             | 0.078          | -0.005           | 0.000            |
| census demographics 2017 education enrolled public kindergarten pop 3 persons                        | 0.002              | 0.001                 | 1.466              | 0.143          | -0.001           | 0.005            |
| census demographics 2017 education enrolled private kindergarten pop 3 persons                       | 0.002              | 0.005                 | 0.443              | 0.658          | -0.007           | 0.011            |
| health children 2017 last health care professional visit more than 2 years but less than 5 years ago | -0.215             | 0.071                 | -3.015             | 0.003          | -0.356           | -0.075           |
| census demographics 2017 education enrolled private grades 1 4 pop 3 persons                         | -0.004             | 0.002                 | -1.793             | 0.073          | -0.008           | 0.000            |
| census demographics 2017 education enrolled public grades 5 8 pop 3 persons                          | 0.001              | 0.001                 | 0.795              | 0.427          | -0.001           | 0.002            |
| census demographics 2017 education enrolled public grades 9 12 pop 3 persons                         | 0.000              | 0.001                 | 0.226              | 0.821          | -0.001           | 0.002            |
| census demographics 2017 education enrolled private grades 9 12 pop 3 persons                        | 0.002              | 0.002                 | 0.843              | 0.399          | -0.002           | 0.005            |
| census demographics 2017 education enrolled public undergraduate college pop 3 persons               | 0.000              | 0.001                 | 0.290              | 0.772          | -0.001           | 0.001            |
| census demographics 2017 education enrolled public graduate or professional school pop 3 persons     | 0.002              | 0.002                 | 1.583              | 0.113          | -0.001           | 0.006            |
| census demographics 2017 education not enrolled in school pop 3 persons                              | 0.000              | 0.000                 | -0.068             | 0.946          | 0.000            | 0.000            |

|                                                                                                                                      |        |       |        |       |        |        |
|--------------------------------------------------------------------------------------------------------------------------------------|--------|-------|--------|-------|--------|--------|
| census demographics 2017 education attainment high school pop 25 persons 2                                                           | -0.001 | 0.001 | -1.862 | 0.063 | -0.002 | 0.000  |
| census demographics 2017 education attainment some college pop 25 persons                                                            | 0.000  | 0.001 | -0.691 | 0.490 | -0.002 | 0.001  |
| census demographics 2017 population in poverty total persons                                                                         | -0.001 | 0.001 | -1.067 | 0.286 | -0.002 | 0.001  |
| census demographics 2017 education attainment associate s degree pop 25 persons                                                      | 0.000  | 0.001 | -0.026 | 0.979 | -0.002 | 0.002  |
| health children 2017 last health care professional visit 6 months or less                                                            | -0.204 | 0.054 | -3.792 | 0.000 | -0.310 | -0.099 |
| census demographics 2017 education attainment doctorate degree pop 25 persons                                                        | 0.793  | 1.019 | 0.778  | 0.436 | -1.205 | 2.791  |
| census demographics 2017 households with income 15000 to 24999 households                                                            | 0.005  | 0.009 | 0.577  | 0.564 | -0.012 | 0.022  |
| census demographics 2017 households with income 25000 to 34999 households                                                            | -0.014 | 0.010 | -1.419 | 0.156 | -0.034 | 0.005  |
| census demographics 2017 households with income 50000 to 74999 households                                                            | 0.017  | 0.012 | 1.452  | 0.147 | -0.006 | 0.040  |
| census demographics 2017 households with income 75000 to 99999 households                                                            | -0.010 | 0.008 | -1.209 | 0.227 | -0.026 | 0.006  |
| census demographics 2017 households with income 100000 to 124999 households                                                          | 0.010  | 0.014 | 0.707  | 0.480 | -0.017 | 0.037  |
| census demographics 2017 households with income 125000 to 149999 households                                                          | 0.008  | 0.014 | 0.580  | 0.562 | -0.019 | 0.035  |
| health children 2017 fair of poor health status respondent assessed                                                                  | -0.171 | 0.066 | -2.593 | 0.010 | -0.300 | -0.042 |
| census demographics 2017 family head of household male households                                                                    | -0.001 | 0.001 | -1.538 | 0.124 | -0.003 | 0.000  |
| census demographics 2017 population non institutional group quarters persons census demographics 2017 household average size persons | -0.046 | 0.018 | -2.600 | 0.009 | -0.080 | -0.011 |
| census demographics 2017 other families male householder no wife present with children under 18 other families                       | -0.001 | 0.001 | -1.953 | 0.051 | -0.003 | 0.000  |
| census demographics 2017 other families male householder no wife present with no children under 18 other families                    | 0.001  | 0.001 | 1.012  | 0.312 | -0.001 | 0.003  |
| census demographics 2017 other families female householder no husband present with no children under 18 other families               | 0.001  | 0.001 | 0.742  | 0.458 | -0.001 | 0.002  |
| expenditures home 2017 sewing machines                                                                                               | -0.040 | 0.012 | -3.221 | 0.001 | -0.065 | -0.016 |
| expenditures home 2017 girls underwear and sleepwear                                                                                 | -0.035 | 0.015 | -2.374 | 0.018 | -0.065 | -0.006 |
| census demographics 2017 non family households female householder with people under 18 households                                    | 0.008  | 0.013 | 0.570  | 0.569 | -0.018 | 0.034  |
| census demographics 2017 population urban persons                                                                                    | 0.000  | 0.000 | 0.045  | 0.964 | 0.000  | 0.000  |
| census demographics 2017 population male persons                                                                                     | 0.002  | 0.003 | 0.816  | 0.415 | -0.003 | 0.007  |
| census demographics 2017 black population alone persons                                                                              | -0.004 | 0.002 | -1.679 | 0.093 | -0.008 | 0.001  |
| census housing units 2017 housing structure boat rv van other                                                                        | -0.026 | 0.009 | -2.930 | 0.003 | -0.043 | -0.009 |
| census demographics 2017 other race population alone persons                                                                         | -0.308 | 0.358 | -0.859 | 0.390 | -1.011 | 0.395  |

|                                                                                                                                       |        |       |        |       |        |        |
|---------------------------------------------------------------------------------------------------------------------------------------|--------|-------|--------|-------|--------|--------|
| census demographics 2017 two or more races head of households households                                                              | 0.007  | 0.006 | 1.140  | 0.254 | -0.005 | 0.018  |
| census demographics 2017 families 6 person families                                                                                   | -0.021 | 0.012 | -1.748 | 0.081 | -0.044 | 0.003  |
| census demographics 2017 families 7 or more person families                                                                           | 0.002  | 0.003 | 0.694  | 0.488 | -0.004 | 0.007  |
| census demographics 2017 non families 1 person households                                                                             | 0.001  | 0.002 | 0.419  | 0.675 | -0.003 | 0.004  |
| census demographics 2017 non families 2 person households                                                                             | 0.001  | 0.002 | 0.401  | 0.689 | -0.003 | 0.005  |
| expenditures food 2017 frozen fruits and fruit juices                                                                                 | -0.025 | 0.011 | -2.303 | 0.021 | -0.047 | -0.004 |
| census demographics 2017 non families 5 person households                                                                             | -0.014 | 0.010 | -1.361 | 0.174 | -0.034 | 0.006  |
| census demographics 2017 non families 7 or more person households                                                                     | 0.008  | 0.018 | 0.480  | 0.631 | -0.026 | 0.043  |
| census demographics 2017 families aged under 25 years families                                                                        | -0.003 | 0.004 | -0.726 | 0.468 | -0.010 | 0.005  |
| census demographics 2017 families aged 25 to 34 years families                                                                        | 0.001  | 0.003 | 0.264  | 0.792 | -0.005 | 0.006  |
| census demographics 2017 families aged 35 to 44 years families                                                                        | 0.004  | 0.003 | 1.354  | 0.176 | -0.002 | 0.010  |
| census demographics 2017 families aged 55 to 64 years families                                                                        | -0.004 | 0.004 | -1.199 | 0.231 | -0.011 | 0.003  |
| census demographics 2017 families aged 65 to 74 years families                                                                        | -0.002 | 0.003 | -0.714 | 0.475 | -0.007 | 0.003  |
| census demographics 2017 non families aged 25 to 34 years households                                                                  | -0.001 | 0.002 | -0.818 | 0.413 | -0.004 | 0.002  |
| expenditures food 2017 school books supplies equipment for elementary high school                                                     | -0.015 | 0.007 | -2.155 | 0.031 | -0.029 | -0.001 |
| census demographics 2017 non families aged 45 to 54 years households                                                                  | -0.001 | 0.001 | -0.657 | 0.511 | -0.004 | 0.002  |
| census demographics 2017 non family households male householder with people under 18 households                                       | -0.015 | 0.006 | -2.583 | 0.010 | -0.026 | -0.004 |
| census demographics 2017 population males never married pop 15 persons                                                                | 0.000  | 0.000 | 0.850  | 0.395 | 0.000  | 0.000  |
| census demographics 2017 householder median age years                                                                                 | -0.002 | 0.002 | -1.161 | 0.246 | -0.006 | 0.002  |
| census demographics 2017 families median age years                                                                                    | 0.001  | 0.002 | 0.524  | 0.600 | -0.003 | 0.005  |
| census demographics 2017 family median size number persons                                                                            | -0.017 | 0.011 | -1.529 | 0.126 | -0.039 | 0.005  |
| census demographics 2017 households median size number persons                                                                        | -0.004 | 0.010 | -0.460 | 0.645 | -0.023 | 0.014  |
| census housing units 2017 housing vacant units sold not occupied                                                                      | -0.014 | 0.006 | -2.194 | 0.028 | -0.027 | -0.002 |
| census housing units 2017 housing vacant units for sale                                                                               | -0.013 | 0.004 | -3.015 | 0.003 | -0.021 | -0.004 |
| census demographics 2017 population density persons per sq mile census demographics 2017 household average size persons               | 0.000  | 0.000 | 1.051  | 0.293 | 0.000  | 0.000  |
| census demographics 2017 education attainment doctorate degree pop 25 persons census demographics 2017 household average size persons | 0.049  | 0.054 | 0.895  | 0.371 | -0.058 | 0.155  |
| census demographics 2017 family head of household female households census demographics 2017 household average size persons           | 0.000  | 0.000 | -1.603 | 0.109 | 0.000  | 0.000  |

|                                                                                                                                                                        |        |       |        |       |        |        |
|------------------------------------------------------------------------------------------------------------------------------------------------------------------------|--------|-------|--------|-------|--------|--------|
| census demographics 2017 other families male householder no wife present with children under 18 other families census demographics 2017 household average size persons | 0.000  | 0.000 | 0.894  | 0.372 | 0.000  | 0.000  |
| census housing units 2017 housing owner households valued 25000 29999                                                                                                  | -0.011 | 0.003 | -3.435 | 0.001 | -0.017 | -0.005 |
| census demographics 2017 families aged under 25 years families census demographics 2017 household average size persons                                                 | 0.000  | 0.000 | -0.541 | 0.588 | 0.000  | 0.000  |
| health adults 2017 type hospital outpatient department                                                                                                                 | 0.193  | 0.269 | 0.719  | 0.472 | -0.333 | 0.719  |
| health adults 2017 hiv ever tested                                                                                                                                     | 0.022  | 0.035 | 0.621  | 0.535 | -0.047 | 0.090  |
| health adults 2017 liver disease                                                                                                                                       | -0.020 | 0.263 | -0.077 | 0.939 | -0.535 | 0.495  |
| census demographics 2017 asian population alone persons                                                                                                                | -0.010 | 0.003 | -3.228 | 0.001 | -0.016 | -0.004 |
| health adults 2017 difficult of cannot be done climb up 10 steps without resting                                                                                       | 0.092  | 0.220 | 0.419  | 0.675 | -0.338 | 0.522  |
| health adults 2017 difficult of cannot be done lift or carry 10 pounds                                                                                                 | -0.439 | 0.275 | -1.598 | 0.110 | -0.978 | 0.099  |
| health adults 2017 body mass index underweight                                                                                                                         | -0.305 | 0.259 | -1.176 | 0.240 | -0.813 | 0.203  |
| health adults 2017 body mass index obese                                                                                                                               | -0.018 | 0.034 | -0.510 | 0.610 | -0.085 | 0.050  |
| health adults 2017 type some other place                                                                                                                               | 0.074  | 0.292 | 0.253  | 0.800 | -0.499 | 0.646  |
| health children 2017 number school days missed in past 12 months due to illness or injury aged 5 17 6 10 days                                                          | -0.023 | 0.049 | -0.470 | 0.638 | -0.120 | 0.074  |
| health children 2017 number school days missed in past 12 months due to illness or injury aged 5 17 did not go to school                                               | -0.002 | 0.006 | -0.400 | 0.689 | -0.013 | 0.009  |
| health children 2017 hay fever                                                                                                                                         | 0.106  | 0.065 | 1.624  | 0.104 | -0.022 | 0.233  |
| expenditures food 2017 steak                                                                                                                                           | -0.009 | 0.003 | -3.185 | 0.001 | -0.014 | -0.003 |
| health children 2017 children 3 to 17 learning disability                                                                                                              | 0.010  | 0.054 | 0.193  | 0.847 | -0.095 | 0.115  |
| health children 2017 children 3 to 17 attention deficit hyperactivity disorder                                                                                         | -0.066 | 0.047 | -1.391 | 0.164 | -0.159 | 0.027  |
| census housing units 2017 housing owner households valued 20000 24999                                                                                                  | -0.007 | 0.003 | -2.367 | 0.018 | -0.013 | -0.001 |
| health children 2017 with a usual place of health care emergency room                                                                                                  | 0.043  | 0.068 | 0.633  | 0.527 | -0.090 | 0.176  |
| health children 2017 with a usual place of health care hospital outpatient                                                                                             | 0.001  | 0.068 | 0.010  | 0.992 | -0.132 | 0.133  |
| health children 2017 with a usual place of health care some other place                                                                                                | -0.072 | 0.067 | -1.075 | 0.282 | -0.203 | 0.059  |
| census housing units 2017 housing owner households valued 750000 999999                                                                                                | -0.006 | 0.002 | -2.895 | 0.004 | -0.011 | -0.002 |
| health children 2017 last health care professional visit more than 1 year but not more than 2 years ago                                                                | 0.103  | 0.067 | 1.547  | 0.122 | -0.028 | 0.233  |
| census employment 2017 employment other services                                                                                                                       | -0.006 | 0.003 | -2.304 | 0.021 | -0.012 | -0.001 |
| health children 2017 last health care professional visit more than 5 years                                                                                             | -0.022 | 0.069 | -0.316 | 0.752 | -0.157 | 0.114  |
| health children 2017 delayed care due to cost                                                                                                                          | -0.073 | 0.064 | -1.140 | 0.254 | -0.198 | 0.052  |

|                                                                                                                                            |        |       |        |       |        |        |
|--------------------------------------------------------------------------------------------------------------------------------------------|--------|-------|--------|-------|--------|--------|
| health children 2017 children 2 17 years more than 2 years but not more than 5 years ago since last dental visit                           | 0.000  | 0.062 | -0.002 | 0.998 | -0.122 | 0.122  |
| census housing units 2017 housing no cash rent                                                                                             | -0.006 | 0.002 | -3.621 | 0.000 | -0.010 | -0.003 |
| health adults 2017 emphysema health children 2017 uninsured for health care                                                                | 0.000  | 0.000 | -0.242 | 0.809 | 0.000  | 0.000  |
| census employment 2017 employment car truck van to work carpool empl                                                                       | 0.000  | 0.001 | -0.127 | 0.899 | -0.003 | 0.002  |
| census employment 2017 employment public transportation to work empl                                                                       | 0.000  | 0.002 | 0.000  | 1.000 | -0.003 | 0.003  |
| census employment 2017 employment streetcar or trolley car to work empl                                                                    | 0.028  | 0.035 | 0.794  | 0.427 | -0.041 | 0.097  |
| census employment 2017 employment railroad to work empl                                                                                    | 0.004  | 0.004 | 1.010  | 0.312 | -0.004 | 0.011  |
| census employment 2017 employment taxi to work empl                                                                                        | 0.014  | 0.013 | 1.033  | 0.302 | -0.012 | 0.039  |
| census employment 2017 employment bicycle to work empl                                                                                     | -0.005 | 0.005 | -1.043 | 0.297 | -0.014 | 0.004  |
| census employment 2017 employment other transportation to work empl                                                                        | 0.000  | 0.004 | 0.081  | 0.936 | -0.007 | 0.008  |
| expenditures miscellaneous 2017 gas tank repair replacement expenditures miscellaneous 2017 coin operated apparel laundry and dry cleaning | -0.006 | 0.003 | -2.016 | 0.044 | -0.012 | 0.000  |
| census demographics 2017 non families aged 55 to 64 years households                                                                       | -0.005 | 0.002 | -2.838 | 0.005 | -0.008 | -0.002 |
| census employment 2017 employment potential                                                                                                | -0.004 | 0.011 | -0.328 | 0.743 | -0.025 | 0.017  |
| census employment 2017 employment armed forces male                                                                                        | 0.002  | 0.002 | 1.106  | 0.269 | -0.002 | 0.007  |
| census employment 2017 employment unemployed female                                                                                        | 0.008  | 0.006 | 1.247  | 0.212 | -0.005 | 0.021  |
| census employment 2017 employment construction                                                                                             | -0.005 | 0.002 | -2.345 | 0.019 | -0.008 | -0.001 |
| census employment 2017 employment mining quarrying and oil and gas extraction                                                              | 0.000  | 0.002 | -0.176 | 0.861 | -0.003 | 0.003  |
| census demographics 2017 families married families                                                                                         | -0.004 | 0.001 | -3.587 | 0.000 | -0.006 | -0.002 |
| census housing units 2017 housing owner households valued 250000 299999                                                                    | -0.003 | 0.001 | -2.549 | 0.011 | -0.005 | -0.001 |
| census employment 2017 employment wholesale trade                                                                                          | 0.004  | 0.003 | 1.223  | 0.221 | -0.002 | 0.011  |
| census employment 2017 employment information                                                                                              | -0.001 | 0.004 | -0.225 | 0.822 | -0.009 | 0.007  |
| census employment 2017 employment finance and insurance                                                                                    | -0.004 | 0.002 | -1.560 | 0.119 | -0.009 | 0.001  |
| census employment 2017 employment management of companies and enterprises                                                                  | 0.048  | 0.029 | 1.650  | 0.099 | -0.009 | 0.105  |
| census employment 2017 employment administrative and support and waste mgt services                                                        | -0.003 | 0.003 | -1.002 | 0.317 | -0.009 | 0.003  |
| census employment 2017 employment manufacturing                                                                                            | -0.002 | 0.001 | -2.037 | 0.042 | -0.004 | 0.000  |
| census employment 2017 employment arts entertainment and recreation                                                                        | 0.001  | 0.003 | 0.309  | 0.758 | -0.004 | 0.006  |
| census demographics 2017 hispanic households persons                                                                                       | -0.002 | 0.001 | -2.224 | 0.026 | -0.004 | 0.000  |
| census employment 2017 employment public administration                                                                                    | -0.002 | 0.002 | -1.255 | 0.210 | -0.006 | 0.001  |
| census employment 2017 employment travel time 30 59 min empl                                                                               | -0.002 | 0.001 | -2.498 | 0.013 | -0.003 | 0.000  |
| census employment 2017 occupation service                                                                                                  | 0.000  | 0.001 | -0.280 | 0.780 | -0.003 | 0.002  |

|                                                                                                                                               |        |       |        |       |        |       |
|-----------------------------------------------------------------------------------------------------------------------------------------------|--------|-------|--------|-------|--------|-------|
| census employment 2017 occupation farming fishing and forestry                                                                                | -0.002 | 0.003 | -0.967 | 0.334 | -0.008 | 0.003 |
| census employment 2017 employment private for profit wage and salary workers employee                                                         | 0.001  | 0.001 | 0.670  | 0.503 | -0.001 | 0.003 |
| expenditures food 2017 other school expenses including rentals expenditures miscellaneous 2017 coin operated apparel laundry and dry cleaning | -0.001 | 0.000 | -2.798 | 0.005 | -0.002 | 0.000 |
| expenditures home 2017 residential phone service voip and phone cards                                                                         | -0.001 | 0.000 | -2.019 | 0.044 | -0.002 | 0.000 |
| census employment 2017 employment local government workers                                                                                    | 0.000  | 0.002 | -0.034 | 0.973 | -0.003 | 0.003 |
| census employment 2017 employment state government workers                                                                                    | 0.000  | 0.002 | -0.144 | 0.886 | -0.003 | 0.003 |
| census employment 2017 employment unpaid family workers                                                                                       | 0.013  | 0.010 | 1.302  | 0.193 | -0.007 | 0.034 |
| census housing units 2017 home heating fuel bottled tank or lp gas                                                                            | -0.001 | 0.000 | -1.893 | 0.059 | -0.002 | 0.000 |
| census housing units 2017 home heating fuel electricity                                                                                       | 0.000  | 0.000 | 1.578  | 0.115 | 0.000  | 0.001 |
| census housing units 2017 housing built 1939 or earlier                                                                                       | -0.001 | 0.000 | -2.183 | 0.029 | -0.002 | 0.000 |
| census housing units 2017 home heating fuel wood                                                                                              | 0.001  | 0.001 | 1.682  | 0.093 | 0.000  | 0.002 |
| census housing units 2017 home heating fuel solar energy                                                                                      | 0.001  | 0.018 | 0.072  | 0.943 | -0.033 | 0.036 |
| census housing units 2017 home heating fuel other fuel                                                                                        | 0.003  | 0.003 | 1.091  | 0.275 | -0.002 | 0.008 |
| census housing units 2017 home heating fuel no fuel used                                                                                      | 0.000  | 0.001 | -0.056 | 0.955 | -0.002 | 0.002 |
| census housing units 2017 housing vacant units for rent                                                                                       | 0.002  | 0.002 | 1.217  | 0.224 | -0.001 | 0.006 |
| census housing units 2017 housing vacant units rented not occupied                                                                            | -0.005 | 0.018 | -0.302 | 0.763 | -0.041 | 0.030 |
| census housing units 2017 home heating fuel fuel oil kerosene etc                                                                             | -0.001 | 0.000 | -2.737 | 0.006 | -0.001 | 0.000 |
| expenditures home 2017 personal services                                                                                                      | 0.000  | 0.000 | -2.283 | 0.023 | -0.001 | 0.000 |
| census housing units 2017 housing vacant units for migrant workers                                                                            | -0.018 | 0.015 | -1.218 | 0.223 | -0.047 | 0.011 |
| census housing units 2017 housing vacant units vacant other                                                                                   | 0.000  | 0.001 | -0.176 | 0.860 | -0.003 | 0.002 |
| census housing units 2017 housing structure with 2 units                                                                                      | 0.000  | 0.001 | 0.393  | 0.694 | -0.002 | 0.002 |
| census housing units 2017 housing structure with 3 4 units                                                                                    | 0.000  | 0.001 | -0.176 | 0.861 | -0.002 | 0.002 |
| census housing units 2017 housing structure with 20 49 units                                                                                  | -0.002 | 0.001 | -1.408 | 0.159 | -0.005 | 0.001 |
| census housing units 2017 housing structure with 50 units                                                                                     | 0.001  | 0.001 | 0.517  | 0.605 | -0.002 | 0.003 |
| census employment 2017 occupation management business and financial operations census housing units 2017 housing median year built count year | 0.000  | 0.000 | -3.162 | 0.002 | 0.000  | 0.000 |
| census demographics 2017 population urban persons census demographics 2017 household average size persons                                     | 0.000  | 0.000 | -2.702 | 0.007 | 0.000  | 0.000 |
| census employment 2017 employment travel time 15 29 min empl census housing units 2017 housing median year built count year                   | 0.000  | 0.000 | -2.483 | 0.013 | 0.000  | 0.000 |
| census housing units 2017 housing owner households valued less than 10000                                                                     | 0.003  | 0.002 | 1.446  | 0.148 | -0.001 | 0.008 |

|                                                                                                                                                         |        |       |        |       |        |       |
|---------------------------------------------------------------------------------------------------------------------------------------------------------|--------|-------|--------|-------|--------|-------|
| census housing units 2017 housing owner households valued 10000 14999                                                                                   | 0.000  | 0.003 | 0.152  | 0.879 | -0.005 | 0.006 |
| census demographics 2017 household income median<br>census demographics 2017 household average size persons                                             | 0.000  | 0.000 | 3.487  | 0.000 | 0.000  | 0.000 |
| census housing units 2017 home heating fuel fuel oil kerosene etc census housing units 2017 housing median year built count year                        | 0.000  | 0.000 | 2.322  | 0.020 | 0.000  | 0.000 |
| census housing units 2017 housing owner households valued 35000 39999                                                                                   | 0.003  | 0.003 | 1.035  | 0.301 | -0.003 | 0.010 |
| census housing units 2017 housing owner households valued 50000 59999                                                                                   | 0.002  | 0.002 | 1.217  | 0.224 | -0.001 | 0.006 |
| census employment 2017 employment health care and social assistance census housing units 2017 housing median year built count year                      | 0.000  | 0.000 | 2.310  | 0.021 | 0.000  | 0.000 |
| census employment 2017 employment self employed workers in own not incorporated business census housing units 2017 housing median year built count year | 0.000  | 0.000 | 3.311  | 0.001 | 0.000  | 0.000 |
| census housing units 2017 housing built 1980 to 1989                                                                                                    | 0.001  | 0.001 | 0.964  | 0.335 | -0.001 | 0.002 |
| census housing units 2017 housing built 1950 to 1959                                                                                                    | 0.000  | 0.001 | -0.736 | 0.462 | -0.002 | 0.001 |
| expenditures food 2017 fresh fish and shellfish expenditures miscellaneous 2017 coin operated apparel laundry and dry cleaning                          | 0.001  | 0.000 | 2.595  | 0.010 | 0.000  | 0.001 |
| expenditures food 2017 food on out of town trips                                                                                                        | 0.001  | 0.000 | 2.501  | 0.012 | 0.000  | 0.002 |
| census housing units 2017 housing year moved in 2000 to 2009                                                                                            | 0.000  | 0.001 | 0.174  | 0.862 | -0.001 | 0.002 |
| census housing units 2017 housing year moved in 1970 to 1979                                                                                            | 0.003  | 0.002 | 1.801  | 0.072 | 0.000  | 0.006 |
| census housing units 2017 housing year moved in 1969 or earlier                                                                                         | 0.002  | 0.002 | 0.858  | 0.391 | -0.003 | 0.007 |
| census employment 2017 employment walked to work empl census housing units 2017 housing median year built count year                                    | 0.000  | 0.000 | 0.768  | 0.442 | 0.000  | 0.000 |
| census demographics 2017 non family households male householder with no people under 18 households                                                      | 0.002  | 0.001 | 2.970  | 0.003 | 0.001  | 0.003 |
| census employment 2017 employment agriculture forestry fishing and hunting census housing units 2017 housing median year built count year               | 0.000  | 0.000 | 1.909  | 0.056 | 0.000  | 0.000 |
| census demographics 2017 education enrolled public grades 1 4 pop 3 persons                                                                             | 0.002  | 0.001 | 2.043  | 0.041 | 0.000  | 0.003 |
| expenditures food 2017 dinner at fast food take out delivery concession stands buffet and cafeteria                                                     | 0.002  | 0.001 | 2.214  | 0.027 | 0.000  | 0.003 |
| expenditures home 2017 major appliances                                                                                                                 | 0.002  | 0.001 | 3.002  | 0.003 | 0.001  | 0.003 |
| census employment 2017 employment travel time 15 29 min empl                                                                                            | 0.002  | 0.001 | 3.137  | 0.002 | 0.001  | 0.004 |
| expenditures food 2017 nonalcoholic beer                                                                                                                | 0.268  | 0.300 | 0.892  | 0.372 | -0.321 | 0.857 |
| census housing units 2017 housing rent 750 999                                                                                                          | 0.003  | 0.001 | 2.563  | 0.010 | 0.001  | 0.005 |
| expenditures food 2017 dinner at vending machines and mobile vendors                                                                                    | -0.084 | 0.060 | -1.412 | 0.158 | -0.201 | 0.033 |
| expenditures food 2017 snacks and nonalcoholic beverages at full service restaurants                                                                    | 0.003  | 0.004 | 0.749  | 0.454 | -0.005 | 0.010 |
| expenditures food 2017 food or board at school                                                                                                          | 0.000  | 0.004 | -0.002 | 0.999 | -0.009 | 0.009 |

|                                                                                             |        |       |        |       |        |       |
|---------------------------------------------------------------------------------------------|--------|-------|--------|-------|--------|-------|
| expenditures food 2017 catered affairs                                                      | -0.003 | 0.002 | -1.370 | 0.171 | -0.007 | 0.001 |
| expenditures food 2017 elementary and high school tuition                                   | 0.000  | 0.001 | 0.467  | 0.641 | -0.001 | 0.002 |
| expenditures food 2017 vocational and technical school tuition                              | -0.037 | 0.028 | -1.329 | 0.184 | -0.092 | 0.018 |
| expenditures food 2017 test preparation tutoring services                                   | 0.000  | 0.003 | 0.003  | 0.998 | -0.005 | 0.005 |
| census housing units 2017 housing built 1940 to 1949                                        | 0.003  | 0.001 | 2.773  | 0.006 | 0.001  | 0.004 |
| census employment 2017 employment not in the labor force female                             | 0.003  | 0.001 | 2.471  | 0.014 | 0.001  | 0.006 |
| expenditures food 2017 school books supplies equipment for vocational and technical schools | 0.125  | 0.119 | 1.054  | 0.292 | -0.108 | 0.358 |
| expenditures food 2017 eggs                                                                 | -0.004 | 0.005 | -0.835 | 0.404 | -0.014 | 0.006 |
| census demographics 2017 non families aged 35 to 44 years households                        | 0.003  | 0.002 | 2.128  | 0.033 | 0.000  | 0.007 |
| expenditures food 2017 oranges                                                              | -0.008 | 0.007 | -1.130 | 0.259 | -0.022 | 0.006 |
| census employment 2017 employment private not for profit wage and salary workers            | 0.004  | 0.002 | 1.991  | 0.047 | 0.000  | 0.007 |
| expenditures food 2017 school lunches                                                       | 0.000  | 0.001 | 0.598  | 0.550 | -0.001 | 0.002 |
| expenditures food 2017 whiskey                                                              | -0.008 | 0.006 | -1.352 | 0.176 | -0.020 | 0.004 |
| expenditures food 2017 other alcoholic beverages away                                       | -0.002 | 0.001 | -1.385 | 0.166 | -0.004 | 0.001 |
| expenditures food 2017 other beef                                                           | -0.013 | 0.007 | -1.861 | 0.063 | -0.026 | 0.001 |
| expenditures food 2017 frankfurters                                                         | -0.011 | 0.014 | -0.815 | 0.415 | -0.038 | 0.016 |
| expenditures food 2017 canned fish and seafood                                              | -0.021 | 0.022 | -0.941 | 0.347 | -0.064 | 0.023 |
| census employment 2017 occupation sales and office                                          | 0.004  | 0.001 | 2.781  | 0.005 | 0.001  | 0.007 |
| expenditures food 2017 canned fruits                                                        | 0.003  | 0.008 | 0.340  | 0.734 | -0.012 | 0.017 |
| expenditures food 2017 canned and bottled fruit juice                                       | 0.001  | 0.002 | 0.744  | 0.457 | -0.002 | 0.005 |
| expenditures food 2017 rice                                                                 | 0.001  | 0.001 | 0.758  | 0.449 | -0.002 | 0.003 |
| expenditures food 2017 cookies and crackers                                                 | -0.001 | 0.001 | -0.500 | 0.617 | -0.003 | 0.002 |
| expenditures food 2017 ice cream and related products                                       | 0.004  | 0.002 | 2.231  | 0.026 | 0.001  | 0.008 |
| census employment 2017 employment private for profit wage and salary workers self           | 0.008  | 0.003 | 3.091  | 0.002 | 0.003  | 0.014 |
| expenditures food 2017 sugar                                                                | 0.006  | 0.006 | 0.903  | 0.366 | -0.007 | 0.019 |
| expenditures food 2017 margarine                                                            | -0.002 | 0.029 | -0.053 | 0.958 | -0.059 | 0.055 |
| expenditures food 2017 prepared salads                                                      | 0.007  | 0.005 | 1.309  | 0.191 | -0.003 | 0.017 |
| expenditures food 2017 baby food                                                            | -0.003 | 0.002 | -1.417 | 0.156 | -0.006 | 0.001 |
| expenditures home 2017 window coverings                                                     | 0.012  | 0.014 | 0.906  | 0.365 | -0.014 | 0.039 |
| expenditures home 2017 infants equipment                                                    | -0.002 | 0.004 | -0.629 | 0.529 | -0.009 | 0.005 |
| expenditures home 2017 clocks and decorative items                                          | -0.002 | 0.003 | -0.732 | 0.464 | -0.008 | 0.004 |
| expenditures home 2017 lawn and garden equipment                                            | 0.000  | 0.002 | 0.166  | 0.868 | -0.004 | 0.004 |
| expenditures home 2017 power tools                                                          | 0.012  | 0.007 | 1.680  | 0.093 | -0.002 | 0.027 |
| expenditures home 2017 computer accessories                                                 | -0.004 | 0.006 | -0.672 | 0.501 | -0.016 | 0.008 |
| expenditures home 2017 business equipment for home use                                      | -0.009 | 0.068 | -0.132 | 0.895 | -0.142 | 0.124 |



|                                                                                                 |        |       |        |       |        |       |
|-------------------------------------------------------------------------------------------------|--------|-------|--------|-------|--------|-------|
| expenditures home 2017 mens suits                                                               | -0.001 | 0.003 | -0.257 | 0.797 | -0.007 | 0.005 |
| expenditures home 2017 mens hosiery                                                             | 0.013  | 0.016 | 0.860  | 0.390 | -0.017 | 0.044 |
| expenditures home 2017 mens nightwear                                                           | -0.106 | 0.137 | -0.776 | 0.438 | -0.375 | 0.162 |
| expenditures home 2017 mens pants and shorts                                                    | 0.002  | 0.003 | 0.917  | 0.359 | -0.003 | 0.007 |
| expenditures home 2017 mens uniforms                                                            | -0.022 | 0.078 | -0.278 | 0.781 | -0.174 | 0.131 |
| expenditures home 2017 boys nightwear                                                           | -0.178 | 0.153 | -1.167 | 0.243 | -0.477 | 0.121 |
| expenditures home 2017 ground rent                                                              | 0.000  | 0.001 | 0.061  | 0.951 | -0.002 | 0.002 |
| expenditures home 2017 rent as pay                                                              | -0.002 | 0.001 | -1.733 | 0.083 | -0.004 | 0.000 |
| expenditures home 2017 tenants insurance                                                        | 0.012  | 0.006 | 1.937  | 0.053 | 0.000  | 0.024 |
| census employment 2017 employment health care and social assistance                             | 0.009  | 0.002 | 5.639  | 0.000 | 0.006  | 0.013 |
| expenditures home 2017 computer installation                                                    | 0.035  | 0.220 | 0.159  | 0.874 | -0.397 | 0.467 |
| expenditures home 2017 sofas                                                                    | -0.002 | 0.001 | -1.817 | 0.069 | -0.003 | 0.000 |
| expenditures home 2017 outdoor furniture                                                        | 0.001  | 0.004 | 0.356  | 0.722 | -0.007 | 0.009 |
| census demographics 2017 education attainment professional degree pop 25 persons                | 0.010  | 0.003 | 2.958  | 0.003 | 0.003  | 0.016 |
| expenditures food 2017 other school expenses including rentals                                  | 0.027  | 0.009 | 3.215  | 0.001 | 0.011  | 0.044 |
| expenditures home 2017 sound equipment accessories                                              | 0.019  | 0.042 | 0.446  | 0.656 | -0.064 | 0.101 |
| expenditures home 2017 online gaming services                                                   | 0.061  | 0.078 | 0.779  | 0.436 | -0.092 | 0.214 |
| expenditures home 2017 vcr s and video disc players                                             | -0.123 | 0.091 | -1.353 | 0.176 | -0.302 | 0.055 |
| expenditures home 2017 streaming downloading video                                              | 0.001  | 0.028 | 0.049  | 0.961 | -0.053 | 0.056 |
| expenditures home 2017 repair of tv radio and sound equipment                                   | -0.187 | 0.153 | -1.222 | 0.222 | -0.488 | 0.113 |
| expenditures home 2017 womens hosiery                                                           | 0.028  | 0.011 | 2.511  | 0.012 | 0.006  | 0.050 |
| expenditures home 2017 personal digital audio players                                           | -0.122 | 0.105 | -1.158 | 0.247 | -0.329 | 0.085 |
| expenditures home 2017 musical instruments and accessories                                      | 0.009  | 0.012 | 0.753  | 0.452 | -0.015 | 0.034 |
| expenditures home 2017 rental of party supplies for catered affairs                             | -0.008 | 0.006 | -1.242 | 0.215 | -0.019 | 0.004 |
| expenditures home 2017 boys shirts and sweaters                                                 | 0.011  | 0.007 | 1.548  | 0.122 | -0.003 | 0.026 |
| expenditures home 2017 kitchen dining room other linens                                         | -0.038 | 0.026 | -1.482 | 0.138 | -0.089 | 0.012 |
| expenditures home 2017 stereos radios speakers and sound components including those in vehicles | -0.004 | 0.003 | -1.127 | 0.260 | -0.010 | 0.003 |
| expenditures miscellaneous 2017 purchase of boat with motor                                     | 0.051  | 0.018 | 2.908  | 0.004 | 0.017  | 0.085 |
| expenditures home 2017 clothes washer or dryer owner                                            | 0.007  | 0.005 | 1.523  | 0.128 | -0.002 | 0.016 |
| expenditures home 2017 womens sweaters shirts tops vests                                        | 0.001  | 0.002 | 0.830  | 0.407 | -0.002 | 0.005 |
| expenditures home 2017 interest paid home equity loan                                           | -0.005 | 0.004 | -1.156 | 0.248 | -0.013 | 0.003 |
| expenditures food 2017 pies tarts turnovers                                                     | 0.055  | 0.015 | 3.561  | 0.000 | 0.025  | 0.085 |
| expenditures home 2017 womens accessories                                                       | -0.001 | 0.001 | -0.908 | 0.364 | -0.002 | 0.001 |
| census demographics 2017 households 6 person households                                         | 0.097  | 0.045 | 2.143  | 0.032 | 0.008  | 0.185 |
| expenditures home 2017 children under 2                                                         | 0.003  | 0.002 | 1.530  | 0.126 | -0.001 | 0.007 |

|                                                                                                                                                        |        |       |        |       |        |       |
|--------------------------------------------------------------------------------------------------------------------------------------------------------|--------|-------|--------|-------|--------|-------|
| expenditures miscellaneous 2017 finance late interest charges for credit cards                                                                         | -0.005 | 0.007 | -0.819 | 0.413 | -0.018 | 0.007 |
| expenditures miscellaneous 2017 value of savings checking money market and c ds                                                                        | 0.000  | 0.000 | -1.485 | 0.138 | -0.001 | 0.000 |
| expenditures miscellaneous 2017 care for elderly invalids handicapped etc                                                                              | -0.034 | 0.028 | -1.212 | 0.226 | -0.089 | 0.021 |
| expenditures miscellaneous 2017 shoe repair and other shoe service                                                                                     | 0.026  | 0.223 | 0.116  | 0.908 | -0.412 | 0.463 |
| expenditures miscellaneous 2017 new cars                                                                                                               | 0.000  | 0.003 | -0.007 | 0.995 | -0.006 | 0.006 |
| expenditures miscellaneous 2017 new motorcycles                                                                                                        | 0.003  | 0.021 | 0.120  | 0.905 | -0.039 | 0.045 |
| expenditures miscellaneous 2017 used motorcycles                                                                                                       | -0.017 | 0.019 | -0.917 | 0.359 | -0.054 | 0.020 |
| expenditures miscellaneous 2017 vehicle products and cleaning services                                                                                 | -0.153 | 0.083 | -1.843 | 0.065 | -0.315 | 0.010 |
| expenditures miscellaneous 2017 body work and painting                                                                                                 | -0.004 | 0.111 | -0.034 | 0.973 | -0.222 | 0.214 |
| expenditures miscellaneous 2017 towing charges                                                                                                         | 0.065  | 0.156 | 0.415  | 0.678 | -0.241 | 0.371 |
| expenditures miscellaneous 2017 care in convalescent or nursing home                                                                                   | 0.029  | 0.025 | 1.162  | 0.245 | -0.020 | 0.078 |
| expenditures miscellaneous 2017 rental of supportive convalescent medical equipment                                                                    | -0.247 | 0.272 | -0.909 | 0.363 | -0.780 | 0.286 |
| health children 2017 children 2 17 years more than 5 years since last dental visit                                                                     | 0.103  | 0.027 | 3.819  | 0.000 | 0.050  | 0.156 |
| expenditures miscellaneous 2017 hunting and fishing equipment                                                                                          | -0.006 | 0.018 | -0.305 | 0.761 | -0.041 | 0.030 |
| expenditures miscellaneous 2017 other photographic supplies                                                                                            | 0.180  | 0.263 | 0.687  | 0.492 | -0.334 | 0.695 |
| expenditures miscellaneous 2017 pinball electronic video games                                                                                         | -0.135 | 0.163 | -0.825 | 0.410 | -0.455 | 0.186 |
| expenditures miscellaneous 2017 lotteries and pari mutuel losses                                                                                       | -0.026 | 0.024 | -1.098 | 0.272 | -0.073 | 0.021 |
| expenditures miscellaneous 2017 dating services                                                                                                        | -0.500 | 0.265 | -1.891 | 0.059 | -1.019 | 0.018 |
| expenditures home 2017 rental of televisions                                                                                                           | 0.187  | 0.067 | 2.779  | 0.005 | 0.055  | 0.319 |
| expenditures miscellaneous 2017 gift to non cu members of stocks bonds and mutual funds                                                                | 0.009  | 0.006 | 1.526  | 0.127 | -0.003 | 0.021 |
| expenditures food 2017 dinner at employer and school cafeterias expenditures miscellaneous 2017 coin operated apparel laundry and dry cleaning         | 0.000  | 0.001 | 0.222  | 0.825 | -0.001 | 0.002 |
| expenditures food 2017 breakfast and brunch at full service restaurants expenditures miscellaneous 2017 coin operated apparel laundry and dry cleaning | 0.000  | 0.000 | 0.887  | 0.375 | 0.000  | 0.000 |
| expenditures miscellaneous 2017 shopping club membership fees                                                                                          | 0.272  | 0.104 | 2.613  | 0.009 | 0.068  | 0.476 |
| expenditures food 2017 meals as pay expenditures miscellaneous 2017 coin operated apparel laundry and dry cleaning                                     | 0.000  | 0.000 | -0.766 | 0.444 | 0.000  | 0.000 |
| health adults 2017 stroke                                                                                                                              | 0.635  | 0.265 | 2.401  | 0.016 | 0.117  | 1.154 |
| expenditures food 2017 fats and oils expenditures miscellaneous 2017 coin operated apparel laundry and dry cleaning                                    | 0.000  | 0.000 | -1.060 | 0.289 | -0.001 | 0.000 |
| expenditures home 2017 office furniture for home use expenditures miscellaneous 2017 coin operated apparel laundry and dry cleaning                    | 0.000  | 0.001 | 0.586  | 0.558 | -0.001 | 0.002 |

|                                                                                                                                                  |        |       |        |       |        |        |
|--------------------------------------------------------------------------------------------------------------------------------------------------|--------|-------|--------|-------|--------|--------|
| expenditures home 2017 rent expenditures miscellaneous 2017 coin operated apparel laundry and dry cleaning                                       | 0.000  | 0.000 | -0.075 | 0.941 | 0.000  | 0.000  |
| expenditures home 2017 housekeeping services expenditures miscellaneous 2017 coin operated apparel laundry and dry cleaning                      | 0.000  | 0.000 | -0.489 | 0.625 | 0.000  | 0.000  |
| expenditures home 2017 rental of televisions expenditures miscellaneous 2017 coin operated apparel laundry and dry cleaning                      | -0.005 | 0.003 | -1.658 | 0.097 | -0.012 | 0.001  |
| expenditures home 2017 boys uniforms and active sportswear expenditures miscellaneous 2017 coin operated apparel laundry and dry cleaning        | -0.001 | 0.001 | -1.676 | 0.094 | -0.002 | 0.000  |
| expenditures miscellaneous 2017 newspapers expenditures miscellaneous 2017 coin operated apparel laundry and dry cleaning                        | 3.529  | 1.111 | 3.177  | 0.002 | 1.352  | 5.706  |
| (Intercept)                                                                                                                                      | 18.394 | 4.172 | 4.410  | 0.000 | 10.218 | 26.571 |
| expenditures miscellaneous 2017 global positioning system devices expenditures miscellaneous 2017 coin operated apparel laundry and dry cleaning | -0.002 | 0.002 | -1.086 | 0.277 | -0.007 | 0.002  |
| expenditures miscellaneous 2017 vacation clubs expenditures miscellaneous 2017 coin operated apparel laundry and dry cleaning                    | 0.000  | 0.000 | -0.423 | 0.672 | 0.000  | 0.000  |

HH=Household

Fam=Family

Pop=Population

Non Fam=Non family

OT=Other

ER=Emergency room

RV=recreational vehicle

Equip=equipment

Misc.=miscellaneous

BCBS=Blue Cross Blue Shield

OOT=Out of town

RIHC=resource intensive healthcare
