# Supplementary material for: Can diverse population characteristics be leveraged in a machine learning pipeline to predict resource intensive healthcare utilization among hospital service areas?
Source: Springer Nature journal article supplement (doi:10.1186/s12913-022-08154-4), 2022-06-30
Supplement: MOESM17 [file 23224174]

Additional File 17. Multiple Linear Regression of Log Hospital Expenditures Per Capita in Hospital Service Areas 2017 (N=3,174, Adjusted R<sup>2</sup> 0.829)

- Additional File 17
  - File format: PDF
  - File title: Multiple Linear Regression of Log Hospital Expenditures Per Capita in Hospital Service Areas 2017 (N=3,174, Adjusted R<sup>2</sup> 0.829)
  - File description: Long table, model output for regression model for hospital expenditures per capita

| <b>Variable (expressed per capita or per capita percent)</b>                        | <b>Coefficient</b> | <b>Standard Error</b> | <b>Z Statistic</b> | <b>P Value</b> | <b>95% Lower</b> | <b>95% Upper</b> |
|-------------------------------------------------------------------------------------|--------------------|-----------------------|--------------------|----------------|------------------|------------------|
| (Intercept)                                                                         | 4.891              | 6.595                 | 0.742              | 0.458          | -8.035           | 17.818           |
| census demographics 2017 household income average                                   | 0.000              | 0.000                 | -1.474             | 0.141          | 0.000            | 0.000            |
| census demographics 2017 other race population alone persons                        | -0.939             | 0.233                 | -4.038             | 0.000          | -1.395           | -0.483           |
| census demographics 2017 population speaks other language pop 5 persons             | 0.021              | 0.061                 | 0.347              | 0.729          | -0.099           | 0.141            |
| census demographics 2017 population citizenship foreign born not a citizen persons  | -0.001             | 0.001                 | -1.566             | 0.117          | -0.002           | 0.000            |
| census demographics 2017 veterans total persons                                     | 0.000              | 0.001                 | -0.012             | 0.991          | -0.001           | 0.001            |
| census demographics 2017 population institutional group quarters persons            | 0.000              | 0.000                 | -1.040             | 0.299          | 0.000            | 0.000            |
| census demographics 2017 householder aged 25 to 34 years households                 | -0.013             | 0.007                 | -1.878             | 0.060          | -0.027           | 0.001            |
| expenditures miscellaneous 2017 termination fee for car truck lease                 | -0.706             | 0.191                 | -3.691             | 0.000          | -1.081           | -0.331           |
| expenditures home 2017 mens nightwear                                               | -0.611             | 0.101                 | -6.021             | 0.000          | -0.810           | -0.412           |
| census demographics 2017 householder aged 85 years and over households              | 0.002              | 0.005                 | 0.515              | 0.606          | -0.007           | 0.012            |
| expenditures miscellaneous 2017 rental of supportive convalescent medical equipment | -0.518             | 0.188                 | -2.751             | 0.006          | -0.888           | -0.149           |
| expenditures miscellaneous 2017 rental of medical equipment                         | -0.408             | 0.207                 | -1.976             | 0.048          | -0.813           | -0.003           |
| expenditures miscellaneous 2017 rental and repair of miscellaneous sports equipment | -0.407             | 0.161                 | -2.520             | 0.012          | -0.723           | -0.090           |
| expenditures miscellaneous 2017 shoe repair and other shoe service                  | -0.386             | 0.159                 | -2.421             | 0.016          | -0.699           | -0.073           |
| census demographics 2017 education enrolled public or private school pop 3 persons  | 0.000              | 0.000                 | -0.401             | 0.688          | -0.001           | 0.001            |
| expenditures home 2017 infant coat jacket snowsuit                                  | -0.329             | 0.157                 | -2.096             | 0.036          | -0.636           | -0.021           |
| census demographics 2017 education enrolled public kindergarten pop 3 persons       | 0.001              | 0.001                 | 0.593              | 0.553          | -0.001           | 0.002            |
| census demographics 2017 education enrolled private kindergarten pop 3 persons      | -0.001             | 0.003                 | -0.245             | 0.806          | -0.007           | 0.005            |

|                                                                                                      |        |       |        |       |        |        |
|------------------------------------------------------------------------------------------------------|--------|-------|--------|-------|--------|--------|
| census demographics 2017 education enrolled public grades 1 4 pop 3 persons                          | 0.000  | 0.001 | 0.385  | 0.700 | -0.001 | 0.001  |
| census demographics 2017 education enrolled private grades 1 4 pop 3 persons                         | 0.000  | 0.001 | -0.046 | 0.964 | -0.003 | 0.003  |
| expenditures miscellaneous 2017 coolant brake fluid transmission fluid and other additives           | -0.305 | 0.090 | -3.371 | 0.001 | -0.482 | -0.127 |
| census demographics 2017 education enrolled private grades 5 8 pop 3 persons                         | 0.000  | 0.001 | -0.026 | 0.980 | -0.003 | 0.003  |
| census demographics 2017 education enrolled public grades 9 12 pop 3 persons                         | 0.000  | 0.001 | -0.455 | 0.649 | -0.001 | 0.001  |
| census demographics 2017 education enrolled public undergraduate college pop 3 persons               | 0.000  | 0.000 | -0.878 | 0.380 | -0.001 | 0.000  |
| health children 2017 last health care professional visit more than 2 years but less than 5 years ago | -0.236 | 0.048 | -4.896 | 0.000 | -0.330 | -0.141 |
| census demographics 2017 education enrolled private graduate or professional school pop 3 persons    | 0.002  | 0.001 | 1.617  | 0.106 | 0.000  | 0.005  |
| expenditures food 2017 school books supplies equipment for day care nursery                          | -0.157 | 0.061 | -2.593 | 0.010 | -0.276 | -0.038 |
| census demographics 2017 education attainment some college pop 25 persons                            | 0.000  | 0.000 | 1.101  | 0.271 | 0.000  | 0.001  |
| census demographics 2017 population in poverty total persons                                         | 0.000  | 0.000 | -1.051 | 0.293 | -0.001 | 0.000  |
| census demographics 2017 education attainment associate s degree pop 25 persons                      | 0.000  | 0.001 | -0.515 | 0.606 | -0.001 | 0.001  |
| census demographics 2017 education attainment bachelor s degree pop 25 persons                       | 0.001  | 0.001 | 1.193  | 0.233 | 0.000  | 0.002  |
| health children 2017 children 3 to 17 attention deficit hyperactivity disorder                       | -0.146 | 0.037 | -3.949 | 0.000 | -0.219 | -0.074 |
| census demographics 2017 education attainment doctorate degree pop 25 persons                        | 0.224  | 0.577 | 0.389  | 0.698 | -0.907 | 1.356  |
| census demographics 2017 households with income 15000 to 24999 households                            | 0.014  | 0.008 | 1.765  | 0.078 | -0.002 | 0.029  |
| census demographics 2017 households with income 25000 to 34999 households                            | -0.005 | 0.008 | -0.621 | 0.534 | -0.020 | 0.011  |
| census demographics 2017 households with income 50000 to 74999 households                            | 0.001  | 0.007 | 0.207  | 0.836 | -0.012 | 0.014  |
| census demographics 2017 households with income 75000 to 99999 households                            | 0.006  | 0.008 | 0.774  | 0.439 | -0.009 | 0.021  |
| census demographics 2017 households with income 100000 to 124999 households                          | -0.004 | 0.005 | -0.674 | 0.500 | -0.014 | 0.007  |
| census demographics 2017 households 1 person households                                              | 0.000  | 0.004 | 0.087  | 0.930 | -0.007 | 0.007  |
| census demographics 2017 households 3 person households                                              | -0.003 | 0.002 | -1.502 | 0.133 | -0.008 | 0.001  |
| health children 2017 last health care professional visit 6 months or less                            | -0.122 | 0.043 | -2.834 | 0.005 | -0.207 | -0.038 |
| census demographics 2017 households 5 person households                                              | 0.000  | 0.004 | 0.009  | 0.993 | -0.009 | 0.009  |
| census demographics 2017 head of household male households                                           | 0.001  | 0.002 | 0.565  | 0.572 | -0.002 | 0.004  |
| census demographics 2017 families married families                                                   | 0.000  | 0.001 | 0.389  | 0.697 | -0.002 | 0.003  |
| expenditures home 2017 rental and repair of musical instruments                                      | -0.121 | 0.060 | -2.028 | 0.043 | -0.238 | -0.004 |

|                                                                                                                        |        |       |        |       |        |        |
|------------------------------------------------------------------------------------------------------------------------|--------|-------|--------|-------|--------|--------|
| census demographics 2017 other families male householder no wife present with children under 18 other families         | 0.000  | 0.000 | 0.698  | 0.486 | -0.001 | 0.001  |
| census demographics 2017 other families female householder no husband present with no children under 18 other families | 0.000  | 0.000 | 0.325  | 0.745 | -0.001 | 0.001  |
| census demographics 2017 non family head of household male households                                                  | 0.001  | 0.001 | 1.015  | 0.310 | 0.000  | 0.002  |
| census demographics 2017 non family households male householder with people under 18 households                        | -0.002 | 0.004 | -0.581 | 0.561 | -0.009 | 0.005  |
| census demographics 2017 non family households male householder with no people under 18 households                     | 0.000  | 0.000 | 0.983  | 0.326 | 0.000  | 0.001  |
| census demographics 2017 non family households female householder with people under 18 households                      | 0.016  | 0.008 | 1.849  | 0.064 | -0.001 | 0.032  |
| health children 2017 very good health status respondent assessed                                                       | -0.117 | 0.044 | -2.657 | 0.008 | -0.204 | -0.031 |
| census demographics 2017 population male persons                                                                       | 0.002  | 0.005 | 0.434  | 0.664 | -0.007 | 0.012  |
| health children 2017 skin allergies                                                                                    | -0.110 | 0.039 | -2.795 | 0.005 | -0.187 | -0.033 |
| health children 2017 without a usual place of health care                                                              | -0.105 | 0.047 | -2.229 | 0.026 | -0.196 | -0.013 |
| census demographics 2017 american indian and alaska native head of households households                               | 0.008  | 0.004 | 1.884  | 0.060 | 0.000  | 0.015  |
| census demographics 2017 two or more races head of households households                                               | -0.007 | 0.004 | -1.882 | 0.060 | -0.015 | 0.000  |
| expenditures home 2017 womens uniforms                                                                                 | -0.066 | 0.031 | -2.129 | 0.033 | -0.126 | -0.005 |
| census demographics 2017 families 6 person families                                                                    | -0.002 | 0.002 | -0.895 | 0.371 | -0.006 | 0.002  |
| census demographics 2017 families 7 or more person families                                                            | 0.002  | 0.002 | 1.179  | 0.238 | -0.001 | 0.006  |
| census demographics 2017 non families 2 person households                                                              | 0.001  | 0.001 | 0.632  | 0.528 | -0.001 | 0.002  |
| census demographics 2017 non families 4 person households                                                              | -0.005 | 0.003 | -1.587 | 0.113 | -0.011 | 0.001  |
| census demographics 2017 non families 6 person households                                                              | 0.001  | 0.002 | 0.415  | 0.679 | -0.004 | 0.006  |
| census demographics 2017 non families 7 or more person households                                                      | -0.004 | 0.011 | -0.358 | 0.721 | -0.026 | 0.018  |
| census demographics 2017 families aged under 25 years families                                                         | 0.001  | 0.002 | 0.348  | 0.728 | -0.003 | 0.004  |
| census demographics 2017 families aged 55 to 64 years families                                                         | 0.002  | 0.002 | 1.271  | 0.204 | -0.001 | 0.005  |
| census demographics 2017 families aged 65 to 74 years families                                                         | -0.003 | 0.002 | -1.313 | 0.189 | -0.007 | 0.001  |
| expenditures home 2017 flatware                                                                                        | -0.049 | 0.015 | -3.227 | 0.001 | -0.079 | -0.019 |
| census demographics 2017 non families aged 25 to 34 years households                                                   | 0.000  | 0.001 | -0.533 | 0.594 | -0.002 | 0.001  |
| census demographics 2017 non families aged 45 to 54 years households                                                   | -0.001 | 0.001 | -1.587 | 0.113 | -0.003 | 0.000  |
| census demographics 2017 non families aged 65 to 74 years households                                                   | -0.002 | 0.001 | -1.720 | 0.086 | -0.004 | 0.000  |
| expenditures home 2017 kitchen dining room other linens                                                                | -0.033 | 0.012 | -2.798 | 0.005 | -0.056 | -0.010 |
| census demographics 2017 population median age years                                                                   | 0.001  | 0.001 | 1.686  | 0.092 | 0.000  | 0.002  |

|                                                                                                                            |        |       |        |       |        |        |
|----------------------------------------------------------------------------------------------------------------------------|--------|-------|--------|-------|--------|--------|
| census demographics 2017 families median age years                                                                         | -0.001 | 0.001 | -1.429 | 0.153 | -0.003 | 0.000  |
| census demographics 2017 households median size number persons                                                             | -0.009 | 0.006 | -1.458 | 0.145 | -0.021 | 0.003  |
| health adults 2017 full guidelines strengthening and aerobic combined met both muscle strengthening and aerobic guidelines | 0.000  | 0.080 | 0.005  | 0.996 | -0.156 | 0.157  |
| health adults 2017 serious psychological distress                                                                          | -0.175 | 0.206 | -0.852 | 0.394 | -0.579 | 0.228  |
| health adults 2017 type hospital outpatient department                                                                     | 0.331  | 0.227 | 1.460  | 0.144 | -0.113 | 0.776  |
| expenditures home 2017 sewing machines                                                                                     | -0.028 | 0.008 | -3.725 | 0.000 | -0.043 | -0.013 |
| health adults 2017 last dental visit more than 1 year but not more than 2 years ago                                        | -0.056 | 0.184 | -0.308 | 0.758 | -0.416 | 0.303  |
| health adults 2017 last dental visit never                                                                                 | -0.020 | 0.216 | -0.093 | 0.926 | -0.444 | 0.404  |
| health adults 2017 breast cancer                                                                                           | 0.254  | 0.223 | 1.142  | 0.254 | -0.182 | 0.690  |
| health adults 2017 hopelessness all or most of the time                                                                    | -0.014 | 0.217 | -0.066 | 0.948 | -0.440 | 0.412  |
| health adults 2017 stroke                                                                                                  | -0.014 | 0.213 | -0.067 | 0.946 | -0.433 | 0.404  |
| health adults 2017 difficult of cannot be done climb up 10 steps without resting                                           | -0.168 | 0.171 | -0.986 | 0.324 | -0.502 | 0.166  |
| health adults 2017 difficult of cannot be done grasp or handle small objects                                               | -0.058 | 0.260 | -0.223 | 0.823 | -0.568 | 0.452  |
| health adults 2017 difficult of cannot be done push or pull large objects                                                  | 0.087  | 0.180 | 0.486  | 0.627 | -0.265 | 0.440  |
| health adults 2017 emphysema                                                                                               | 0.247  | 0.226 | 1.093  | 0.275 | -0.196 | 0.690  |
| health adults 2017 ever had asthma                                                                                         | 0.116  | 0.151 | 0.766  | 0.444 | -0.181 | 0.412  |
| health adults 2017 every day smokers                                                                                       | -0.280 | 0.175 | -1.598 | 0.110 | -0.624 | 0.064  |
| health adults 2017 alcohol lifetime abstainer                                                                              | -0.061 | 0.049 | -1.238 | 0.216 | -0.157 | 0.035  |
| health adults 2017 alcohol current infrequent                                                                              | -0.215 | 0.127 | -1.692 | 0.091 | -0.465 | 0.034  |
| health adults 2017 body mass index healthy weight                                                                          | 0.032  | 0.022 | 1.475  | 0.140 | -0.010 | 0.074  |
| health adults 2017 without a usual place of health care                                                                    | -0.098 | 0.089 | -1.103 | 0.270 | -0.273 | 0.076  |
| health adults 2017 last doctor visit more than six months but less than 1 year                                             | 0.287  | 0.162 | 1.777  | 0.076 | -0.030 | 0.604  |
| health adults 2017 last doctor visit more than 2 years but less than 5 years ago                                           | -0.138 | 0.217 | -0.636 | 0.525 | -0.564 | 0.288  |
| health adults 2017 last doctor visit more than 5 years excluding never                                                     | -0.383 | 0.223 | -1.717 | 0.086 | -0.820 | 0.054  |
| health children 2017 number school days missed in past 12 months due to illness or injury aged 5 17 6 10 days              | 0.000  | 0.034 | -0.010 | 0.992 | -0.067 | 0.067  |
| health children 2017 number school days missed in past 12 months due to illness or injury aged 5 17 11 or more days        | 0.016  | 0.035 | 0.450  | 0.653 | -0.053 | 0.085  |
| census employment 2017 employment potential                                                                                | -0.024 | 0.008 | -3.214 | 0.001 | -0.039 | -0.009 |
| health children 2017 number school days missed in past 12 months due to illness or injury aged 5 17 did not go to school   | -0.017 | 0.004 | -4.790 | 0.000 | -0.024 | -0.010 |
| health children 2017 children receiving special education or early intervention services                                   | 0.073  | 0.047 | 1.561  | 0.119 | -0.019 | 0.165  |

|                                                                                                                  |        |       |        |       |        |        |
|------------------------------------------------------------------------------------------------------------------|--------|-------|--------|-------|--------|--------|
| health children 2017 ever told had asthma                                                                        | 0.045  | 0.046 | 0.984  | 0.325 | -0.045 | 0.134  |
| health children 2017 still have asthma                                                                           | 0.026  | 0.042 | 0.623  | 0.533 | -0.056 | 0.109  |
| health children 2017 hay fever                                                                                   | -0.062 | 0.047 | -1.332 | 0.183 | -0.154 | 0.029  |
| health children 2017 respiratory allergies                                                                       | 0.053  | 0.045 | 1.185  | 0.236 | -0.035 | 0.142  |
| health children 2017 food allergies                                                                              | -0.071 | 0.047 | -1.527 | 0.127 | -0.163 | 0.020  |
| expenditures home 2017 rental of furniture                                                                       | -0.015 | 0.007 | -2.228 | 0.026 | -0.029 | -0.002 |
| health children 2017 children 3 to 17 learning disability                                                        | -0.055 | 0.039 | -1.421 | 0.156 | -0.132 | 0.021  |
| census demographics 2017 families 4 person families                                                              | -0.013 | 0.005 | -2.930 | 0.003 | -0.022 | -0.004 |
| census demographics 2017 householder aged 35 to 44 years households                                              | -0.011 | 0.005 | -2.046 | 0.041 | -0.022 | 0.000  |
| census demographics 2017 householder aged 55 to 64 years households                                              | -0.011 | 0.005 | -2.329 | 0.020 | -0.019 | -0.002 |
| health children 2017 fair of poor health status respondent assessed                                              | -0.041 | 0.049 | -0.830 | 0.407 | -0.138 | 0.056  |
| expenditures home 2017 stereos radios speakers and sound components including those in vehicles                  | -0.010 | 0.004 | -2.745 | 0.006 | -0.017 | -0.003 |
| health children 2017 with a usual place of health care                                                           | 0.050  | 0.044 | 1.126  | 0.260 | -0.037 | 0.137  |
| health children 2017 with a usual place of health care doctor s office                                           | 0.007  | 0.011 | 0.710  | 0.478 | -0.013 | 0.028  |
| health children 2017 with a usual place of health care emergency room                                            | 0.002  | 0.047 | 0.043  | 0.966 | -0.090 | 0.094  |
| expenditures food 2017 oranges                                                                                   | -0.008 | 0.004 | -1.984 | 0.047 | -0.015 | 0.000  |
| health children 2017 with a usual place of health care some other place                                          | 0.087  | 0.048 | 1.808  | 0.071 | -0.007 | 0.181  |
| census housing units 2017 housing owner households valued 25000 29999                                            | -0.006 | 0.002 | -2.763 | 0.006 | -0.010 | -0.002 |
| census employment 2017 employment public administration                                                          | -0.004 | 0.001 | -3.129 | 0.002 | -0.007 | -0.002 |
| census housing units 2017 housing owner households valued 750000 999999                                          | -0.004 | 0.002 | -2.396 | 0.017 | -0.007 | -0.001 |
| census demographics 2017 families aged 75 years and over families                                                | -0.003 | 0.002 | -2.079 | 0.038 | -0.007 | 0.000  |
| health children 2017 last health care professional visit more than 5 years                                       | -0.064 | 0.047 | -1.344 | 0.179 | -0.157 | 0.029  |
| health children 2017 delayed care due to cost                                                                    | -0.031 | 0.045 | -0.688 | 0.492 | -0.118 | 0.057  |
| health children 2017 children 2 17 years yes unmet dental need                                                   | -0.062 | 0.041 | -1.517 | 0.129 | -0.142 | 0.018  |
| health children 2017 children 2 17 years no unmet dental need                                                    | 0.030  | 0.031 | 0.959  | 0.338 | -0.031 | 0.092  |
| health children 2017 children 2 17 years more than 1 year but not more than 2 years since last dental visit      | 0.071  | 0.040 | 1.756  | 0.079 | -0.008 | 0.150  |
| health children 2017 children 2 17 years more than 2 years but not more than 5 years ago since last dental visit | 0.057  | 0.042 | 1.363  | 0.173 | -0.025 | 0.138  |
| census demographics 2017 families married with no children under 18 families                                     | -0.002 | 0.001 | -2.955 | 0.003 | -0.004 | -0.001 |
| census employment 2017 employment bus or trolley bus to work empl                                                | -0.001 | 0.002 | -0.654 | 0.513 | -0.004 | 0.002  |
| census employment 2017 employment streetcar or trolley car to work empl                                          | 0.040  | 0.022 | 1.794  | 0.073 | -0.004 | 0.083  |

|                                                                                       |        |       |        |       |        |        |
|---------------------------------------------------------------------------------------|--------|-------|--------|-------|--------|--------|
| census employment 2017 employment subway or elevated to work empl                     | -0.002 | 0.001 | -1.741 | 0.082 | -0.005 | 0.000  |
| census employment 2017 employment ferry to work empl                                  | -0.007 | 0.013 | -0.533 | 0.594 | -0.033 | 0.019  |
| census employment 2017 employment motorcycle to work empl                             | -0.004 | 0.008 | -0.502 | 0.616 | -0.020 | 0.012  |
| census employment 2017 employment bicycle to work empl                                | -0.002 | 0.003 | -0.774 | 0.439 | -0.008 | 0.003  |
| census employment 2017 employment walked to work empl                                 | 0.001  | 0.001 | 0.486  | 0.627 | -0.002 | 0.003  |
| census employment 2017 employment other transportation to work empl                   | 0.002  | 0.002 | 0.671  | 0.502 | -0.003 | 0.006  |
| census employment 2017 occupation professional and related                            | -0.002 | 0.001 | -2.121 | 0.034 | -0.004 | 0.000  |
| census employment 2017 employment travel time 60 89 min empl                          | 0.001  | 0.001 | 1.041  | 0.298 | -0.001 | 0.003  |
| census employment 2017 employment travel time 90 min empl                             | 0.000  | 0.002 | -0.213 | 0.832 | -0.003 | 0.003  |
| census employment 2017 employment private for profit wage and salary workers employee | -0.002 | 0.001 | -2.882 | 0.004 | -0.004 | -0.001 |
| census employment 2017 employment civilian males                                      | -0.001 | 0.001 | -0.827 | 0.408 | -0.003 | 0.001  |
| census employment 2017 employment armed forces female                                 | 0.000  | 0.009 | -0.033 | 0.974 | -0.017 | 0.017  |
| census housing units 2017 housing median year built count year                        | -0.002 | 0.000 | -3.827 | 0.000 | -0.003 | -0.001 |
| expenditures food 2017 other alcoholic beverages away                                 | -0.002 | 0.001 | -2.093 | 0.036 | -0.003 | 0.000  |
| census employment 2017 employment mining quarrying and oil and gas extraction         | 0.002  | 0.001 | 1.899  | 0.058 | 0.000  | 0.004  |
| census employment 2017 employment wholesale trade                                     | 0.000  | 0.002 | 0.124  | 0.901 | -0.004 | 0.004  |
| census housing units 2017 housing built 2000 to 2009                                  | -0.001 | 0.000 | -2.610 | 0.009 | -0.002 | 0.000  |
| census employment 2017 employment transportation and warehousing                      | 0.001  | 0.001 | 0.603  | 0.546 | -0.002 | 0.003  |
| census employment 2017 employment utilities                                           | 0.002  | 0.002 | 0.741  | 0.459 | -0.003 | 0.006  |
| census employment 2017 employment finance and insurance                               | 0.002  | 0.001 | 1.401  | 0.161 | -0.001 | 0.005  |
| census employment 2017 employment professional scientific and technical services      | -0.002 | 0.002 | -1.424 | 0.154 | -0.005 | 0.001  |
| census employment 2017 employment educational services                                | 0.000  | 0.001 | 0.035  | 0.972 | -0.002 | 0.003  |
| census housing units 2017 housing structure with 1 unit attached                      | -0.001 | 0.000 | -2.157 | 0.031 | -0.002 | 0.000  |
| census employment 2017 employment arts entertainment and recreation                   | 0.002  | 0.002 | 1.209  | 0.227 | -0.001 | 0.006  |
| census demographics 2017 population urban persons                                     | 0.000  | 0.000 | -5.063 | 0.000 | -0.001 | 0.000  |
| census employment 2017 employment other services                                      | -0.003 | 0.002 | -1.762 | 0.078 | -0.007 | 0.000  |
| census demographics 2017 population males never married pop 15 persons                | 0.000  | 0.000 | -5.204 | 0.000 | 0.000  | 0.000  |
| census demographics 2017 household income median                                      | 0.000  | 0.000 | 2.775  | 0.006 | 0.000  | 0.000  |
| census employment 2017 occupation service                                             | 0.001  | 0.001 | 0.978  | 0.328 | -0.001 | 0.003  |

|                                                                                                  |        |       |        |       |        |       |
|--------------------------------------------------------------------------------------------------|--------|-------|--------|-------|--------|-------|
| census demographics 2017 education not enrolled in school pop 3 persons                          | 0.000  | 0.000 | 2.032  | 0.042 | 0.000  | 0.000 |
| census housing units 2017 home heating fuel bottled tank or lp gas                               | 0.001  | 0.000 | 3.504  | 0.000 | 0.000  | 0.001 |
| census housing units 2017 home heating fuel wood                                                 | 0.001  | 0.000 | 2.971  | 0.003 | 0.000  | 0.002 |
| expenditures home 2017 babysitting and child care                                                | 0.001  | 0.001 | 2.101  | 0.036 | 0.000  | 0.002 |
| census employment 2017 employment self employed workers in own not incorporated business         | -0.002 | 0.001 | -1.486 | 0.137 | -0.004 | 0.001 |
| census demographics 2017 education enrolled public grades 5 8 pop 3 persons                      | 0.001  | 0.001 | 2.221  | 0.026 | 0.000  | 0.002 |
| census housing units 2017 housing median year moved in count year                                | 0.002  | 0.000 | 3.962  | 0.000 | 0.001  | 0.003 |
| census employment 2017 employment not in the labor force female                                  | 0.002  | 0.001 | 2.095  | 0.036 | 0.000  | 0.003 |
| census housing units 2017 home heating fuel fuel oil kerosene etc                                | 0.000  | 0.000 | -1.431 | 0.153 | -0.001 | 0.000 |
| census housing units 2017 home heating fuel coal or coke                                         | 0.000  | 0.002 | 0.065  | 0.948 | -0.003 | 0.004 |
| expenditures home 2017 men 16 and over                                                           | 0.002  | 0.001 | 2.727  | 0.006 | 0.001  | 0.003 |
| census housing units 2017 home heating fuel other fuel                                           | 0.000  | 0.002 | -0.235 | 0.814 | -0.004 | 0.003 |
| census housing units 2017 home heating fuel no fuel used                                         | 0.001  | 0.001 | 1.721  | 0.085 | 0.000  | 0.002 |
| census housing units 2017 housing occupied units                                                 | 0.000  | 0.001 | 0.176  | 0.860 | -0.002 | 0.002 |
| census housing units 2017 housing vacant units rented not occupied                               | 0.001  | 0.012 | 0.092  | 0.926 | -0.022 | 0.024 |
| census housing units 2017 housing vacant units for sale                                          | -0.001 | 0.003 | -0.436 | 0.663 | -0.006 | 0.004 |
| census demographics 2017 education enrolled public preprimary pop 3 persons                      | 0.002  | 0.001 | 2.246  | 0.025 | 0.000  | 0.003 |
| census housing units 2017 housing vacant units vacant other                                      | 0.000  | 0.001 | 0.072  | 0.943 | -0.001 | 0.002 |
| census demographics 2017 education enrolled public graduate or professional school pop 3 persons | 0.002  | 0.001 | 2.098  | 0.036 | 0.000  | 0.004 |
| census housing units 2017 housing structure with 2 units                                         | -0.001 | 0.001 | -1.441 | 0.150 | -0.002 | 0.000 |
| census housing units 2017 housing structure with 3 4 units                                       | -0.001 | 0.001 | -0.961 | 0.337 | -0.002 | 0.001 |
| census housing units 2017 housing structure mobile home                                          | -0.001 | 0.000 | -1.554 | 0.120 | -0.001 | 0.000 |
| census housing units 2017 housing built 1940 to 1949                                             | 0.002  | 0.001 | 3.525  | 0.000 | 0.001  | 0.003 |
| census housing units 2017 housing rent 500 749                                                   | 0.000  | 0.001 | 0.640  | 0.522 | -0.001 | 0.001 |
| census employment 2017 employment retail trade                                                   | 0.002  | 0.001 | 2.235  | 0.025 | 0.000  | 0.004 |
| census housing units 2017 housing rent 1250 1499                                                 | -0.002 | 0.002 | -0.971 | 0.332 | -0.005 | 0.002 |
| census housing units 2017 housing rent 1500 1999                                                 | 0.002  | 0.002 | 0.971  | 0.332 | -0.002 | 0.005 |
| census housing units 2017 housing no cash rent                                                   | -0.001 | 0.001 | -1.176 | 0.240 | -0.004 | 0.001 |
| census housing units 2017 housing owner households valued 10000 14999                            | 0.001  | 0.002 | 0.389  | 0.697 | -0.003 | 0.005 |
| census housing units 2017 housing owner households valued 20000 24999                            | -0.003 | 0.002 | -1.708 | 0.088 | -0.007 | 0.000 |
| census housing units 2017 housing rent 750 999                                                   | 0.002  | 0.001 | 3.108  | 0.002 | 0.001  | 0.004 |

|                                                                                                     |        |       |        |       |        |       |
|-----------------------------------------------------------------------------------------------------|--------|-------|--------|-------|--------|-------|
| census housing units 2017 housing owner households valued 50000 59999                               | -0.001 | 0.001 | -1.230 | 0.219 | -0.004 | 0.001 |
| census housing units 2017 housing owner households valued 80000 89999                               | 0.000  | 0.001 | 0.074  | 0.941 | -0.002 | 0.002 |
| census housing units 2017 housing owner households valued 90000 99999                               | -0.001 | 0.001 | -1.138 | 0.255 | -0.004 | 0.001 |
| census housing units 2017 housing owner households valued 100000 124999                             | -0.001 | 0.001 | -1.046 | 0.296 | -0.002 | 0.001 |
| census housing units 2017 housing owner households valued 125000 149999                             | 0.000  | 0.001 | -0.052 | 0.958 | -0.002 | 0.002 |
| census housing units 2017 housing owner households valued 150000 174999                             | 0.000  | 0.001 | -0.393 | 0.694 | -0.002 | 0.001 |
| census housing units 2017 housing owner households valued 175000 199999                             | 0.001  | 0.001 | 0.526  | 0.599 | -0.002 | 0.003 |
| census housing units 2017 housing owner households valued 400000 499999                             | 0.000  | 0.001 | 0.229  | 0.819 | -0.002 | 0.003 |
| census employment 2017 employment local government workers                                          | 0.002  | 0.001 | 2.165  | 0.030 | 0.000  | 0.005 |
| census housing units 2017 housing owner households valued more than 1000000                         | 0.002  | 0.001 | 2.029  | 0.043 | 0.000  | 0.005 |
| census employment 2017 employment accommodation and food services                                   | 0.003  | 0.001 | 2.104  | 0.035 | 0.000  | 0.005 |
| census housing units 2017 housing built 1970 to 1979                                                | 0.000  | 0.000 | 0.179  | 0.858 | -0.001 | 0.001 |
| census housing units 2017 housing built 1960 to 1969                                                | 0.000  | 0.000 | -0.623 | 0.534 | -0.001 | 0.001 |
| census housing units 2017 housing built 1950 to 1959                                                | 0.000  | 0.000 | -0.683 | 0.495 | -0.001 | 0.000 |
| census employment 2017 employment travel time less than 15 min empl                                 | 0.003  | 0.000 | 8.630  | 0.000 | 0.002  | 0.003 |
| census housing units 2017 housing year moved in 2010 or later                                       | -0.001 | 0.001 | -1.723 | 0.085 | -0.003 | 0.000 |
| census housing units 2017 housing year moved in 1990 to 1999                                        | -0.002 | 0.001 | -1.779 | 0.075 | -0.004 | 0.000 |
| census housing units 2017 housing year moved in 1970 to 1979                                        | 0.002  | 0.001 | 1.526  | 0.127 | -0.001 | 0.004 |
| census housing units 2017 housing year moved in 1969 or earlier                                     | -0.001 | 0.002 | -0.893 | 0.372 | -0.004 | 0.002 |
| census housing units 2017 housing owner households with mortgage any                                | 0.000  | 0.001 | -0.086 | 0.932 | -0.002 | 0.002 |
| census housing units 2017 housing owner households with no mortgage                                 | 0.000  | 0.001 | 0.354  | 0.724 | -0.002 | 0.003 |
| expenditures food 2017 dinner at fast food take out delivery concession stands buffet and cafeteria | 0.000  | 0.000 | -0.554 | 0.580 | -0.001 | 0.001 |
| expenditures food 2017 dinner at vending machines and mobile vendors                                | -0.020 | 0.029 | -0.681 | 0.496 | -0.077 | 0.037 |
| expenditures food 2017 breakfast and brunch at vending machines and mobile vendors                  | 0.007  | 0.007 | 0.959  | 0.337 | -0.007 | 0.021 |
| expenditures food 2017 food or board at school                                                      | -0.001 | 0.001 | -0.381 | 0.703 | -0.003 | 0.002 |
| expenditures food 2017 education                                                                    | 0.000  | 0.000 | -1.641 | 0.101 | 0.000  | 0.000 |
| expenditures food 2017 school books supplies equipment for college                                  | 0.001  | 0.001 | 0.658  | 0.511 | -0.001 | 0.002 |
| expenditures food 2017 school books supplies equipment for vocational and technical schools         | 0.039  | 0.060 | 0.662  | 0.508 | -0.077 | 0.156 |
| census employment 2017 employment private not for profit wage and salary workers                    | 0.003  | 0.001 | 2.400  | 0.016 | 0.001  | 0.005 |



|                                                                                                  |        |       |        |       |        |       |
|--------------------------------------------------------------------------------------------------|--------|-------|--------|-------|--------|-------|
| expenditures food 2017 ice cream and related products                                            | 0.002  | 0.001 | 1.489  | 0.137 | -0.001 | 0.004 |
| census housing units 2017 housing rent less than 250                                             | 0.003  | 0.001 | 3.220  | 0.001 | 0.001  | 0.005 |
| expenditures food 2017 food on out of town trips                                                 | 0.000  | 0.000 | 1.583  | 0.113 | 0.000  | 0.001 |
| expenditures food 2017 meals as pay                                                              | 0.000  | 0.001 | -0.414 | 0.679 | -0.002 | 0.001 |
| expenditures food 2017 whiskey                                                                   | 0.002  | 0.003 | 0.680  | 0.497 | -0.004 | 0.009 |
| census demographics 2017 households with 2 vehicles households                                   | 0.003  | 0.002 | 2.165  | 0.031 | 0.000  | 0.006 |
| expenditures food 2017 lamb organ meats and others                                               | 0.004  | 0.003 | 1.653  | 0.099 | -0.001 | 0.010 |
| expenditures food 2017 other fresh fruits                                                        | 0.001  | 0.001 | 1.014  | 0.311 | -0.001 | 0.004 |
| expenditures food 2017 pies tarts turnovers                                                      | 0.007  | 0.005 | 1.404  | 0.160 | -0.003 | 0.016 |
| expenditures food 2017 prepared flour mixes                                                      | 0.001  | 0.002 | 0.322  | 0.747 | -0.004 | 0.005 |
| expenditures food 2017 artificial sweeteners                                                     | -0.039 | 0.026 | -1.511 | 0.131 | -0.089 | 0.012 |
| census demographics 2017 households with 1 vehicle households                                    | 0.003  | 0.001 | 2.335  | 0.020 | 0.001  | 0.006 |
| expenditures home 2017 lawn and garden equipment                                                 | 0.004  | 0.001 | 2.636  | 0.008 | 0.001  | 0.006 |
| expenditures home 2017 infants equipment                                                         | 0.001  | 0.002 | 0.326  | 0.745 | -0.004 | 0.005 |
| census demographics 2017 households with no vehicles households                                  | 0.004  | 0.002 | 2.086  | 0.037 | 0.000  | 0.008 |
| expenditures home 2017 closet and storage items                                                  | 0.007  | 0.008 | 0.885  | 0.376 | -0.009 | 0.023 |
| census employment 2017 employment agriculture forestry fishing and hunting                       | 0.004  | 0.001 | 5.091  | 0.000 | 0.003  | 0.006 |
| expenditures home 2017 apparel and services                                                      | 0.000  | 0.000 | 1.243  | 0.214 | 0.000  | 0.000 |
| census employment 2017 employment federal government workers                                     | 0.005  | 0.001 | 3.056  | 0.002 | 0.002  | 0.007 |
| census demographics 2017 households with 3 vehicles households                                   | 0.005  | 0.002 | 2.607  | 0.009 | 0.001  | 0.009 |
| census employment 2017 employment health care and social assistance                              | 0.007  | 0.001 | 6.537  | 0.000 | 0.005  | 0.009 |
| expenditures home 2017 mens active sportswear                                                    | 0.007  | 0.009 | 0.831  | 0.406 | -0.010 | 0.025 |
| expenditures home 2017 mens costumes                                                             | -0.180 | 0.096 | -1.880 | 0.060 | -0.367 | 0.008 |
| expenditures home 2017 boys suits sportcoats vests                                               | 0.016  | 0.042 | 0.380  | 0.704 | -0.066 | 0.097 |
| expenditures home 2017 womens sportcoats tailored jackets                                        | 0.005  | 0.003 | 1.768  | 0.077 | -0.001 | 0.011 |
| expenditures home 2017 ground rent                                                               | 0.000  | 0.002 | 0.207  | 0.836 | -0.003 | 0.003 |
| expenditures home 2017 rent as pay                                                               | 0.000  | 0.000 | -1.002 | 0.317 | -0.001 | 0.000 |
| expenditures home 2017 bottled gas                                                               | -0.001 | 0.003 | -0.180 | 0.857 | -0.006 | 0.005 |
| expenditures home 2017 personal services                                                         | 0.000  | 0.000 | -0.538 | 0.591 | 0.000  | 0.000 |
| expenditures home 2017 water softening service                                                   | 0.007  | 0.015 | 0.465  | 0.642 | -0.023 | 0.037 |
| expenditures home 2017 household laundry and dry cleaning sent out nonclothing not coin operated | 0.000  | 0.003 | 0.018  | 0.986 | -0.006 | 0.006 |
| expenditures home 2017 computer installation                                                     | 0.004  | 0.090 | 0.044  | 0.965 | -0.172 | 0.180 |
| expenditures home 2017 miscellaneous household products                                          | -0.001 | 0.002 | -0.713 | 0.476 | -0.005 | 0.002 |
| expenditures home 2017 stationery stationery supplies giftwrap                                   | 0.006  | 0.004 | 1.576  | 0.115 | -0.001 | 0.014 |

|                                                                                        |        |       |        |       |        |       |
|----------------------------------------------------------------------------------------|--------|-------|--------|-------|--------|-------|
| expenditures home 2017 living room tables                                              | -0.010 | 0.007 | -1.338 | 0.181 | -0.024 | 0.004 |
| expenditures home 2017 girls footwear                                                  | 0.008  | 0.004 | 2.133  | 0.033 | 0.001  | 0.015 |
| expenditures home 2017 audio and visual equipment and services                         | 0.003  | 0.002 | 1.597  | 0.110 | -0.001 | 0.006 |
| expenditures home 2017 televisions                                                     | 0.001  | 0.005 | 0.159  | 0.874 | -0.009 | 0.011 |
| expenditures home 2017 cable and satellite television services                         | -0.002 | 0.002 | -1.415 | 0.157 | -0.006 | 0.001 |
| expenditures home 2017 sound equipment accessories                                     | 0.021  | 0.021 | 1.007  | 0.314 | -0.020 | 0.063 |
| expenditures home 2017 applications games ringtones for handheld devices               | -0.153 | 0.089 | -1.720 | 0.086 | -0.327 | 0.021 |
| expenditures home 2017 repair of tv radio and sound equipment                          | -0.236 | 0.133 | -1.778 | 0.075 | -0.496 | 0.024 |
| expenditures home 2017 musical instruments and accessories                             | 0.005  | 0.007 | 0.749  | 0.454 | -0.008 | 0.019 |
| census demographics 2017 education attainment professional degree pop 25 persons       | 0.008  | 0.002 | 3.818  | 0.000 | 0.004  | 0.012 |
| expenditures home 2017 lamps lighting fixtures ceiling fans                            | 0.009  | 0.004 | 2.297  | 0.022 | 0.001  | 0.017 |
| expenditures home 2017 boys uniforms and active sportswear                             | -0.012 | 0.006 | -1.927 | 0.054 | -0.025 | 0.000 |
| expenditures food 2017 jams preserves other sweets                                     | 0.010  | 0.004 | 2.272  | 0.023 | 0.001  | 0.018 |
| expenditures home 2017 flooring installation repair replacement owned                  | -0.001 | 0.002 | -0.705 | 0.481 | -0.005 | 0.002 |
| expenditures home 2017 girls shirts blouses sweaters and vests                         | 0.005  | 0.006 | 0.840  | 0.401 | -0.007 | 0.017 |
| expenditures home 2017 infant underwear                                                | 0.010  | 0.005 | 2.016  | 0.044 | 0.000  | 0.019 |
| census housing units 2017 housing vacant units sold not occupied                       | 0.018  | 0.004 | 4.089  | 0.000 | 0.009  | 0.026 |
| expenditures home 2017 interest paid home equity loan                                  | 0.001  | 0.003 | 0.232  | 0.816 | -0.005 | 0.006 |
| expenditures home 2017 womens hosiery                                                  | -0.004 | 0.009 | -0.451 | 0.652 | -0.021 | 0.013 |
| census demographics 2017 asian households households                                   | 0.018  | 0.009 | 1.971  | 0.049 | 0.000  | 0.037 |
| expenditures home 2017 womens costumes                                                 | -0.021 | 0.044 | -0.470 | 0.638 | -0.106 | 0.065 |
| expenditures home 2017 girls costumes                                                  | -0.052 | 0.028 | -1.897 | 0.058 | -0.106 | 0.002 |
| expenditures home 2017 mens hosiery                                                    | 0.025  | 0.009 | 2.674  | 0.008 | 0.007  | 0.043 |
| census demographics 2017 households 4 person households                                | 0.044  | 0.017 | 2.627  | 0.009 | 0.011  | 0.077 |
| expenditures miscellaneous 2017 finance late interest charges for other loans          | 0.062  | 0.028 | 2.230  | 0.026 | 0.007  | 0.116 |
| expenditures miscellaneous 2017 auto truck rental                                      | -0.029 | 0.034 | -0.874 | 0.382 | -0.095 | 0.036 |
| health children 2017 prescription medication taken regularly for at least 3 months     | 0.097  | 0.042 | 2.297  | 0.022 | 0.014  | 0.180 |
| health children 2017 children 2 17 years more than 5 years since last dental visit     | 0.104  | 0.026 | 3.990  | 0.000 | 0.053  | 0.155 |
| expenditures miscellaneous 2017 finance late interest charges for student loans        | 0.012  | 0.007 | 1.670  | 0.095 | -0.002 | 0.026 |
| expenditures miscellaneous 2017 care for elderly invalids handicapped etc              | 0.000  | 0.019 | -0.013 | 0.990 | -0.038 | 0.038 |
| health children 2017 emergency room visits in past 12 months for children under 18 one | 0.108  | 0.039 | 2.754  | 0.006 | 0.031  | 0.185 |

|                                                                                                         |        |       |        |       |        |       |
|---------------------------------------------------------------------------------------------------------|--------|-------|--------|-------|--------|-------|
| health children 2017 last health care professional visit more than six months but less than 1 year      | 0.109  | 0.045 | 2.395  | 0.017 | 0.020  | 0.197 |
| expenditures miscellaneous 2017 towing charges                                                          | -0.208 | 0.116 | -1.791 | 0.073 | -0.436 | 0.020 |
| expenditures miscellaneous 2017 taxi fares and limousine services                                       | 0.039  | 0.028 | 1.411  | 0.158 | -0.015 | 0.093 |
| expenditures miscellaneous 2017 adult diapers                                                           | -0.233 | 0.139 | -1.672 | 0.095 | -0.506 | 0.040 |
| health children 2017 with a usual place of health care hospital outpatient                              | 0.122  | 0.048 | 2.575  | 0.010 | 0.029  | 0.216 |
| health children 2017 last health care professional visit more than 1 year but not more than 2 years ago | 0.181  | 0.048 | 3.742  | 0.000 | 0.086  | 0.276 |
| expenditures miscellaneous 2017 trailer and other attachable campers                                    | -0.017 | 0.009 | -1.947 | 0.052 | -0.034 | 0.000 |
| expenditures miscellaneous 2017 purchase of motorized camper                                            | 0.006  | 0.006 | 1.093  | 0.275 | -0.005 | 0.018 |
| expenditures miscellaneous 2017 winter sports equipment                                                 | -0.059 | 0.071 | -0.831 | 0.406 | -0.199 | 0.081 |
| expenditures miscellaneous 2017 global positioning system devices                                       | -0.006 | 0.055 | -0.116 | 0.907 | -0.114 | 0.101 |
| health adults 2017 has unmet dental need due to cost                                                    | 0.433  | 0.171 | 2.536  | 0.011 | 0.098  | 0.767 |
| expenditures miscellaneous 2017 film                                                                    | -0.199 | 0.163 | -1.214 | 0.225 | -0.519 | 0.122 |
| expenditures miscellaneous 2017 fireworks                                                               | 0.020  | 0.026 | 0.783  | 0.434 | -0.030 | 0.070 |
| expenditures miscellaneous 2017 visual goods                                                            | 0.320  | 0.177 | 1.805  | 0.071 | -0.027 | 0.668 |
| expenditures miscellaneous 2017 funeral expenses                                                        | 0.022  | 0.014 | 1.610  | 0.108 | -0.005 | 0.050 |
| expenditures miscellaneous 2017 dating services                                                         | -0.282 | 0.177 | -1.591 | 0.112 | -0.630 | 0.065 |
| expenditures miscellaneous 2017 child support expenditures                                              | 0.005  | 0.004 | 1.081  | 0.280 | -0.004 | 0.014 |
| expenditures miscellaneous 2017 gift to non cu members of stocks bonds and mutual funds                 | -0.005 | 0.005 | -0.958 | 0.338 | -0.016 | 0.005 |

HH=Household  
 Fam=Family  
 Pop=Population  
 Non Fam=Non family  
 OT=Other  
 ER=Emergency room  
 RV=recreational vehicle  
 Equip=equipment  
 Misc.=miscellaneous  
 BCBS=Blue Cross Blue Shield  
 OOT=Out of town  
 RIHC=resource intensive healthcare
